# Supplementary material for: Population transcriptomic sequencing reveals allopatric divergence and local adaptation in Pseudotaxus chienii (Taxaceae)
Source: BMC Genomics. 2021 May 26;22:388. doi: 10.1186/s12864-021-07682-3 (PMC8157689; doi:10.1186/s12864-021-07682-3)
Supplement: Supplementary file 13 — Additional file 13. The annotation of the unigenes containing outlier SNPs. [file 12864_2021_7682_MOESM13_ESM.csv]

Additional file 13. The annotation of the unigenes containing outlier SNPs.
Unigenes	KEGG ID	KEGG Name	KEGG Description	Http Link	Swissprot ID	Swissprot Score	Swissprot Evalue	Swissprot Description	PFAM ID	PFAM description	Gene Ontology Biological Pathway	BP Description	Gene Ontology Molecular Function	MF Description	Gene Ontology Cellular Component	CC Description
Cluster-242496.121433	--	--	--	--	--	--	--	--	--	--	--	--	--	--	--	--
Cluster-242496.94872	--	--	--	--	Q9LSD5	369	1.60E-33	Transcription factor TCP20 OS=Arabidopsis thaliana GN=TCP20 PE=1 SV=1	--	--	--	--	--	--	--	--
Cluster-242496.104194	K03549	kup	KUP system potassium uptake protein	http://www.genome.jp/dbget-bin/www_bget?ko:K03549	Q942X8	1885	3.10E-209	Probable potassium transporter 2 OS=Oryza sativa subsp. japonica GN=HAK2 PE=2 SV=1	PF02705//PF05656	K+ potassium transporter//Protein of unknown function (DUF805)	GO:0006813//GO:0071805	potassium ion transport//potassium ion transmembrane transport	GO:0015079	potassium ion transmembrane transporter activity	GO:0016021//GO:0016020	integral component of membrane//membrane
Cluster-242496.88141	--	--	--	--	Q9SKQ4	317	3.90E-28	Pentatricopeptide repeat-containing protein At2g21090 OS=Arabidopsis thaliana GN=PCMP-E48 PE=2 SV=1	--	--	--	--	--	--	--	--
Cluster-242496.104477	K14486	K14486, ARF	auxin response factor	http://www.genome.jp/dbget-bin/www_bget?ko:K14486	Q9ZTX9	1079	7.90E-116	Auxin response factor 4 OS=Arabidopsis thaliana GN=ARF4 PE=1 SV=1	PF06507//PF01212//PF02309//PF02362	Auxin response factor//Beta-eliminating lyase//AUX/IAA family//B3 DNA binding domain	GO:0006355//GO:0006520//GO:0009725	regulation of transcription, DNA-templated//cellular amino acid metabolic process//response to hormone	GO:0003677//GO:0016829	DNA binding//lyase activity	GO:0005634	nucleus
Cluster-242496.111222	--	--	--	--	A8MRX0	1218	5.10E-132	Flavin-containing monooxygenase FMO GS-OX5 OS=Arabidopsis thaliana GN=FMOGS-OX5 PE=2 SV=2	PF13241//PF01494//PF01266//PF01134//PF07992//PF02826//PF01593//PF02558//PF12831//PF02737//PF00070//PF00743//PF05834//PF08534//PF02254//PF01210//PF03446	Putative NAD(P)-binding//FAD binding domain//FAD dependent oxidoreductase//Glucose inhibited division protein A//Pyridine nucleotide-disulphide oxidoreductase//D-isomer specific 2-hydroxyacid dehydrogenase, NAD binding domain//Flavin containing amine oxidoreductase//Ketopantoate reductase PanE/ApbA//FAD dependent oxidoreductase//3-hydroxyacyl-CoA dehydrogenase, NAD binding domain//Pyridine nucleo…	GO:0008033//GO:0006779//GO:0055114//GO:0006813//GO:0046168//GO:0006098//GO:0015940//GO:0019521//GO:0006554//GO:0018874//GO:0006574//GO:0019354//GO:0006633//GO:0016117//GO:0006552//GO:0006568//GO:0006550//GO:0006631	tRNA processing//porphyrin-containing compound biosynthetic process//oxidation-reduction process//potassium ion transport//glycerol-3-phosphate catabolic process//pentose-phosphate shunt//pantothenate biosynthetic process//D-gluconate metabolic process//lysine catabolic process//benzoate metabolic process//valine catabolic process//siroheme biosynthetic process//fatty acid biosynthetic process//c…	GO:0043115//GO:0016491//GO:0008677//GO:0016705//GO:0050661//GO:0003857//GO:0071949//GO:0016616//GO:0004616//GO:0050660//GO:0004499//GO:0051287	precorrin-2 dehydrogenase activity//oxidoreductase activity//2-dehydropantoate 2-reductase activity//oxidoreductase activity, acting on paired donors, with incorporation or reduction of molecular oxygen//NADP binding//3-hydroxyacyl-CoA dehydrogenase activity//FAD binding//oxidoreductase activity, acting on the CH-OH group of donors, NAD or NADP as acceptor//phosphogluconate dehydrogenase (decarbo…	--	--
Cluster-242496.79743	--	--	--	--	--	--	--	--	--	--	--	--	--	--	--	--
Cluster-242496.116884	--	--	--	--	Q8R151	708	1.40E-72	NFX1-type zinc finger-containing protein 1 OS=Mus musculus GN=Znfx1 PE=2 SV=3	PF00270//PF04851//PF00437//PF00580//PF02562//PF00644	DEAD/DEAH box helicase//Type III restriction enzyme, res subunit//Type II/IV secretion system protein//UvrD/REP helicase N-terminal domain//PhoH-like protein//Poly(ADP-ribose) polymerase catalytic domain	GO:0006810	transport	GO:0003677//GO:0005524//GO:0003676//GO:0016787//GO:0003950	DNA binding//ATP binding//nucleic acid binding//hydrolase activity//NAD+ ADP-ribosyltransferase activity	--	--
Cluster-242496.112753	K09680	coaW	type II pantothenate kinase	http://www.genome.jp/dbget-bin/www_bget?ko:K09680	Q8TE04	458	6.70E-44	Pantothenate kinase 1 OS=Homo sapiens GN=PANK1 PE=1 SV=2	PF03630	Fumble	GO:0015937//GO:0015940	coenzyme A biosynthetic process//pantothenate biosynthetic process	GO:0004594//GO:0005524	pantothenate kinase activity//ATP binding	--	--
Cluster-242496.105072	--	--	--	--	Q9SD62	195	4.20E-14	Putative receptor-like protein kinase At3g47110 OS=Arabidopsis thaliana GN=At3g47110 PE=3 SV=1	PF07714//PF00069	Protein tyrosine kinase//Protein kinase domain	GO:0006468	protein phosphorylation	GO:0004672//GO:0005524	protein kinase activity//ATP binding	--	--
Cluster-242496.79401	--	--	--	--	Q9FX35	1147	8.00E-124	Pentatricopeptide repeat-containing protein At1g73400, mitochondrial OS=Arabidopsis thaliana GN=At1g73400 PE=2 SV=2	PF02212//PF13374	Dynamin GTPase effector domain//Tetratricopeptide repeat	--	--	GO:0005515//GO:0005525//GO:0003924	protein binding//GTP binding//GTPase activity	--	--
Cluster-242496.100929	--	--	--	--	F4IAE9	3014	0.00E+00	ATPase family AAA domain-containing protein At1g05910 OS=Arabidopsis thaliana GN=At1g05910 PE=2 SV=1	PF00158//PF02562//PF07728//PF07724//PF05496//PF06068//PF01695//PF01057//PF00910//PF14532//PF00439//PF00005//PF00004	Sigma-54 interaction domain//PhoH-like protein//AAA domain (dynein-related subfamily)//AAA domain (Cdc48 subfamily)//Holliday junction DNA helicase ruvB N-terminus//TIP49 C-terminus//IstB-like ATP binding protein//Parvovirus non-structural protein NS1//RNA helicase//Sigma-54 interaction domain//Bromodomain//ABC transporter//ATPase family associated with various cellular activities (AAA)	GO:0006310//GO:0006355//GO:0019079//GO:0006281	DNA recombination//regulation of transcription, DNA-templated//viral genome replication//DNA repair	GO:0003724//GO:0003723//GO:0005515//GO:0005524//GO:0009378//GO:0003678//GO:0016887//GO:0008134	RNA helicase activity//RNA binding//protein binding//ATP binding//four-way junction helicase activity//DNA helicase activity//ATPase activity//transcription factor binding	GO:0005657//GO:0005667//GO:0009379	replication fork//transcription factor complex//Holliday junction helicase complex
Cluster-242496.102255	--	--	--	--	--	--	--	--	PF06268//PF00967	Fascin domain//Barwin family	GO:0050832//GO:0042742	defense response to fungus//defense response to bacterium	GO:0051015//GO:0030674	actin filament binding//protein binding, bridging	--	--
Cluster-242496.101130	--	--	--	--	Q9I9H8	169	3.20E-10	Apoptotic protease-activating factor 1 OS=Danio rerio GN=apaf1 PE=2 SV=1	PF00931//PF10798//PF01637//PF00514//PF00004	NB-ARC domain//Biofilm development protein YmgB/AriR//Archaeal ATPase//Armadillo/beta-catenin-like repeat//ATPase family associated with various cellular activities (AAA)	GO:0071229//GO:0042710	cellular response to acid chemical//biofilm formation	GO:0043531//GO:0005524//GO:0005515	ADP binding//ATP binding//protein binding	--	--
Cluster-242496.112846	--	--	--	--	O49545	2411	3.10E-270	Leucine-rich repeat receptor-like serine/threonine-protein kinase BAM1 OS=Arabidopsis thaliana GN=BAM1 PE=1 SV=1	PF07525//PF13855//PF00069//PF07714//PF00560	SOCS box//Leucine rich repeat//Protein kinase domain//Protein tyrosine kinase//Leucine Rich Repeat	GO:0006468//GO:0035556	protein phosphorylation//intracellular signal transduction	GO:0004672//GO:0005524//GO:0005515	protein kinase activity//ATP binding//protein binding	--	--
Cluster-242496.59335	--	--	--	--	--	--	--	--	--	--	--	--	--	--	--	--
Cluster-242496.77306	--	--	--	--	Q8S8Q6	475	4.10E-46	Tetraspanin-8 OS=Arabidopsis thaliana GN=TET8 PE=2 SV=1	PF07562	Nine Cysteines Domain of family 3 GPCR	GO:0007186	G-protein coupled receptor signaling pathway	GO:0004930	G-protein coupled receptor activity	--	--
Cluster-242496.105141	K17550	PPP1R7, SDS22	protein phosphatase 1 regulatory subunit 7	http://www.genome.jp/dbget-bin/www_bget?ko:K17550	Q32PL1	227	3.60E-17	Protein phosphatase 1 regulatory subunit 7 OS=Danio rerio GN=ppp1r7 PE=2 SV=1	PF00560//PF13855//PF03790	Leucine Rich Repeat//Leucine rich repeat//KNOX1 domain	--	--	GO:0005515//GO:0003677	protein binding//DNA binding	GO:0005634	nucleus
Cluster-242496.92067	--	--	--	--	--	--	--	--	PF09788	Transmembrane protein 55A	GO:0046856	phosphatidylinositol dephosphorylation	GO:0034597	phosphatidylinositol-4,5-bisphosphate 4-phosphatase activity	--	--
Cluster-242496.104997	--	--	--	--	P42739	148	1.10E-07	Polyubiquitin (Fragment) OS=Acetabularia peniculus PE=3 SV=2	PF00085//PF00240	Thioredoxin//Ubiquitin family	GO:0045454	cell redox homeostasis	GO:0005515	protein binding	--	--
Cluster-242496.104007	K10260	FBXW7, SEL10	F-box and WD-40 domain protein 7	http://www.genome.jp/dbget-bin/www_bget?ko:K10260	Q9LM76	306	5.50E-26	U-box domain-containing protein 44 OS=Arabidopsis thaliana GN=PUB44 PE=1 SV=1	PF11789//PF00514//PF04564//PF11698	Zinc-finger of the MIZ type in Nse subunit//Armadillo/beta-catenin-like repeat//U-box domain//V-ATPase subunit H	GO:0015991//GO:0016567	ATP hydrolysis coupled proton transport//protein ubiquitination	GO:0016820//GO:0008270//GO:0004842//GO:0005515	hydrolase activity, acting on acid anhydrides, catalyzing transmembrane movement of substances//zinc ion binding//ubiquitin-protein transferase activity//protein binding	GO:0000221	vacuolar proton-transporting V-type ATPase, V1 domain
Cluster-242496.111818	--	--	--	--	--	--	--	--	--	--	--	--	--	--	--	--
Cluster-242496.105737	--	--	--	--	Q9ZVT9	344	1.50E-30	C2 and GRAM domain-containing protein At1g03370 OS=Arabidopsis thaliana GN=At1g03370 PE=2 SV=4	PF04159	NB glycoprotein	--	--	--	--	GO:0016021	integral component of membrane
Cluster-242496.73065	--	--	--	--	--	--	--	--	--	--	--	--	--	--	--	--
Cluster-242496.89681	--	--	--	--	--	--	--	--	--	--	--	--	--	--	--	--
Cluster-242496.84971	--	--	--	--	--	--	--	--	PF09771//PF02536	Transmembrane protein 188//mTERF	GO:0035307//GO:0006355	positive regulation of protein dephosphorylation//regulation of transcription, DNA-templated	GO:0003690	double-stranded DNA binding	GO:0071595//GO:0005739	Nem1-Spo7 phosphatase complex//mitochondrion
Cluster-242496.81671	--	--	--	--	Q9SVA5	1244	5.30E-135	Pentatricopeptide repeat-containing protein At4g39530 OS=Arabidopsis thaliana GN=PCMP-E52 PE=3 SV=1	PF13374//PF00515//PF13762//PF13181//PF13414//PF13176//PF06743//PF17049	Tetratricopeptide repeat//Tetratricopeptide repeat//Mitochondrial splicing apparatus component//Tetratricopeptide repeat//TPR repeat//Tetratricopeptide repeat//FAST kinase-like protein, subdomain 1//ATPase expression protein 1	GO:0006417//GO:0000372	regulation of translation//Group I intron splicing	GO:0005515//GO:0004672//GO:0045182	protein binding//protein kinase activity//translation regulator activity	GO:0030529	intracellular ribonucleoprotein complex
Cluster-242496.108330	K01177	E3.2.1.2	beta-amylase	http://www.genome.jp/dbget-bin/www_bget?ko:K01177	Q9FM68	883	4.40E-93	Inactive beta-amylase 4, chloroplastic OS=Arabidopsis thaliana GN=BAM4 PE=2 SV=1	PF01373//PF07648	Glycosyl hydrolase family 14//Kazal-type serine protease inhibitor domain	GO:0000272//GO:0005985//GO:0005982	polysaccharide catabolic process//sucrose metabolic process//starch metabolic process	GO:0016161//GO:0005515	beta-amylase activity//protein binding	--	--
Cluster-242496.115712	--	--	--	--	Q9LDD4	288	3.20E-24	AT-rich interactive domain-containing protein 2 OS=Arabidopsis thaliana GN=ARID2 PE=2 SV=1	PF01388	ARID/BRIGHT DNA binding domain	--	--	GO:0003677	DNA binding	--	--
Cluster-242496.102393	--	--	--	--	Q9LXA5	1188	1.20E-128	L-type lectin-domain containing receptor kinase IX.1 OS=Arabidopsis thaliana GN=LECRK91 PE=2 SV=1	PF00069//PF00139//PF07714	Protein kinase domain//Legume lectin domain//Protein tyrosine kinase	GO:0006468	protein phosphorylation	GO:0005524//GO:0004672//GO:0030246	ATP binding//protein kinase activity//carbohydrate binding	--	--
Cluster-242496.89351	K10520	ABTB1, BPOZ	ankyrin repeat and BTB/POZ domain-containing protein 1	http://www.genome.jp/dbget-bin/www_bget?ko:K10520	Q9SJ85	1082	3.60E-116	BTB/POZ domain-containing protein At2g04740 OS=Arabidopsis thaliana GN=At2g04740 PE=2 SV=2	PF00651//PF13606//PF00023//PF15168	BTB/POZ domain//Ankyrin repeat//Ankyrin repeat//Triple QxxK/R motif-containing protein family	--	--	GO:0005515	protein binding	GO:0005789	endoplasmic reticulum membrane
Cluster-242496.85104	--	--	--	--	O66878	264	4.30E-21	Chromosome partition protein Smc OS=Aquifex aeolicus (strain VF5) GN=smc PE=3 SV=1	PF06470//PF13304//PF00005	SMC proteins Flexible Hinge Domain//AAA domain, putative AbiEii toxin, Type IV TA system//ABC transporter	GO:0051276	chromosome organization	GO:0016887//GO:0005515//GO:0005524	ATPase activity//protein binding//ATP binding	GO:0005694	chromosome
Cluster-242496.123342	--	--	--	--	Q9SVP7	1439	1.40E-157	Pentatricopeptide repeat-containing protein At4g13650 OS=Arabidopsis thaliana GN=PCMP-H42 PE=2 SV=2	PF09117//PF02545//PF13414//PF17049	MiAMP1//Maf-like protein//TPR repeat//ATPase expression protein 1	GO:0045926//GO:0006417//GO:0006952	negative regulation of growth//regulation of translation//defense response	GO:0045182//GO:0005515	translation regulator activity//protein binding	GO:0005737	cytoplasm
Cluster-242496.66318	K11699	RDR, RDRP	RNA-dependent RNA polymerase	http://www.genome.jp/dbget-bin/www_bget?ko:K11699	Q9LQV2	2482	1.90E-278	RNA-dependent RNA polymerase 1 OS=Arabidopsis thaliana GN=RDR1 PE=2 SV=1	PF05183//PF01020//PF03092	RNA dependent RNA polymerase//Ribosomal L40e family//BT1 family	GO:0006412//GO:0006810//GO:0006144//GO:0042254	translation//transport//purine nucleobase metabolic process//ribosome biogenesis	GO:0003735//GO:0003968	structural constituent of ribosome//RNA-directed RNA polymerase activity	GO:0031379//GO:0016021//GO:0005840	RNA-directed RNA polymerase complex//integral component of membrane//ribosome
Cluster-242496.109238	--	--	--	--	--	--	--	--	PF16719	SAWADEE domain	--	--	GO:0003682	chromatin binding	GO:0000785	chromatin
Cluster-242496.101524	K00599	METTL6	methyltransferase-like protein 6	http://www.genome.jp/dbget-bin/www_bget?ko:K00599	F4IB81	980	3.40E-104	LysM domain receptor-like kinase 3 OS=Arabidopsis thaliana GN=LYK3 PE=2 SV=1	PF01209//PF02390//PF07714//PF05175//PF01234//PF08241//PF00891//PF05401//PF05148//PF00069	ubiE/COQ5 methyltransferase family//Putative methyltransferase//Protein tyrosine kinase//Methyltransferase small domain//NNMT/PNMT/TEMT family//Methyltransferase domain//O-methyltransferase//Nodulation protein S (NodS)//Hypothetical methyltransferase//Protein kinase domain	GO:0008152//GO:0009312//GO:0009451//GO:0006400//GO:0006468//GO:0008033//GO:0009877	metabolic process//oligosaccharide biosynthetic process//RNA modification//tRNA modification//protein phosphorylation//tRNA processing//nodulation	GO:0008171//GO:0008168//GO:0005524//GO:0008176//GO:0004672//GO:0008757	O-methyltransferase activity//methyltransferase activity//ATP binding//tRNA (guanine-N7-)-methyltransferase activity//protein kinase activity//S-adenosylmethionine-dependent methyltransferase activity	--	--
Cluster-242496.69676	--	--	--	--	Q9LXD9	1114	4.30E-120	Probable pectinesterase/pectinesterase inhibitor 51 OS=Arabidopsis thaliana GN=PME51 PE=2 SV=1	PF04043//PF01095	Plant invertase/pectin methylesterase inhibitor//Pectinesterase	GO:0005982//GO:0042545//GO:0005985	starch metabolic process//cell wall modification//sucrose metabolic process	GO:0004857//GO:0030599	enzyme inhibitor activity//pectinesterase activity	GO:0005618	cell wall
Cluster-242496.73557	K01115	PLD1_2	phospholipase D1/2	http://www.genome.jp/dbget-bin/www_bget?ko:K01115	Q9C5Y0	1836	1.40E-203	Phospholipase D delta OS=Arabidopsis thaliana GN=PLDDELTA PE=1 SV=2	PF01480//PF00168//PF00614	PWI domain//C2 domain//Phospholipase D Active site motif	GO:0006397	mRNA processing	GO:0003824//GO:0005515	catalytic activity//protein binding	--	--
Cluster-242496.71599	--	--	--	--	--	--	--	--	PF04689	DNA binding protein S1FA	GO:0006355	regulation of transcription, DNA-templated	GO:0003677	DNA binding	GO:0005634	nucleus
Cluster-242496.99779	K10891	FANCD2	fanconi anemia group D2 protein	http://www.genome.jp/dbget-bin/www_bget?ko:K10891	Q9BXW9	887	2.50E-93	Fanconi anemia group D2 protein OS=Homo sapiens GN=FANCD2 PE=1 SV=2	PF14631	Fanconi anaemia protein FancD2 nuclease	GO:0006281	DNA repair	--	--	--	--
Cluster-242496.108312	--	--	--	--	--	--	--	--	--	--	--	--	--	--	--	--
Cluster-242496.96295	--	--	--	--	Q6DR24	136	1.40E-06	Uncharacterized protein At3g17950 OS=Arabidopsis thaliana GN=Y-3 PE=1 SV=1	--	--	--	--	--	--	--	--
Cluster-242496.100509	K00799	GST, gst	glutathione S-transferase	http://www.genome.jp/dbget-bin/www_bget?ko:K00799	Q9LZ06	281	6.00E-24	Glutathione S-transferase L3 OS=Arabidopsis thaliana GN=GSTL3 PE=2 SV=1	PF02798//PF13409//PF13417	Glutathione S-transferase, N-terminal domain//Glutathione S-transferase, N-terminal domain//Glutathione S-transferase, N-terminal domain	--	--	GO:0005515	protein binding	--	--
Cluster-242496.111070	--	--	--	--	Q6XKE6	287	3.30E-24	Genome polyprotein OS=Petunia vein clearing virus (isolate Hohn) PE=3 SV=1	PF11722	CCCH zinc finger in TRM13 protein	--	--	GO:0008168	methyltransferase activity	--	--
Cluster-242496.105610	--	--	--	--	--	--	--	--	--	--	--	--	--	--	--	--
Cluster-242496.105385	--	--	--	--	--	--	--	--	--	--	--	--	--	--	--	--
Cluster-242496.87085	--	--	--	--	Q9SZ10	1044	6.40E-112	Pentatricopeptide repeat-containing protein At4g26680, mitochondrial OS=Arabidopsis thaliana GN=At4g26680 PE=2 SV=1	PF13176//PF17049//PF09106//PF13374	Tetratricopeptide repeat//ATPase expression protein 1//Elongation factor SelB, winged helix//Tetratricopeptide repeat	GO:0006448//GO:0006417//GO:0001514	regulation of translational elongation//regulation of translation//selenocysteine incorporation	GO:0003723//GO:0005515//GO:0045182//GO:0003746//GO:0005525	RNA binding//protein binding//translation regulator activity//translation elongation factor activity//GTP binding	GO:0005737//GO:0005840	cytoplasm//ribosome
Cluster-242496.106820	K14544	UTP22, NOL6	U3 small nucleolar RNA-associated protein 22	http://www.genome.jp/dbget-bin/www_bget?ko:K14544	Q6NRY2	722	3.10E-74	Nucleolar protein 6 OS=Xenopus laevis GN=nol6 PE=2 SV=2	PF09107//PF13303	Elongation factor SelB, winged helix//Phosphotransferase system, EIIC	GO:0001514//GO:0009401//GO:0008643//GO:0006448	selenocysteine incorporation//phosphoenolpyruvate-dependent sugar phosphotransferase system//carbohydrate transport//regulation of translational elongation	GO:0003746//GO:0005525//GO:0008982//GO:0003723	translation elongation factor activity//GTP binding//protein-N(PI)-phosphohistidine-sugar phosphotransferase activity//RNA binding	GO:0005840//GO:0009357//GO:0016020//GO:0005737	ribosome//protein-N(PI)-phosphohistidine-sugar phosphotransferase complex//membrane//cytoplasm
Cluster-242496.108373	K01893	NARS, asnS	asparaginyl-tRNA synthetase	http://www.genome.jp/dbget-bin/www_bget?ko:K01893	O48593	1905	1.00E-211	Asparagine--tRNA ligase, chloroplastic/mitochondrial OS=Arabidopsis thaliana GN=SYNO PE=2 SV=3	PF00152//PF01409	tRNA synthetases class II (D, K and N)//tRNA synthetases class II core domain (F)	GO:0043039//GO:0006418	tRNA aminoacylation//tRNA aminoacylation for protein translation	GO:0000049//GO:0004812//GO:0005524//GO:0000166	tRNA binding//aminoacyl-tRNA ligase activity//ATP binding//nucleotide binding	GO:0005737	cytoplasm
Cluster-242496.73183	--	--	--	--	Q9SVA5	1189	1.20E-128	Pentatricopeptide repeat-containing protein At4g39530 OS=Arabidopsis thaliana GN=PCMP-E52 PE=3 SV=1	PF09477//PF17049	Bacterial type II secretion system chaperone protein (type_III_yscG)//ATPase expression protein 1	GO:0006417//GO:0009405	regulation of translation//pathogenesis	GO:0045182	translation regulator activity	--	--
Cluster-242496.74947	--	--	--	--	P35580	244	4.60E-19	Myosin-10 OS=Homo sapiens GN=MYH10 PE=1 SV=3	--	--	--	--	--	--	--	--
Cluster-242496.160623	--	--	--	--	Q9SY02	1307	2.50E-142	Pentatricopeptide repeat-containing protein At4g02750 OS=Arabidopsis thaliana GN=PCMP-H24 PE=3 SV=1	PF13374//PF13414	Tetratricopeptide repeat//TPR repeat	--	--	GO:0005515	protein binding	--	--
Cluster-242496.72536	--	--	--	--	--	--	--	--	--	--	--	--	--	--	--	--
Cluster-242496.100668	--	--	--	--	Q9LK64	3962	0.00E+00	ABC transporter C family member 3 OS=Arabidopsis thaliana GN=ABCC3 PE=1 SV=1	PF00735//PF00060//PF00321//PF03193//PF00437//PF00664//PF01580//PF06414//PF13304//PF01926//PF00005//PF00931//PF01443	Septin//Ligand-gated ion channel//Plant thionin//Protein of unknown function, DUF258//Type II/IV secretion system protein//ABC transporter transmembrane region//FtsK/SpoIIIE family//Zeta toxin//AAA domain, putative AbiEii toxin, Type IV TA system//50S ribosome-binding GTPase//ABC transporter//NB-ARC domain//Viral (Superfamily 1) RNA helicase	GO:0006810//GO:0006811//GO:0007268//GO:0007165//GO:0055085//GO:0006952	transport//ion transport//synaptic transmission//signal transduction//transmembrane transport//defense response	GO:0004970//GO:0003677//GO:0005525//GO:0016887//GO:0016301//GO:0042626//GO:0005524//GO:0000166//GO:0043531//GO:0003924	ionotropic glutamate receptor activity//DNA binding//GTP binding//ATPase activity//kinase activity//ATPase activity, coupled to transmembrane movement of substances//ATP binding//nucleotide binding//ADP binding//GTPase activity	GO:0016021//GO:0016020	integral component of membrane//membrane
Cluster-242496.107858	--	--	--	--	Q9XGA0	1342	1.70E-146	Ribose-phosphate pyrophosphokinase 3, mitochondrial OS=Spinacia oleracea GN=PRS3 PE=2 SV=1	PF00156//PF14572//PF05933	Phosphoribosyl transferase domain//Phosphoribosyl synthetase-associated domain//Fungal ATP synthase protein 8 (A6L)	GO:0006144//GO:0009165//GO:0009116//GO:0015986//GO:0006098//GO:0015992	purine nucleobase metabolic process//nucleotide biosynthetic process//nucleoside metabolic process//ATP synthesis coupled proton transport//pentose-phosphate shunt//proton transport	GO:0000287//GO:0004749//GO:0015078	magnesium ion binding//ribose phosphate diphosphokinase activity//hydrogen ion transmembrane transporter activity	GO:0000276	mitochondrial proton-transporting ATP synthase complex, coupling factor F(o)
Cluster-242496.64129	--	--	--	--	--	--	--	--	PF06423	GWT1	GO:0006506	GPI anchor biosynthetic process	GO:0016746	transferase activity, transferring acyl groups	GO:0016021//GO:0005789	integral component of membrane//endoplasmic reticulum membrane
Cluster-242496.109830	--	--	--	--	Q0WR59	1451	1.10E-158	Probable inactive receptor kinase At5g10020 OS=Arabidopsis thaliana GN=At5g10020 PE=1 SV=2	PF13855//PF07714//PF00069//PF00560	Leucine rich repeat//Protein tyrosine kinase//Protein kinase domain//Leucine Rich Repeat	GO:0006468	protein phosphorylation	GO:0005524//GO:0004672//GO:0005515	ATP binding//protein kinase activity//protein binding	--	--
Cluster-242496.109604	--	--	--	--	Q9SV26	1537	5.60E-169	Pentatricopeptide repeat-containing protein At4g01030, mitochondrial OS=Arabidopsis thaliana GN=PCMP-H65 PE=3 SV=2	PF03854//PF00619//PF11057	P-11 zinc finger//Caspase recruitment domain//Cortexin of kidney	GO:0042981	regulation of apoptotic process	GO:0003723//GO:0008270	RNA binding//zinc ion binding	GO:0031224	intrinsic component of membrane
Cluster-242496.117567	--	--	--	--	--	--	--	--	--	--	--	--	--	--	--	--
Cluster-242496.110091	K00791	miaA, TRIT1	tRNA dimethylallyltransferase	http://www.genome.jp/dbget-bin/www_bget?ko:K00791	Q9C5J6	783	1.00E-81	tRNA dimethylallyltransferase 9 OS=Arabidopsis thaliana GN=IPT9 PE=2 SV=1	PF01715//PF07475//PF00519//PF02224//PF01745	IPP transferase//HPr Serine kinase C-terminal domain//Papillomavirus helicase//Cytidylate kinase//Isopentenyl transferase	GO:0008033//GO:0000160//GO:0016114//GO:0006139//GO:0009058//GO:0006694//GO:0006260//GO:0006109//GO:0016310//GO:0006206	tRNA processing//phosphorelay signal transduction system//terpenoid biosynthetic process//nucleobase-containing compound metabolic process//biosynthetic process//steroid biosynthetic process//DNA replication//regulation of carbohydrate metabolic process//phosphorylation//pyrimidine nucleobase metabolic process	GO:0000155//GO:0003677//GO:0004672//GO:0004127//GO:0004003//GO:0004161//GO:0005524	phosphorelay sensor kinase activity//DNA binding//protein kinase activity//cytidylate kinase activity//ATP-dependent DNA helicase activity//dimethylallyltranstransferase activity//ATP binding	GO:0009365//GO:0005657	protein histidine kinase complex//replication fork
Cluster-242496.130124	--	--	--	--	--	--	--	--	PF02536	mTERF	GO:0006355	regulation of transcription, DNA-templated	GO:0003690	double-stranded DNA binding	GO:0005739	mitochondrion
Cluster-242496.94879	--	--	--	--	--	--	--	--	--	--	--	--	--	--	--	--
Cluster-242496.94020	K15397	KCS	3-ketoacyl-CoA synthase	http://www.genome.jp/dbget-bin/www_bget?ko:K15397	Q9LN49	1063	3.50E-114	3-ketoacyl-CoA synthase 4 OS=Arabidopsis thaliana GN=KCS4 PE=2 SV=1	PF08545//PF08392//PF08541	3-Oxoacyl-[acyl-carrier-protein (ACP)] synthase III//FAE1/Type III polyketide synthase-like protein//3-Oxoacyl-[acyl-carrier-protein (ACP)] synthase III C terminal	GO:0008610//GO:0006633//GO:0042967	lipid biosynthetic process//fatty acid biosynthetic process//acyl-carrier-protein biosynthetic process	GO:0004315//GO:0016747	3-oxoacyl-[acyl-carrier-protein] synthase activity//transferase activity, transferring acyl groups other than amino-acyl groups	GO:0005835//GO:0016020	fatty acid synthase complex//membrane
Cluster-242496.88815	--	--	--	--	P0C897	206	1.10E-14	Putative UPF0481 protein At3g02645 OS=Arabidopsis thaliana GN=At3g02645 PE=3 SV=1	PF12761//PF02724//PF00008//PF09514	Actin cytoskeleton-regulatory complex protein END3//CDC45-like protein//EGF-like domain//SSXRD motif	GO:0006355//GO:0007015//GO:0006897//GO:0006270	regulation of transcription, DNA-templated//actin filament organization//endocytosis//DNA replication initiation	GO:0005515	protein binding	GO:0005634	nucleus
Cluster-242496.119578	--	--	--	--	--	--	--	--	--	--	--	--	--	--	--	--
Cluster-242496.91599	--	--	--	--	F4K2F0	186	1.90E-12	Protein EMSY-LIKE 3 OS=Arabidopsis thaliana GN=EML3 PE=1 SV=1	--	--	--	--	--	--	--	--
Cluster-242496.97723	--	--	--	--	--	--	--	--	PF00610//PF07284//PF00462	Domain found in Dishevelled, Egl-10, and Pleckstrin (DEP)//2-vinyl bacteriochlorophyllide hydratase (BCHF)//Glutaredoxin	GO:0045454//GO:0030494//GO:0035556//GO:0019685//GO:0006118	cell redox homeostasis//bacteriochlorophyll biosynthetic process//intracellular signal transduction//photosynthesis, dark reaction//obsolete electron transport	GO:0015035//GO:0016836//GO:0009055	protein disulfide oxidoreductase activity//hydro-lyase activity//electron carrier activity	--	--
Cluster-242496.99631	--	--	--	--	--	--	--	--	PF02485	Core-2/I-Branching enzyme	--	--	GO:0008375	acetylglucosaminyltransferase activity	GO:0016020	membrane
Cluster-242496.102675	--	--	--	--	--	--	--	--	PF09402//PF00584	Man1-Src1p-C-terminal domain//SecE/Sec61-gamma subunits of protein translocation complex	GO:0006605//GO:0006886	protein targeting//intracellular protein transport	--	--	GO:0016020//GO:0005639	membrane//integral component of nuclear inner membrane
Cluster-242496.110228	K09191	GTF3A	general transcription factor IIIA	http://www.genome.jp/dbget-bin/www_bget?ko:K09191	P34694	150	3.40E-09	Transcription factor IIIA OS=Anaxyrus americanus GN=gtf3a PE=2 SV=1	PF00096//PF13465	Zinc finger, C2H2 type//Zinc-finger double domain	--	--	GO:0046872	metal ion binding	--	--
Cluster-242496.77234	--	--	--	--	--	--	--	--	--	--	--	--	--	--	--	--
Cluster-242496.102569	K12638	CYP90D1	3-epi-6-deoxocathasterone 23-monooxygenase	http://www.genome.jp/dbget-bin/www_bget?ko:K12638	Q94IW5	1216	5.20E-132	Cytochrome P450 90D2 OS=Oryza sativa subsp. japonica GN=CYP90D2 PE=1 SV=1	PF00067	Cytochrome P450	GO:0055114	oxidation-reduction process	GO:0016705//GO:0005506//GO:0020037	oxidoreductase activity, acting on paired donors, with incorporation or reduction of molecular oxygen//iron ion binding//heme binding	--	--
Cluster-242496.88015	K01784	galE, GALE	UDP-glucose 4-epimerase	http://www.genome.jp/dbget-bin/www_bget?ko:K01784	B0M3E8	1338	4.70E-146	Bifunctional UDP-glucose 4-epimerase and UDP-xylose 4-epimerase 1 OS=Pisum sativum GN=UGE1 PE=1 SV=2	PF02737//PF00106//PF01073//PF00738//PF01370	3-hydroxyacyl-CoA dehydrogenase, NAD binding domain//short chain dehydrogenase//3-beta hydroxysteroid dehydrogenase/isomerase family//Polyhedrin//NAD dependent epimerase/dehydratase family	GO:0008209//GO:0055114//GO:0008207//GO:0006554//GO:0008210//GO:0006574//GO:0018874//GO:0006633//GO:0006552//GO:0006568//GO:0006550//GO:0006631//GO:0006694//GO:0008152	androgen metabolic process//oxidation-reduction process//C21-steroid hormone metabolic process//lysine catabolic process//estrogen metabolic process//valine catabolic process//benzoate metabolic process//fatty acid biosynthetic process//leucine catabolic process//tryptophan metabolic process//isoleucine catabolic process//fatty acid metabolic process//steroid biosynthetic process//metabolic proce…	GO:0016491//GO:0050662//GO:0003857//GO:0016616//GO:0003824//GO:0003854//GO:0005198	oxidoreductase activity//coenzyme binding//3-hydroxyacyl-CoA dehydrogenase activity//oxidoreductase activity, acting on the CH-OH group of donors, NAD or NADP as acceptor//catalytic activity//3-beta-hydroxy-delta5-steroid dehydrogenase activity//structural molecule activity	--	--
Cluster-242496.85757	--	--	--	--	Q2ILG1	164	1.70E-09	Endoribonuclease YbeY OS=Anaeromyxobacter dehalogenans (strain 2CP-C) GN=ybeY PE=3 SV=1	PF02130//PF00258//PF01243//PF06056	Uncharacterized protein family UPF0054//Flavodoxin//Pyridoxamine 5'-phosphate oxidase//Putative ATPase subunit of terminase (gpP-like)	GO:0019069//GO:0008615//GO:0006364//GO:0055114	viral capsid assembly//pyridoxine biosynthetic process//rRNA processing//oxidation-reduction process	GO:0005524//GO:0004222//GO:0010181//GO:0004733	ATP binding//metalloendopeptidase activity//FMN binding//pyridoxamine-phosphate oxidase activity	--	--
Cluster-242496.100970	--	--	--	--	Q9FFZ1	688	3.20E-70	Pheophytinase, chloroplastic OS=Arabidopsis thaliana GN=PPH PE=1 SV=1	PF02230	Phospholipase/Carboxylesterase	--	--	GO:0016787	hydrolase activity	--	--
Cluster-242496.65882	--	--	--	--	Q9M8L2	142	1.10E-07	F-box/kelch-repeat protein At1g80440 OS=Arabidopsis thaliana GN=At1g80440 PE=2 SV=1	PF01344//PF00646//PF07646//PF12937	Kelch motif//F-box domain//Kelch motif//F-box-like	--	--	GO:0005515	protein binding	--	--
Cluster-242496.88333	--	--	--	--	--	--	--	--	PF01141	Gag polyprotein, inner coat protein p12	--	--	--	--	GO:0019028	viral capsid
Cluster-242496.112674	--	--	--	--	--	--	--	--	--	--	--	--	--	--	--	--
Cluster-242496.4826	--	--	--	--	--	--	--	--	--	--	--	--	--	--	--	--
Cluster-242496.51214	--	--	--	--	Q8W486	483	9.10E-47	Uncharacterized protein At1g04910 OS=Arabidopsis thaliana GN=At1g04910 PE=2 SV=1	--	--	--	--	--	--	--	--
Cluster-242496.109468	--	--	--	--	Q9LFE4	212	2.40E-15	WEB family protein At5g16730, chloroplastic OS=Arabidopsis thaliana GN=At5g16730 PE=1 SV=1	PF02151//PF00160	UvrB/uvrC motif//Cyclophilin type peptidyl-prolyl cis-trans isomerase/CLD	GO:0000413//GO:0006457	protein peptidyl-prolyl isomerization//protein folding	GO:0005515//GO:0003755	protein binding//peptidyl-prolyl cis-trans isomerase activity	--	--
Cluster-242496.74031	--	--	--	--	Q9SUH6	239	4.70E-19	Pentatricopeptide repeat-containing protein At4g30700 OS=Arabidopsis thaliana GN=DYW9 PE=2 SV=1	--	--	--	--	--	--	--	--
Cluster-242496.121988	--	--	--	--	Q40392	360	4.00E-33	TMV resistance protein N OS=Nicotiana glutinosa GN=N PE=1 SV=1	PF00931	NB-ARC domain	--	--	GO:0043531	ADP binding	--	--
Cluster-242496.119415	--	--	--	--	Q9SY02	1523	2.30E-167	Pentatricopeptide repeat-containing protein At4g02750 OS=Arabidopsis thaliana GN=PCMP-H24 PE=3 SV=1	PF00515	Tetratricopeptide repeat	--	--	GO:0005515	protein binding	--	--
Cluster-242496.101197	K01599	hemE, UROD	uroporphyrinogen decarboxylase	http://www.genome.jp/dbget-bin/www_bget?ko:K01599	Q42967	758	2.10E-78	Uroporphyrinogen decarboxylase, chloroplastic OS=Nicotiana tabacum GN=DCUP PE=1 SV=1	PF01208//PF06482	Uroporphyrinogen decarboxylase (URO-D)//Collagenase NC10 and Endostatin	GO:0007155//GO:0006779//GO:0015994	cell adhesion//porphyrin-containing compound biosynthetic process//chlorophyll metabolic process	GO:0005198//GO:0004853	structural molecule activity//uroporphyrinogen decarboxylase activity	GO:0031012	extracellular matrix
Cluster-242496.88697	K05387	GRIP	glutamate receptor, ionotropic, plant	http://www.genome.jp/dbget-bin/www_bget?ko:K05387	Q8GXJ4	2093	2.50E-233	Glutamate receptor 3.4 OS=Arabidopsis thaliana GN=GLR3.4 PE=2 SV=2	PF10613//PF00060	Ligated ion channel L-glutamate- and glycine-binding site//Ligand-gated ion channel	GO:0007165//GO:0007268//GO:0006811	signal transduction//synaptic transmission//ion transport	GO:0005234//GO:0004970	extracellular-glutamate-gated ion channel activity//ionotropic glutamate receptor activity	GO:0016020	membrane
Cluster-242496.74606	--	--	--	--	Q0WVK7	1376	3.10E-150	Pentatricopeptide repeat-containing protein At1g05670, mitochondrial OS=Arabidopsis thaliana GN=At1g05670 PE=2 SV=1	PF00637//PF13414//PF00515//PF13374	Region in Clathrin and VPS//TPR repeat//Tetratricopeptide repeat//Tetratricopeptide repeat	GO:0016192//GO:0006886	vesicle-mediated transport//intracellular protein transport	GO:0005515	protein binding	--	--
Cluster-242496.80412	--	--	--	--	P28814	156	7.40E-09	Barwin OS=Hordeum vulgare PE=1 SV=1	PF08115	SFI toxin family	GO:0009405	pathogenesis	--	--	GO:0005576	extracellular region
Cluster-242496.90982	K10534	NR	nitrate reductase (NAD(P)H)	http://www.genome.jp/dbget-bin/www_bget?ko:K10534	P43101	438	2.30E-41	Nitrate reductase [NADH] OS=Cichorium intybus GN=NIA PE=2 SV=1	PF00174	Oxidoreductase molybdopterin binding domain	GO:0042128	nitrate assimilation	--	--	--	--
Cluster-242496.75754	--	--	--	--	F4I2H7	176	3.90E-11	Protein TPX2 OS=Arabidopsis thaliana GN=TPX2 PE=1 SV=1	--	--	--	--	--	--	--	--
Cluster-242496.87316	--	--	--	--	--	--	--	--	--	--	--	--	--	--	--	--
Cluster-242496.106448	--	--	--	--	Q94AD8	825	2.70E-86	F-box/WD-40 repeat-containing protein At5g21040 OS=Arabidopsis thaliana GN=At5g21040 PE=2 SV=1	PF12937//PF00400//PF00646	F-box-like//WD domain, G-beta repeat//F-box domain	--	--	GO:0005515	protein binding	--	--
Cluster-242496.114709	--	--	--	--	--	--	--	--	--	--	--	--	--	--	--	--
Cluster-242496.97565	K02922	RP-L37e, RPL37	large subunit ribosomal protein L37e	http://www.genome.jp/dbget-bin/www_bget?ko:K02922	Q8LEM8	221	2.80E-16	60S ribosomal protein L37-3 OS=Arabidopsis thaliana GN=RPL37C PE=3 SV=1	--	--	--	--	--	--	--	--
Cluster-242496.113581	K00558	DNMT1, dcm	DNA (cytosine-5)-methyltransferase 1	http://www.genome.jp/dbget-bin/www_bget?ko:K00558	B1Q3J6	2030	6.60E-226	DNA (cytosine-5)-methyltransferase 1B OS=Oryza sativa subsp. japonica GN=MET1B PE=2 SV=1	PF13718//PF01429//PF01426	GNAT acetyltransferase 2//Methyl-CpG binding domain//BAH domain	GO:0042967	acyl-carrier-protein biosynthetic process	GO:0008080//GO:0003677//GO:0003682	N-acetyltransferase activity//DNA binding//chromatin binding	GO:0005634//GO:0000785	nucleus//chromatin
Cluster-242496.92348	K02183	CALM	calmodulin	http://www.genome.jp/dbget-bin/www_bget?ko:K02183	P07463	292	2.60E-25	Calmodulin OS=Paramecium tetraurelia GN=CAM PE=1 SV=3	PF13405//PF13202//PF13499//PF00036//PF13833//PF01204	EF-hand domain//EF hand//EF-hand domain pair//EF hand//EF-hand domain pair//Trehalase	GO:0005991//GO:0005982//GO:0005985	trehalose metabolic process//starch metabolic process//sucrose metabolic process	GO:0004555//GO:0005509	alpha,alpha-trehalase activity//calcium ion binding	--	--
Cluster-242496.35081	K11253	H3	histone H3	http://www.genome.jp/dbget-bin/www_bget?ko:K11253	P68428	673	1.80E-69	Histone H3.2 OS=Triticum aestivum PE=1 SV=2	PF02291//PF15715//PF00125	Transcription initiation factor IID, 31kD subunit//PCNA-associated factor//Core histone H2A/H2B/H3/H4	GO:0006974//GO:0051726//GO:0006352	cellular response to DNA damage stimulus//regulation of cell cycle//DNA-templated transcription, initiation	GO:0003677	DNA binding	--	--
Cluster-242496.93415	--	--	--	--	Q9T0H9	654	1.60E-66	GDT1-like protein 2, chloroplastic OS=Arabidopsis thaliana GN=At4g13590 PE=1 SV=2	PF05923//PF01169//PF00098	APC cysteine-rich region//Uncharacterized protein family UPF0016//Zinc knuckle	GO:0016055	Wnt signaling pathway	GO:0008270//GO:0003676	zinc ion binding//nucleic acid binding	GO:0016020	membrane
Cluster-242496.112902	--	--	--	--	--	--	--	--	PF00196//PF05326	Bacterial regulatory proteins, luxR family//Seminal vesicle autoantigen (SVA)	GO:0006355	regulation of transcription, DNA-templated	--	--	GO:0005576	extracellular region
Cluster-242496.88714	--	--	--	--	Q8L9J9	676	2.70E-69	Probable carbohydrate esterase At4g34215 OS=Arabidopsis thaliana GN=At4g34215 PE=1 SV=2	PF01907	Ribosomal protein L37e	GO:0006412//GO:0042254	translation//ribosome biogenesis	GO:0003735	structural constituent of ribosome	GO:0005622//GO:0005840	intracellular//ribosome
Cluster-242496.97613	--	--	--	--	Q40392	196	5.70E-14	TMV resistance protein N OS=Nicotiana glutinosa GN=N PE=1 SV=1	PF13516	Leucine Rich repeat	--	--	GO:0005515	protein binding	--	--
Cluster-242496.105100	--	--	--	--	O49303	131	5.10E-06	Protein C2-DOMAIN ABA-RELATED 8 OS=Arabidopsis thaliana GN=CAR8 PE=2 SV=1	PF03859//PF00168//PF11093	CG-1 domain//C2 domain//Mitochondrial export protein Som1	--	--	GO:0003677//GO:0005515	DNA binding//protein binding	GO:0005634//GO:0042720	nucleus//mitochondrial inner membrane peptidase complex
Cluster-242496.78341	--	--	--	--	O22929	269	2.00E-22	Biogenesis of lysosome-related organelles complex 1 subunit 1 OS=Arabidopsis thaliana GN=BLOS1 PE=1 SV=1	PF06320	GCN5-like protein 1 (GCN5L1)	--	--	--	--	GO:0031083	BLOC-1 complex
Cluster-242496.93658	--	--	--	--	F4I6M4	135	2.10E-06	Microtubule-associated protein SPIRAL2-like OS=Arabidopsis thaliana GN=SP2L PE=2 SV=1	--	--	--	--	--	--	--	--
Cluster-242496.85463	--	--	--	--	--	--	--	--	--	--	--	--	--	--	--	--
Cluster-242496.109893	--	--	--	--	Q8RWD5	560	8.40E-56	Coiled-coil domain-containing protein SCD2 OS=Arabidopsis thaliana GN=SCD2 PE=1 SV=1	PF04111	Autophagy protein Apg6	GO:0006914	autophagy	--	--	--	--
Cluster-242496.75664	K10631	TOPORS	E3 ubiquitin-protein ligase Topors	http://www.genome.jp/dbget-bin/www_bget?ko:K10631	Q9NS56	156	4.10E-09	E3 ubiquitin-protein ligase Topors OS=Homo sapiens GN=TOPORS PE=1 SV=1	PF13639//PF12861//PF16685//PF06560//PF00097//PF12678//PF14634//PF17123//PF01480	Ring finger domain//Anaphase-promoting complex subunit 11 RING-H2 finger//zinc RING finger of MSL2//Glucose-6-phosphate isomerase (GPI)//Zinc finger, C3HC4 type (RING finger)//RING-H2 zinc finger//zinc-RING finger domain//RING-like zinc finger//PWI domain	GO:0006096//GO:0016567//GO:0005982//GO:0006094//GO:0005985//GO:0006098//GO:0006397	glycolytic process//protein ubiquitination//starch metabolic process//gluconeogenesis//sucrose metabolic process//pentose-phosphate shunt//mRNA processing	GO:0061630//GO:0046872//GO:0004347//GO:0004842//GO:0005515//GO:0008270	ubiquitin protein ligase activity//metal ion binding//glucose-6-phosphate isomerase activity//ubiquitin-protein transferase activity//protein binding//zinc ion binding	GO:0005737//GO:0005680	cytoplasm//anaphase-promoting complex
Cluster-242496.111402	--	--	--	--	Q3L181	328	2.90E-29	Perakine reductase OS=Rauvolfia serpentina GN=PR PE=1 SV=1	--	--	--	--	--	--	--	--
Cluster-242496.88306	K11799	WDR21A	WD repeat-containing protein 21A	http://www.genome.jp/dbget-bin/www_bget?ko:K11799	Q8NA75	154	1.10E-08	DDB1- and CUL4-associated factor 4-like protein 2 OS=Homo sapiens GN=DCAF4L2 PE=1 SV=1	PF15332//PF00400	Lck-interacting transmembrane adapter 1//WD domain, G-beta repeat	GO:0050852//GO:0050853	T cell receptor signaling pathway//B cell receptor signaling pathway	GO:0005515	protein binding	--	--
Cluster-242496.111065	--	--	--	--	Q93Z38	1070	4.30E-115	Tryptophan aminotransferase-related protein 4 OS=Arabidopsis thaliana GN=TAR4 PE=2 SV=2	PF04864//PF00155//PF04863	Allinase//Aminotransferase class I and II//Alliinase EGF-like domain	GO:0009058	biosynthetic process	GO:0016846//GO:0030170	carbon-sulfur lyase activity//pyridoxal phosphate binding	--	--
Cluster-242496.125635	--	--	--	--	--	--	--	--	--	--	--	--	--	--	--	--
Cluster-242496.94824	--	--	--	--	--	--	--	--	PF07294	Fibroin P25	--	--	GO:0005198	structural molecule activity	GO:0005576	extracellular region
Cluster-242496.96355	K16573	TUBGCP6, GCP6	gamma-tubulin complex component 6	http://www.genome.jp/dbget-bin/www_bget?ko:K16573	Q96RT7	195	4.00E-13	Gamma-tubulin complex component 6 OS=Homo sapiens GN=TUBGCP6 PE=1 SV=3	PF04130	Spc97 / Spc98 family	GO:0090063//GO:0000226	positive regulation of microtubule nucleation//microtubule cytoskeleton organization	--	--	GO:0000922//GO:0005815	spindle pole//microtubule organizing center
Cluster-242496.148123	--	--	--	--	--	--	--	--	--	--	--	--	--	--	--	--
Cluster-242496.120336	K10727	CDT1	chromatin licensing and DNA replication factor 1	http://www.genome.jp/dbget-bin/www_bget?ko:K10727	Q9SJW9	369	1.40E-33	CDT1-like protein a, chloroplastic OS=Arabidopsis thaliana GN=CDT1A PE=1 SV=1	--	--	--	--	--	--	--	--
Cluster-242496.122480	--	--	--	--	--	--	--	--	--	--	--	--	--	--	--	--
Cluster-242496.75628	K02214	CDC7	cell division control protein 7	http://www.genome.jp/dbget-bin/www_bget?ko:K02214	Q54DK3	222	2.20E-16	Probable serine/threonine-protein kinase cdc7 OS=Dictyostelium discoideum GN=cdc7 PE=3 SV=1	PF10473//PF15225//PF00069//PF07714//PF06293	Leucine-rich repeats of kinetochore protein Cenp-F/LEK1//Interleukin 32//Protein kinase domain//Protein tyrosine kinase//Lipopolysaccharide kinase (Kdo/WaaP) family	GO:0006468//GO:0006955	protein phosphorylation//immune response	GO:0045502//GO:0042803//GO:0008134//GO:0004672//GO:0016773//GO:0005524	dynein binding//protein homodimerization activity//transcription factor binding//protein kinase activity//phosphotransferase activity, alcohol group as acceptor//ATP binding	GO:0030286//GO:0016020//GO:0005667	dynein complex//membrane//transcription factor complex
Cluster-242496.78746	--	--	--	--	Q93X17	248	7.50E-20	Snakin-2 OS=Solanum tuberosum GN=SN2 PE=1 SV=1	--	--	--	--	--	--	--	--
Cluster-242496.112603	--	--	--	--	Q39224	470	5.00E-45	Protein SRG1 OS=Arabidopsis thaliana GN=SRG1 PE=2 SV=1	PF11045//PF03171	Putative inner membrane protein of Enterobacteriaceae//2OG-Fe(II) oxygenase superfamily	GO:0055114	oxidation-reduction process	GO:0016491	oxidoreductase activity	GO:0016021	integral component of membrane
Cluster-242496.63463	--	--	--	--	--	--	--	--	--	--	--	--	--	--	--	--
Cluster-242496.86993	K14292	TGS1	trimethylguanosine synthase	http://www.genome.jp/dbget-bin/www_bget?ko:K14292	P85107	616	4.40E-62	Trimethylguanosine synthase OS=Rattus norvegicus GN=Tgs1 PE=1 SV=1	PF08241//PF02213//PF03602//PF00240//PF05175//PF14560//PF09445//PF00397	Methyltransferase domain//GYF domain//Conserved hypothetical protein 95//Ubiquitin family//Methyltransferase small domain//Ubiquitin-like domain//RNA cap guanine-N2 methyltransferase//WW domain	GO:0008152//GO:0001510//GO:0031167//GO:0009452	metabolic process//RNA methylation//rRNA methylation//7-methylguanosine RNA capping	GO:0008168//GO:0005515	methyltransferase activity//protein binding	--	--
Cluster-242496.117805	--	--	--	--	--	--	--	--	--	--	--	--	--	--	--	--
Cluster-242496.119137	--	--	--	--	--	--	--	--	--	--	--	--	--	--	--	--
Cluster-242496.73350	--	--	--	--	--	--	--	--	PF00420//PF02480//PF00337//PF13994//PF01213//PF05297//PF10099	NADH-ubiquinone/plastoquinone oxidoreductase chain 4L//Alphaherpesvirus glycoprotein E//Galactoside-binding lectin//PgaD-like protein//Adenylate cyclase associated (CAP) N terminal//Herpesvirus latent membrane protein 1 (LMP1)//Anti-sigma-K factor rskA	GO:0042773//GO:0042710//GO:0019087//GO:0055114//GO:0007010	ATP synthesis coupled electron transport//biofilm formation//transformation of host cell by virus//oxidation-reduction process//cytoskeleton organization	GO:0030246//GO:0003779//GO:0016651	carbohydrate binding//actin binding//oxidoreductase activity, acting on NAD(P)H	GO:0016020//GO:0016021//GO:0005886	membrane//integral component of membrane//plasma membrane
Cluster-242496.103547	--	--	--	--	Q8RYC8	368	3.00E-33	Auxin response factor 19 OS=Arabidopsis thaliana GN=ARF19 PE=1 SV=2	PF13414//PF04995//PF04153//PF09477//PF00515	TPR repeat//Heme exporter protein D (CcmD)//NOT2 / NOT3 / NOT5 family//Bacterial type II secretion system chaperone protein (type_III_yscG)//Tetratricopeptide repeat	GO:0017004//GO:0009405//GO:0015886//GO:0006355	cytochrome complex assembly//pathogenesis//heme transport//regulation of transcription, DNA-templated	GO:0005515	protein binding	GO:0016021//GO:0005634	integral component of membrane//nucleus
Cluster-242496.83652	--	--	--	--	B9EXZ6	791	1.40E-82	Amino-acid permease BAT1 homolog OS=Oryza sativa subsp. japonica GN=BAT1 PE=2 SV=1	PF00324//PF13520	Amino acid permease//Amino acid permease	GO:0006810//GO:0006865//GO:0003333//GO:0055085	transport//amino acid transport//amino acid transmembrane transport//transmembrane transport	GO:0015171	amino acid transmembrane transporter activity	GO:0016020	membrane
Cluster-242496.93041	K01487	E3.5.4.3, guaD	guanine deaminase	http://www.genome.jp/dbget-bin/www_bget?ko:K01487	P76641	750	8.80E-78	Guanine deaminase OS=Escherichia coli (strain K12) GN=guaD PE=1 SV=1	PF01979	Amidohydrolase family	--	--	GO:0016787	hydrolase activity	--	--
Cluster-242496.27202	--	--	--	--	--	--	--	--	PF01282	Ribosomal protein S24e	GO:0006412//GO:0042254	translation//ribosome biogenesis	GO:0003735	structural constituent of ribosome	GO:0005840//GO:0005622	ribosome//intracellular
Cluster-242496.72284	--	--	--	--	--	--	--	--	PF02170	PAZ domain	--	--	GO:0005515	protein binding	--	--
Cluster-242496.88619	--	--	--	--	--	--	--	--	PF02160	Cauliflower mosaic virus peptidase (A3)	GO:0006508	proteolysis	GO:0004190	aspartic-type endopeptidase activity	--	--
Cluster-242496.94801	--	--	--	--	Q6ZKL8	751	7.60E-78	Probable protein phosphatase 2C 66 OS=Oryza sativa subsp. japonica GN=Os08g0500300 PE=2 SV=1	PF03874//PF00481//PF06324	RNA polymerase Rpb4//Protein phosphatase 2C//Pigment-dispersing hormone (PDH)	GO:0007165//GO:0006351//GO:0009416//GO:0006144//GO:0006206	signal transduction//transcription, DNA-templated//response to light stimulus//purine nucleobase metabolic process//pyrimidine nucleobase metabolic process	GO:0003824//GO:0005179//GO:0003899	catalytic activity//hormone activity//DNA-directed RNA polymerase activity	GO:0005576//GO:0005730	extracellular region//nucleolus
Cluster-242496.102813	--	--	--	--	--	--	--	--	PF00514	Armadillo/beta-catenin-like repeat	--	--	GO:0005515	protein binding	--	--
Cluster-242496.106299	--	--	--	--	O81767	968	4.80E-103	Pentatricopeptide repeat-containing protein At4g33990 OS=Arabidopsis thaliana GN=EMB2758 PE=3 SV=2	PF02230	Phospholipase/Carboxylesterase	--	--	GO:0016787	hydrolase activity	--	--
Cluster-242496.113214	K08248	E4.1.2.10	mandelonitrile lyase	http://www.genome.jp/dbget-bin/www_bget?ko:K08248	O82784	643	9.80E-66	(R)-mandelonitrile lyase 4 OS=Prunus serotina GN=MDL4 PE=2 SV=1	PF00732//PF05199	GMC oxidoreductase//GMC oxidoreductase	GO:0055114	oxidation-reduction process	GO:0050660//GO:0016614	flavin adenine dinucleotide binding//oxidoreductase activity, acting on CH-OH group of donors	--	--
Cluster-242496.94276	--	--	--	--	Q54ST3	179	2.30E-11	DDT domain-containing protein DDB_G0282237 OS=Dictyostelium discoideum GN=DDB_G0282237 PE=3 SV=1	PF11538	Snurportin1	--	--	GO:0005515	protein binding	--	--
Cluster-242496.95401	--	--	--	--	Q9SRR1	759	1.20E-78	F-box/LRR-repeat protein 12 OS=Arabidopsis thaliana GN=FBL12 PE=2 SV=1	PF13516//PF00560//PF13855	Leucine Rich repeat//Leucine Rich Repeat//Leucine rich repeat	--	--	GO:0005515	protein binding	--	--
Cluster-242496.90116	K12836	U2AF1	splicing factor U2AF 35 kDa subunit	http://www.genome.jp/dbget-bin/www_bget?ko:K12836	Q9FMY5	416	1.20E-39	Splicing factor U2af small subunit B OS=Arabidopsis thaliana GN=U2AF35B PE=1 SV=1	PF00642	Zinc finger C-x8-C-x5-C-x3-H type (and similar)	--	--	GO:0046872	metal ion binding	--	--
Cluster-242496.104697	--	--	--	--	Q0VC80	477	2.80E-46	YrdC domain-containing protein, mitochondrial OS=Bos taurus GN=YRDC PE=2 SV=1	PF01300	Telomere recombination	--	--	GO:0003725	double-stranded RNA binding	--	--
Cluster-242496.90593	--	--	--	--	--	--	--	--	--	--	--	--	--	--	--	--
Cluster-242496.94153	--	--	--	--	Q9ZW12	222	1.60E-16	Tropinone reductase homolog At2g29260, chloroplastic OS=Arabidopsis thaliana GN=At2g29260 PE=2 SV=1	PF02285	Cytochrome oxidase c subunit VIII	GO:0015992//GO:0006123	proton transport//mitochondrial electron transport, cytochrome c to oxygen	GO:0004129	cytochrome-c oxidase activity	GO:0045277	respiratory chain complex IV
Cluster-242496.90006	--	--	--	--	--	--	--	--	PF06728	GPI transamidase subunit PIG-U	GO:0006506	GPI anchor biosynthetic process	--	--	GO:0016021	integral component of membrane
Cluster-242496.105155	--	--	--	--	O82702	152	7.30E-09	V-type proton ATPase subunit G 1 OS=Nicotiana tabacum GN=VATG1 PE=3 SV=1	PF13014//PF00013	KH domain//KH domain	--	--	GO:0003723	RNA binding	--	--
Cluster-242496.109259	K04733	IRAK4	interleukin-1 receptor-associated kinase 4	http://www.genome.jp/dbget-bin/www_bget?ko:K04733	Q8RWZ5	186	1.30E-12	G-type lectin S-receptor-like serine/threonine-protein kinase SD2-5 OS=Arabidopsis thaliana GN=SD25 PE=1 SV=1	--	--	--	--	--	--	--	--
Cluster-242496.77697	--	--	--	--	Q9LTV8	1340	2.50E-146	Pentatricopeptide repeat-containing protein At3g12770 OS=Arabidopsis thaliana GN=PCMP-H43 PE=2 SV=1	--	--	--	--	--	--	--	--
Cluster-242496.103107	--	--	--	--	Q9S814	777	1.60E-80	Ethylene-insensitive protein 2 OS=Arabidopsis thaliana GN=EIN2 PE=1 SV=1	PF01566//PF04666//PF03037	Natural resistance-associated macrophage protein//N-Acetylglucosaminyltransferase-IV (GnT-IV) conserved region//Kinetoplastid membrane protein 11	GO:0005975//GO:0008284//GO:0006952//GO:0006810	carbohydrate metabolic process//positive regulation of cell proliferation//defense response//transport	GO:0005215//GO:0016758	transporter activity//transferase activity, transferring hexosyl groups	GO:0016020	membrane
Cluster-242496.117599	--	--	--	--	--	--	--	--	--	--	--	--	--	--	--	--
Cluster-242496.91069	--	--	--	--	--	--	--	--	PF02166//PF01213	Androgen receptor//Adenylate cyclase associated (CAP) N terminal	GO:0006355//GO:0030521//GO:0007010//GO:0007165	regulation of transcription, DNA-templated//androgen receptor signaling pathway//cytoskeleton organization//signal transduction	GO:0003677//GO:0005496//GO:0004882//GO:0003779	DNA binding//steroid binding//androgen receptor activity//actin binding	GO:0005634	nucleus
Cluster-242496.118691	--	--	--	--	Q9SVP7	1744	7.90E-193	Pentatricopeptide repeat-containing protein At4g13650 OS=Arabidopsis thaliana GN=PCMP-H42 PE=2 SV=2	PF00075//PF03214	RNase H//Reversibly glycosylated polypeptide	GO:0030244//GO:0051252	cellulose biosynthetic process//regulation of RNA metabolic process	GO:0003676//GO:0016866//GO:0004523	nucleic acid binding//intramolecular transferase activity//RNA-DNA hybrid ribonuclease activity	--	--
Cluster-242496.83212	--	--	--	--	Q9M815	147	5.40E-08	Protein PLANT CADMIUM RESISTANCE 8 OS=Arabidopsis thaliana GN=PCR8 PE=1 SV=2	PF06732//PF02990	Pescadillo N-terminus//Endomembrane protein 70	GO:0042254	ribosome biogenesis	--	--	GO:0016021//GO:0005730	integral component of membrane//nucleolus
Cluster-242496.67159	--	--	--	--	Q6WUC2	142	8.00E-08	(R,S)-reticuline 7-O-methyltransferase OS=Papaver somniferum GN=PSOMT1 PE=1 SV=1	PF08100	Dimerisation domain	--	--	GO:0046983	protein dimerization activity	--	--
Cluster-242496.66913	--	--	--	--	--	--	--	--	--	--	--	--	--	--	--	--
Cluster-242496.70274	--	--	--	--	--	--	--	--	PF06635	Nodulation protein NolV	GO:0009877	nodulation	--	--	--	--
Cluster-242496.138898	--	--	--	--	Q40374	497	1.20E-48	Pathogenesis-related protein PR-1 OS=Medicago truncatula GN=PR-1 PE=2 SV=1	PF02894	Oxidoreductase family, C-terminal alpha/beta domain	GO:0055114//GO:0008152	oxidation-reduction process//metabolic process	GO:0016491	oxidoreductase activity	--	--
Cluster-242496.91392	--	--	--	--	--	--	--	--	PF00503	G-protein alpha subunit	GO:0007165//GO:0007186	signal transduction//G-protein coupled receptor signaling pathway	GO:0004871//GO:0003924//GO:0019001//GO:0031683	signal transducer activity//GTPase activity//guanyl nucleotide binding//G-protein beta/gamma-subunit complex binding	--	--
Cluster-242496.99720	--	--	--	--	--	--	--	--	--	--	--	--	--	--	--	--
Cluster-242496.102327	--	--	--	--	Q9SCV9	1128	2.20E-121	Beta-galactosidase 3 OS=Arabidopsis thaliana GN=BGAL3 PE=1 SV=1	PF02140//PF02837//PF07503//PF02449//PF02150	Galactose binding lectin domain//Glycosyl hydrolases family 2, sugar binding domain//HypF finger//Beta-galactosidase//RNA polymerases M/15 Kd subunit	GO:0006206//GO:0006012//GO:0006027//GO:0006144//GO:0006351//GO:0005975//GO:0046486//GO:0006687	pyrimidine nucleobase metabolic process//galactose metabolic process//glycosaminoglycan catabolic process//purine nucleobase metabolic process//transcription, DNA-templated//carbohydrate metabolic process//glycerolipid metabolic process//glycosphingolipid metabolic process	GO:0004553//GO:0004565//GO:0003677//GO:0003899//GO:0030246//GO:0008270	hydrolase activity, hydrolyzing O-glycosyl compounds//beta-galactosidase activity//DNA binding//DNA-directed RNA polymerase activity//carbohydrate binding//zinc ion binding	GO:0005730//GO:0009341	nucleolus//beta-galactosidase complex
Cluster-242496.129285	--	--	--	--	P0C7Q9	874	5.20E-92	Pentatricopeptide repeat-containing protein At1g22960, mitochondrial OS=Arabidopsis thaliana GN=At1g22960 PE=2 SV=1	PF17049	ATPase expression protein 1	GO:0006417	regulation of translation	GO:0045182	translation regulator activity	--	--
Cluster-242496.86844	--	--	--	--	--	--	--	--	PF00096	Zinc finger, C2H2 type	--	--	GO:0046872	metal ion binding	--	--
Cluster-242496.91305	--	--	--	--	Q9FII5	994	4.80E-106	Leucine-rich repeat receptor-like protein kinase TDR OS=Arabidopsis thaliana GN=TDR PE=1 SV=1	PF13855//PF00560	Leucine rich repeat//Leucine Rich Repeat	--	--	GO:0005515	protein binding	--	--
Cluster-242496.80559	--	--	--	--	Q6NLW5	171	1.20E-10	Protein XRI1 OS=Arabidopsis thaliana GN=XRI1 PE=1 SV=2	PF00418	Tau and MAP protein, tubulin-binding repeat	--	--	GO:0015631	tubulin binding	GO:0045298	tubulin complex
Cluster-242496.104746	--	--	--	--	Q9FG13	540	1.80E-53	Probable carboxylesterase 15 OS=Arabidopsis thaliana GN=CXE15 PE=2 SV=1	PF03137//PF12740//PF10503//PF07859	Organic Anion Transporter Polypeptide (OATP) family//Chlorophyllase enzyme//Esterase PHB depolymerase//alpha/beta hydrolase fold	GO:0015996//GO:0015994//GO:0006810//GO:0008152	chlorophyll catabolic process//chlorophyll metabolic process//transport//metabolic process	GO:0047746//GO:0016787//GO:0005215	chlorophyllase activity//hydrolase activity//transporter activity	GO:0016020//GO:0005576	membrane//extracellular region
Cluster-242496.78789	--	--	--	--	--	--	--	--	--	--	--	--	--	--	--	--
Cluster-242496.117078	--	--	--	--	D7SFH9	655	9.80E-67	Glycerophosphodiester phosphodiesterase protein kinase domain-containing GDPDL2 OS=Arabidopsis thaliana GN=GDPDL2 PE=1 SV=1	PF13947//PF07714//PF00069	Wall-associated receptor kinase galacturonan-binding//Protein tyrosine kinase//Protein kinase domain	GO:0006468	protein phosphorylation	GO:0005524//GO:0004672//GO:0030247	ATP binding//protein kinase activity//polysaccharide binding	--	--
Cluster-242496.80895	--	--	--	--	F4IPE3	803	6.20E-84	Protein SHOOT GRAVITROPISM 5 OS=Arabidopsis thaliana GN=SGR5 PE=1 SV=1	PF00096//PF13912//PF07975//PF03145//PF01155//PF13465	Zinc finger, C2H2 type//C2H2-type zinc finger//TFIIH C1-like domain//Seven in absentia protein family//Hydrogenase/urease nickel incorporation, metallochaperone, hypA//Zinc-finger double domain	GO:0006281//GO:0006464//GO:0006511//GO:0007275	DNA repair//cellular protein modification process//ubiquitin-dependent protein catabolic process//multicellular organismal development	GO:0016151//GO:0046872//GO:0008270	nickel cation binding//metal ion binding//zinc ion binding	GO:0005634	nucleus
Cluster-242496.125987	--	--	--	--	Q562D6	380	6.20E-35	Nef-associated protein 1 OS=Mus musculus GN=Nap1 PE=2 SV=2	--	--	--	--	--	--	--	--
Cluster-242496.79153	--	--	--	--	Q8DKS7	913	9.50E-97	UDP-N-acetylglucosamine 1-carboxyvinyltransferase OS=Thermosynechococcus elongatus (strain BP-1) GN=murA PE=3 SV=1	PF00275	EPSP synthase (3-phosphoshikimate 1-carboxyvinyltransferase)	--	--	GO:0016765	transferase activity, transferring alkyl or aryl (other than methyl) groups	--	--
Cluster-242496.75773	--	--	--	--	P19076	130	4.60E-06	2-hydroxymuconate semialdehyde hydrolase OS=Pseudomonas sp. (strain CF600) GN=dmpD PE=3 SV=1	PF06821//PF00975//PF07819	Serine hydrolase//Thioesterase domain//PGAP1-like protein	GO:0006505//GO:0006886//GO:0009058	GPI anchor metabolic process//intracellular protein transport//biosynthetic process	GO:0016787//GO:0016788	hydrolase activity//hydrolase activity, acting on ester bonds	--	--
Cluster-242496.81387	--	--	--	--	--	--	--	--	--	--	--	--	--	--	--	--
Cluster-242496.69397	--	--	--	--	--	--	--	--	--	--	--	--	--	--	--	--
Cluster-242496.110687	--	--	--	--	Q9SX98	1254	3.40E-136	Lysine histidine transporter-like 8 OS=Arabidopsis thaliana GN=AATL1 PE=1 SV=1	PF00628//PF04947	PHD-finger//Poxvirus Late Transcription Factor VLTF3 like	GO:0046782	regulation of viral transcription	GO:0005515	protein binding	--	--
Cluster-242496.89529	--	--	--	--	--	--	--	--	--	--	--	--	--	--	--	--
Cluster-242496.75224	--	--	--	--	--	--	--	--	--	--	--	--	--	--	--	--
Cluster-242496.107111	--	--	--	--	Q7Y211	280	7.10E-24	Pentatricopeptide repeat-containing protein At3g57430, chloroplastic OS=Arabidopsis thaliana GN=PCMP-H81 PE=2 SV=2	--	--	--	--	--	--	--	--
Cluster-242496.104217	K03283	HSPA1_8	heat shock 70kDa protein 1/8	http://www.genome.jp/dbget-bin/www_bget?ko:K03283	P27322	670	1.50E-68	Heat shock cognate 70 kDa protein 2 OS=Solanum lycopersicum GN=HSC-2 PE=2 SV=1	PF06723//PF00608	MreB/Mbl protein//Adenoviral fibre protein (repeat/shaft region)	GO:0000902//GO:0019062//GO:0009405//GO:0007155	cell morphogenesis//virion attachment to host cell//pathogenesis//cell adhesion	--	--	--	--
Cluster-242496.108436	--	--	--	--	--	--	--	--	--	--	--	--	--	--	--	--
Cluster-242496.82102	K10268	FBXL2_20	F-box and leucine-rich repeat protein 2/20	http://www.genome.jp/dbget-bin/www_bget?ko:K10268	Q8RWU5	1436	3.30E-157	F-box/LRR-repeat protein 3 OS=Arabidopsis thaliana GN=FBL3 PE=2 SV=1	PF13855//PF12937//PF13516	Leucine rich repeat//F-box-like//Leucine Rich repeat	--	--	GO:0005515	protein binding	--	--
Cluster-242496.104498	--	--	--	--	--	--	--	--	--	--	--	--	--	--	--	--
Cluster-242496.94047	K13998	DHFR-TS	dihydrofolate reductase / thymidylate synthase	http://www.genome.jp/dbget-bin/www_bget?ko:K13998	P45350	160	9.90E-10	Bifunctional dihydrofolate reductase-thymidylate synthase OS=Daucus carota PE=2 SV=1	PF00186//PF03554	Dihydrofolate reductase//UL73 viral envelope glycoprotein	GO:0006545//GO:0046656//GO:0006761//GO:0055114//GO:0009165	glycine biosynthetic process//folic acid biosynthetic process//dihydrofolate biosynthetic process//oxidation-reduction process//nucleotide biosynthetic process	GO:0004146	dihydrofolate reductase activity	GO:0019031	viral envelope
Cluster-242496.98261	K08874	TRRAP	transformation/transcription domain-associated protein	http://www.genome.jp/dbget-bin/www_bget?ko:K08874	P38811	847	6.70E-89	Transcription-associated protein 1 OS=Saccharomyces cerevisiae (strain ATCC 204508 / S288c) GN=TRA1 PE=1 SV=1	PF13414//PF02260//PF02259//PF00454	TPR repeat//FATC domain//FAT domain//Phosphatidylinositol 3- and 4-kinase	--	--	GO:0005515//GO:0016773	protein binding//phosphotransferase activity, alcohol group as acceptor	--	--
Cluster-242496.119209	--	--	--	--	Q9SDN0	302	5.20E-26	Chaperone protein dnaJ 20, chloroplastic OS=Arabidopsis thaliana GN=ATJ20 PE=1 SV=2	PF01321	Creatinase/Prolidase N-terminal domain	--	--	GO:0016787	hydrolase activity	--	--
Cluster-242496.78579	K15436	TRPO3, MTR10	transportin-3	http://www.genome.jp/dbget-bin/www_bget?ko:K15436	Q9Y5L0	228	2.20E-17	Transportin-3 OS=Homo sapiens GN=TNPO3 PE=1 SV=3	PF00984//PF01119	UDP-glucose/GDP-mannose dehydrogenase family, central domain//DNA mismatch repair protein, C-terminal domain	GO:0006298//GO:0055114	mismatch repair//oxidation-reduction process	GO:0030983//GO:0051287//GO:0016616//GO:0005524	mismatched DNA binding//NAD binding//oxidoreductase activity, acting on the CH-OH group of donors, NAD or NADP as acceptor//ATP binding	--	--
Cluster-242496.74400	K01583	E4.1.1.19	arginine decarboxylase	http://www.genome.jp/dbget-bin/www_bget?ko:K01583	Q8DHY6	1471	2.20E-161	Biosynthetic arginine decarboxylase OS=Thermosynechococcus elongatus (strain BP-1) GN=speA PE=3 SV=1	PF02784//PF00278//PF06466	Pyridoxal-dependent decarboxylase, pyridoxal binding domain//Pyridoxal-dependent decarboxylase, C-terminal sheet domain//PCAF (P300/CBP-associated factor) N-terminal domain	GO:0006355//GO:0042967	regulation of transcription, DNA-templated//acyl-carrier-protein biosynthetic process	GO:0003824//GO:0004402	catalytic activity//histone acetyltransferase activity	GO:0005634//GO:0000123	nucleus//histone acetyltransferase complex
Cluster-242496.82820	--	--	--	--	Q84MB2	134	3.90E-06	Protein TIFY 8 OS=Arabidopsis thaliana GN=TIFY8 PE=1 SV=1	PF00701	Dihydrodipicolinate synthetase family	GO:0008152	metabolic process	GO:0016829	lyase activity	--	--
Cluster-242496.101400	--	--	--	--	--	--	--	--	--	--	--	--	--	--	--	--
Cluster-242496.88776	K18584	ACTR3, ARP3	actin-related protein 3	http://www.genome.jp/dbget-bin/www_bget?ko:K18584	Q9SAF1	1355	5.50E-148	Actin-related protein 3 OS=Arabidopsis thaliana GN=ARP3 PE=1 SV=1	PF12856	Anaphase-promoting complex subunit 9	--	--	--	--	GO:0005680	anaphase-promoting complex
Cluster-242496.81440	--	--	--	--	Q8GYX9	293	1.10E-24	Protein WVD2-like 1 OS=Arabidopsis thaliana GN=WDL1 PE=1 SV=1	--	--	--	--	--	--	--	--
Cluster-242496.79296	--	--	--	--	Q66GI9	1346	5.80E-147	Probable anion transporter 4, chloroplastic OS=Arabidopsis thaliana GN=ANTR4 PE=2 SV=1	PF00083//PF07690	Sugar (and other) transporter//Major Facilitator Superfamily	GO:0055085	transmembrane transport	GO:0022857	transmembrane transporter activity	GO:0016021	integral component of membrane
Cluster-242496.91854	--	--	--	--	--	--	--	--	PF09297	NADH pyrophosphatase zinc ribbon domain	--	--	GO:0046872//GO:0016787	metal ion binding//hydrolase activity	--	--
Cluster-242496.84223	K03105	SRP19	signal recognition particle subunit SRP19	http://www.genome.jp/dbget-bin/www_bget?ko:K03105	Q943Z6	475	3.90E-46	Signal recognition particle 19 kDa protein OS=Arabidopsis thaliana GN=SRP19 PE=1 SV=1	PF01922	SRP19 protein	GO:0006614	SRP-dependent cotranslational protein targeting to membrane	GO:0008312	7S RNA binding	GO:0048500	signal recognition particle
Cluster-242496.107132	K15498	PPP6C	serine/threonine-protein phosphatase 6 catalytic subunit	http://www.genome.jp/dbget-bin/www_bget?ko:K15498	Q8LSN3	1567	2.50E-172	Phytochrome-associated serine/threonine-protein phosphatase OS=Pisum sativum GN=FYPP PE=1 SV=1	PF00149//PF00240//PF01043	Calcineurin-like phosphoesterase//Ubiquitin family//SecA preprotein cross-linking domain	GO:0017038	protein import	GO:0005515//GO:0016787	protein binding//hydrolase activity	GO:0016020	membrane
Cluster-242496.120296	--	--	--	--	Q8VWZ7	632	1.60E-64	Geraniol 8-hydroxylase OS=Catharanthus roseus GN=CYP76B6 PE=1 SV=1	PF00067//PF00714	Cytochrome P450//Interferon gamma	GO:0007165//GO:0055114//GO:0006955	signal transduction//oxidation-reduction process//immune response	GO:0016705//GO:0005133//GO:0005506//GO:0020037	oxidoreductase activity, acting on paired donors, with incorporation or reduction of molecular oxygen//interferon-gamma receptor binding//iron ion binding//heme binding	GO:0005576	extracellular region
Cluster-242496.115607	--	--	--	--	--	--	--	--	--	--	--	--	--	--	--	--
Cluster-242496.105221	--	--	--	--	Q9S7Y7	137	5.40E-07	Alpha-xylosidase 1 OS=Arabidopsis thaliana GN=XYL1 PE=1 SV=1	PF03832//PF06467	WSK motif//MYM-type Zinc finger with FCS sequence motif	GO:0006605//GO:0007165	protein targeting//signal transduction	GO:0008270	zinc ion binding	--	--
Cluster-242496.98002	--	--	--	--	--	--	--	--	PF00005//PF00004//PF00931//PF08515//PF05496//PF01517//PF01637//PF00158//PF03193//PF02444//PF00437	ABC transporter//ATPase family associated with various cellular activities (AAA)//NB-ARC domain//Transforming growth factor beta type I GS-motif//Holliday junction DNA helicase ruvB N-terminus//Hepatitis delta virus delta antigen//Archaeal ATPase//Sigma-54 interaction domain//Protein of unknown function, DUF258//Hepatitis E virus ORF-2 (Putative capsid protein)//Type II/IV secretion system protein	GO:0007178//GO:0006281//GO:0006310//GO:0006355//GO:0006810//GO:0006468//GO:0009069//GO:0016310	transmembrane receptor protein serine/threonine kinase signaling pathway//DNA repair//DNA recombination//regulation of transcription, DNA-templated//transport//protein phosphorylation//serine family amino acid metabolic process//phosphorylation	GO:0005525//GO:0016887//GO:0009378//GO:0004675//GO:0043531//GO:0003924//GO:0008134//GO:0005524//GO:0003723	GTP binding//ATPase activity//four-way junction helicase activity//transmembrane receptor protein serine/threonine kinase activity//ADP binding//GTPase activity//transcription factor binding//ATP binding//RNA binding	GO:0030430//GO:0005657//GO:0009379//GO:0042025//GO:0016020//GO:0005667	host cell cytoplasm//replication fork//Holliday junction helicase complex//host cell nucleus//membrane//transcription factor complex
Cluster-242496.63449	--	--	--	--	Q8VZE4	1049	2.60E-112	Pentatricopeptide repeat-containing protein At4g01570 OS=Arabidopsis thaliana GN=At4g01570 PE=2 SV=1	PF17049//PF13414	ATPase expression protein 1//TPR repeat	GO:0006417	regulation of translation	GO:0005515//GO:0045182	protein binding//translation regulator activity	--	--
Cluster-242496.93423	--	--	--	--	--	--	--	--	--	--	--	--	--	--	--	--
Cluster-242496.85250	K16675	ZDHHC9_14_18	palmitoyltransferase ZDHHC9/14/18	http://www.genome.jp/dbget-bin/www_bget?ko:K16675	Q0WQK2	954	1.40E-101	Probable protein S-acyltransferase 7 OS=Arabidopsis thaliana GN=PAT07 PE=1 SV=1	PF02891//PF01529	MIZ/SP-RING zinc finger//DHHC palmitoyltransferase	--	--	GO:0008270	zinc ion binding	--	--
Cluster-242496.95753	K10400	KIF15	kinesin family member 15	http://www.genome.jp/dbget-bin/www_bget?ko:K10400	Q8L7Y8	2455	3.00E-275	Kinesin-like protein KIN12B OS=Arabidopsis thaliana GN=KIN12B PE=1 SV=1	PF00225	Kinesin motor domain	GO:0007017//GO:0007018	microtubule-based process//microtubule-based movement	GO:0008017//GO:0003777//GO:0005524	microtubule binding//microtubule motor activity//ATP binding	GO:0005874//GO:0045298	microtubule//tubulin complex
Cluster-242496.54212	--	--	--	--	Q9CAJ9	224	6.10E-17	BTB/POZ domain-containing protein At1g63850 OS=Arabidopsis thaliana GN=At1g63850 PE=1 SV=1	--	--	--	--	--	--	--	--
Cluster-242496.78426	K07937	ARF1	ADP-ribosylation factor 1	http://www.genome.jp/dbget-bin/www_bget?ko:K07937	P51823	373	2.70E-34	ADP-ribosylation factor 2 OS=Oryza sativa subsp. japonica GN=ARF PE=2 SV=2	PF00025	ADP-ribosylation factor family	--	--	GO:0005525	GTP binding	--	--
Cluster-242496.116104	--	--	--	--	--	--	--	--	--	--	--	--	--	--	--	--
Cluster-242496.122063	--	--	--	--	Q7Z494	186	2.30E-12	Nephrocystin-3 OS=Homo sapiens GN=NPHP3 PE=1 SV=1	PF13374//PF00769//PF06305//PF13181//PF00515//PF13414//PF13176	Tetratricopeptide repeat//Ezrin/radixin/moesin family//Protein of unknown function (DUF1049)//Tetratricopeptide repeat//Tetratricopeptide repeat//TPR repeat//Tetratricopeptide repeat	--	--	GO:0005515//GO:0008092	protein binding//cytoskeletal protein binding	GO:0019898//GO:0005887//GO:0005737	extrinsic component of membrane//integral component of plasma membrane//cytoplasm
Cluster-242496.115794	--	--	--	--	--	--	--	--	--	--	--	--	--	--	--	--
Cluster-242496.96661	--	--	--	--	--	--	--	--	PF00257	Dehydrin	GO:0009415//GO:0006950	response to water//response to stress	--	--	--	--
Cluster-242496.112529	K10579	UBE2M, UBC12	ubiquitin-conjugating enzyme E2 M	http://www.genome.jp/dbget-bin/www_bget?ko:K10579	Q9ZU75	182	2.60E-12	Probable NEDD8-conjugating enzyme Ubc12-like OS=Arabidopsis thaliana GN=RCE2 PE=2 SV=1	--	--	--	--	--	--	--	--
Cluster-242496.111114	--	--	--	--	Q9ZUH1	1149	3.50E-124	BTB/POZ domain-containing protein At2g24240 OS=Arabidopsis thaliana GN=At2g24240 PE=2 SV=1	PF01213//PF02214	Adenylate cyclase associated (CAP) N terminal//BTB/POZ domain	GO:0007010//GO:0051260	cytoskeleton organization//protein homooligomerization	GO:0003779	actin binding	--	--
Cluster-242496.77224	K08737	MSH6	DNA mismatch repair protein MSH6	http://www.genome.jp/dbget-bin/www_bget?ko:K08737	O04716	2906	0.00E+00	DNA mismatch repair protein MSH6 OS=Arabidopsis thaliana GN=MSH6 PE=1 SV=2	PF05192//PF00488//PF05188//PF02201//PF05190//PF01624	MutS domain III//MutS domain V//MutS domain II//SWIB/MDM2 domain//MutS family domain IV//MutS domain I	GO:0006298	mismatch repair	GO:0030983//GO:0005515//GO:0005524	mismatched DNA binding//protein binding//ATP binding	--	--
Cluster-242496.109050	K15289	SLC35F5	solute carrier family 35, member F5	http://www.genome.jp/dbget-bin/www_bget?ko:K15289	Q03730	327	9.00E-29	Uncharacterized vacuolar membrane protein YML018C OS=Saccharomyces cerevisiae (strain ATCC 204508 / S288c) GN=YML018C PE=1 SV=1	PF00892//PF08449	EamA-like transporter family//UAA transporter family	GO:0055085	transmembrane transport	--	--	GO:0016020//GO:0016021	membrane//integral component of membrane
Cluster-242496.95716	K01354	ptrB	oligopeptidase B	http://www.genome.jp/dbget-bin/www_bget?ko:K01354	Q59536	1353	9.10E-148	Protease 2 OS=Moraxella lacunata GN=ptrB PE=3 SV=1	PF00326//PF02897//PF07859//PF02129	Prolyl oligopeptidase family//Prolyl oligopeptidase, N-terminal beta-propeller domain//alpha/beta hydrolase fold//X-Pro dipeptidyl-peptidase (S15 family)	GO:0006508//GO:0008152	proteolysis//metabolic process	GO:0008236//GO:0016787//GO:0004252//GO:0070008	serine-type peptidase activity//hydrolase activity//serine-type endopeptidase activity//serine-type exopeptidase activity	--	--
Cluster-242496.86855	--	--	--	--	O81767	258	5.00E-21	Pentatricopeptide repeat-containing protein At4g33990 OS=Arabidopsis thaliana GN=EMB2758 PE=3 SV=2	--	--	--	--	--	--	--	--
Cluster-242496.124338	K15121	SLC25A44	solute carrier family 25, member 44	http://www.genome.jp/dbget-bin/www_bget?ko:K15121	Q54VX4	292	8.20E-25	Mitochondrial substrate carrier family protein J OS=Dictyostelium discoideum GN=mcfJ PE=2 SV=1	PF02674	Colicin V production protein	GO:0009403	toxin biosynthetic process	--	--	GO:0016020	membrane
Cluster-242496.91009	--	--	--	--	--	--	--	--	--	--	--	--	--	--	--	--
Cluster-242496.59398	--	--	--	--	--	--	--	--	--	--	--	--	--	--	--	--
Cluster-242496.93138	K01285	PRCP	lysosomal Pro-X carboxypeptidase	http://www.genome.jp/dbget-bin/www_bget?ko:K01285	Q5RBU7	804	5.40E-84	Lysosomal Pro-X carboxypeptidase OS=Pongo abelii GN=PRCP PE=2 SV=1	PF05577//PF00326	Serine carboxypeptidase S28//Prolyl oligopeptidase family	GO:0006508	proteolysis	GO:0008236	serine-type peptidase activity	--	--
Cluster-242496.59179	--	--	--	--	--	--	--	--	--	--	--	--	--	--	--	--
Cluster-242496.98556	--	--	--	--	Q8LBV4	413	8.40E-39	Uncharacterized methyltransferase At1g78140, chloroplastic OS=Arabidopsis thaliana GN=At1g78140 PE=2 SV=1	PF05148//PF13912//PF01209//PF03141//PF08241	Hypothetical methyltransferase//C2H2-type zinc finger//ubiE/COQ5 methyltransferase family//Putative S-adenosyl-L-methionine-dependent methyltransferase//Methyltransferase domain	GO:0008152	metabolic process	GO:0046872//GO:0008168	metal ion binding//methyltransferase activity	--	--
Cluster-242496.81114	--	--	--	--	Q9LSZ0	738	1.20E-76	APO protein 4, mitochondrial OS=Arabidopsis thaliana GN=APO4 PE=2 SV=2	PF05634	APO RNA-binding	--	--	GO:0003723	RNA binding	--	--
Cluster-242496.108824	--	--	--	--	--	--	--	--	--	--	--	--	--	--	--	--
Cluster-242496.107656	--	--	--	--	--	--	--	--	--	--	--	--	--	--	--	--
Cluster-242496.10469	--	--	--	--	--	--	--	--	--	--	--	--	--	--	--	--
Cluster-242496.126243	--	--	--	--	Q9FN37	191	3.80E-13	Phytosulfokine receptor 2 OS=Arabidopsis thaliana GN=PSKR2 PE=2 SV=1	PF00067//PF07213	Cytochrome P450//DAP10 membrane protein	GO:0014068//GO:0007165//GO:0050776//GO:0055114	positive regulation of phosphatidylinositol 3-kinase signaling//signal transduction//regulation of immune response//oxidation-reduction process	GO:0005506//GO:0020037//GO:0043548//GO:0005102//GO:0016705	iron ion binding//heme binding//phosphatidylinositol 3-kinase binding//receptor binding//oxidoreductase activity, acting on paired donors, with incorporation or reduction of molecular oxygen	GO:0016020	membrane
Cluster-242496.77064	K01855	PUS3, DEG1	tRNA pseudouridine38/39 synthase	http://www.genome.jp/dbget-bin/www_bget?ko:K01855	Q3SX07	629	9.20E-64	tRNA pseudouridine(38/39) synthase OS=Bos taurus GN=PUS3 PE=2 SV=1	PF01416//PF01166	tRNA pseudouridine synthase//TSC-22/dip/bun family	GO:0001522//GO:0009451//GO:0006355	pseudouridine synthesis//RNA modification//regulation of transcription, DNA-templated	GO:0009982//GO:0003723//GO:0003700	pseudouridine synthase activity//RNA binding//transcription factor activity, sequence-specific DNA binding	GO:0005667	transcription factor complex
Cluster-242496.95799	--	--	--	--	--	--	--	--	PF16987	KIX domain	GO:0006355	regulation of transcription, DNA-templated	GO:0003712	transcription cofactor activity	GO:0005667	transcription factor complex
Cluster-242496.114930	K02717	psbP	photosystem II oxygen-evolving enhancer protein 2	http://www.genome.jp/dbget-bin/www_bget?ko:K02717	Q9SLQ8	262	7.00E-22	Oxygen-evolving enhancer protein 2, chloroplastic OS=Cucumis sativus GN=PSBP PE=2 SV=1	--	--	--	--	--	--	--	--
Cluster-242496.105570	--	--	--	--	P0C899	994	2.00E-106	Putative pentatricopeptide repeat-containing protein At3g49142 OS=Arabidopsis thaliana GN=PCMP-H77 PE=3 SV=1	--	--	--	--	--	--	--	--
Cluster-242496.87526	--	--	--	--	--	--	--	--	--	--	--	--	--	--	--	--
Cluster-242496.108329	--	--	--	--	Q9ZP59	694	4.20E-71	Tubby-like F-box protein 1 OS=Arabidopsis thaliana GN=TULP1 PE=2 SV=1	PF04104//PF00646//PF12937	Eukaryotic and archaeal DNA primase, large subunit//F-box domain//F-box-like	GO:0006269//GO:0006351	DNA replication, synthesis of RNA primer//transcription, DNA-templated	GO:0003896//GO:0005515	DNA primase activity//protein binding	GO:0005730//GO:0005657	nucleolus//replication fork
Cluster-242496.86371	--	--	--	--	--	--	--	--	--	--	--	--	--	--	--	--
Cluster-242496.94753	--	--	--	--	Q6ZCX3	1417	7.50E-155	Formin-like protein 6 OS=Oryza sativa subsp. japonica GN=FH6 PE=2 SV=2	--	--	--	--	--	--	--	--
Cluster-242496.118110	--	--	--	--	Q0WQW5	161	1.20E-09	Pentatricopeptide repeat-containing protein At1g59720, chloroplastic/mitochondrial OS=Arabidopsis thaliana GN=PCMP-H51 PE=2 SV=2	--	--	--	--	--	--	--	--
Cluster-242496.87131	--	--	--	--	--	--	--	--	PF01398//PF08369//PF09261	JAB1/Mov34/MPN/PAD-1 ubiquitin protease//Proto-chlorophyllide reductase 57 kD subunit//Alpha mannosidase, middle domain	GO:0005975//GO:0015995//GO:0015979//GO:0055114	carbohydrate metabolic process//chlorophyll biosynthetic process//photosynthesis//oxidation-reduction process	GO:0005515//GO:0004553//GO:0016491//GO:0008270	protein binding//hydrolase activity, hydrolyzing O-glycosyl compounds//oxidoreductase activity//zinc ion binding	--	--
Cluster-242496.107199	--	--	--	--	Q9LYD8	1514	2.20E-166	L-gulonolactone oxidase 3 OS=Arabidopsis thaliana GN=GULLO3 PE=1 SV=1	PF00026//PF04030//PF01565	Eukaryotic aspartyl protease//D-arabinono-1,4-lactone oxidase//FAD binding domain	GO:0006508//GO:0055114	proteolysis//oxidation-reduction process	GO:0003885//GO:0050660//GO:0016491//GO:0004190	D-arabinono-1,4-lactone oxidase activity//flavin adenine dinucleotide binding//oxidoreductase activity//aspartic-type endopeptidase activity	GO:0016020	membrane
Cluster-242496.127621	--	--	--	--	--	--	--	--	PF01424//PF06645	R3H domain//Microsomal signal peptidase 12 kDa subunit (SPC12)	GO:0006465	signal peptide processing	GO:0003676//GO:0008233	nucleic acid binding//peptidase activity	GO:0016021//GO:0005787	integral component of membrane//signal peptidase complex
Cluster-242496.110101	--	--	--	--	--	--	--	--	--	--	--	--	--	--	--	--
Cluster-242496.110865	--	--	--	--	Q40392	460	2.40E-44	TMV resistance protein N OS=Nicotiana glutinosa GN=N PE=1 SV=1	PF03205//PF02562//PF02367//PF01695//PF00931//PF01443//PF01582//PF01926//PF00005	Molybdopterin guanine dinucleotide synthesis protein B//PhoH-like protein//Threonylcarbamoyl adenosine biosynthesis protein TsaE//IstB-like ATP binding protein//NB-ARC domain//Viral (Superfamily 1) RNA helicase//TIR domain//50S ribosome-binding GTPase//ABC transporter	GO:0007165//GO:0002949//GO:0006777	signal transduction//tRNA threonylcarbamoyladenosine modification//Mo-molybdopterin cofactor biosynthetic process	GO:0005525//GO:0043531//GO:0016887//GO:0005524//GO:0005515	GTP binding//ADP binding//ATPase activity//ATP binding//protein binding	--	--
Cluster-242496.117511	K10400	KIF15	kinesin family member 15	http://www.genome.jp/dbget-bin/www_bget?ko:K10400	Q9LDN0	734	7.50E-76	Kinesin-like protein KIN12A OS=Arabidopsis thaliana GN=KIN12A PE=1 SV=1	PF11802//PF00225//PF03836//PF13851	Centromere-associated protein K//Kinesin motor domain//RasGAP C-terminus//Growth-arrest specific micro-tubule binding	GO:0007264//GO:0007017//GO:0007018//GO:0048870	small GTPase mediated signal transduction//microtubule-based process//microtubule-based movement//cell motility	GO:0003777//GO:0005524//GO:0008017//GO:0005096	microtubule motor activity//ATP binding//microtubule binding//GTPase activator activity	GO:0045298//GO:0005634//GO:0005874//GO:0031514	tubulin complex//nucleus//microtubule//motile cilium
Cluster-242496.79436	--	--	--	--	--	--	--	--	--	--	--	--	--	--	--	--
Cluster-242496.109751	K03549	kup	KUP system potassium uptake protein	http://www.genome.jp/dbget-bin/www_bget?ko:K03549	Q84YJ9	330	3.50E-29	Potassium transporter 26 OS=Oryza sativa subsp. japonica GN=HAK26 PE=2 SV=1	PF02705	K+ potassium transporter	GO:0006813//GO:0071805	potassium ion transport//potassium ion transmembrane transport	GO:0015079	potassium ion transmembrane transporter activity	GO:0016020	membrane
Cluster-242496.84995	--	--	--	--	Q8LG03	141	3.70E-07	F-box protein At4g00755 OS=Arabidopsis thaliana GN=At4g00755 PE=2 SV=1	PF00686	Starch binding domain	--	--	GO:2001070	starch binding	--	--
Cluster-242496.86464	K15711	SMARCA3, HLTF	SWI/SNF-related matrix-associated actin-dependent regulator of chromatin subfamily A3	http://www.genome.jp/dbget-bin/www_bget?ko:K15711	Q9FF61	574	2.10E-57	Putative SWI/SNF-related matrix-associated actin-dependent regulator of chromatin subfamily A member 3-like 1 OS=Arabidopsis thaliana GN=At5g05130 PE=2 SV=1	PF00176//PF08797//PF03710	SNF2 family N-terminal domain//HIRAN domain//Glutamate-ammonia ligase adenylyltransferase	--	--	GO:0003676//GO:0005524//GO:0016818//GO:0008882//GO:0008270	nucleic acid binding//ATP binding//hydrolase activity, acting on acid anhydrides, in phosphorus-containing anhydrides//[glutamate-ammonia-ligase] adenylyltransferase activity//zinc ion binding	--	--
Cluster-242496.104707	--	--	--	--	--	--	--	--	--	--	--	--	--	--	--	--
Cluster-242496.93292	--	--	--	--	Q94AW5	261	4.90E-21	Ethylene-responsive transcription factor ERF003 OS=Arabidopsis thaliana GN=ERF003 PE=2 SV=1	PF00225	Kinesin motor domain	GO:0007017//GO:0007018	microtubule-based process//microtubule-based movement	GO:0008017//GO:0003777//GO:0005524	microtubule binding//microtubule motor activity//ATP binding	GO:0005874//GO:0045298	microtubule//tubulin complex
Cluster-242496.106081	K13420	FLS2	LRR receptor-like serine/threonine-protein kinase FLS2	http://www.genome.jp/dbget-bin/www_bget?ko:K13420	Q9SD62	218	1.70E-16	Putative receptor-like protein kinase At3g47110 OS=Arabidopsis thaliana GN=At3g47110 PE=3 SV=1	PF00069//PF07714	Protein kinase domain//Protein tyrosine kinase	GO:0006468	protein phosphorylation	GO:0005524//GO:0004672	ATP binding//protein kinase activity	--	--
Cluster-242496.105775	--	--	--	--	Q9LVP0	1136	2.60E-122	Probable leucine-rich repeat receptor-like protein kinase At5g63930 OS=Arabidopsis thaliana GN=At5g63930 PE=2 SV=1	PF13855//PF08042//PF07714//PF01277//PF00069//PF00560	Leucine rich repeat//PqqA family//Protein tyrosine kinase//Oleosin//Protein kinase domain//Leucine Rich Repeat	GO:0006468//GO:0018189	protein phosphorylation//pyrroloquinoline quinone biosynthetic process	GO:0005515//GO:0004672//GO:0005524	protein binding//protein kinase activity//ATP binding	GO:0016021//GO:0012511	integral component of membrane//monolayer-surrounded lipid storage body
Cluster-242496.85966	--	--	--	--	Q9S9N9	432	5.40E-41	Cinnamoyl-CoA reductase 1 OS=Arabidopsis thaliana GN=CCR1 PE=1 SV=1	PF01073//PF01370	3-beta hydroxysteroid dehydrogenase/isomerase family//NAD dependent epimerase/dehydratase family	GO:0006694//GO:0008210//GO:0055114//GO:0008207//GO:0008209	steroid biosynthetic process//estrogen metabolic process//oxidation-reduction process//C21-steroid hormone metabolic process//androgen metabolic process	GO:0003824//GO:0003854//GO:0050662//GO:0016616	catalytic activity//3-beta-hydroxy-delta5-steroid dehydrogenase activity//coenzyme binding//oxidoreductase activity, acting on the CH-OH group of donors, NAD or NADP as acceptor	--	--
Cluster-242496.116779	--	--	--	--	--	--	--	--	--	--	--	--	--	--	--	--
Cluster-242496.97377	--	--	--	--	Q9LF10	865	5.80E-91	Chloroplastic group IIA intron splicing facilitator CRS1, chloroplastic OS=Arabidopsis thaliana GN=At5g16180 PE=3 SV=2	PF02098//PF01985	Tick histamine binding protein//CRS1 / YhbY (CRM) domain	GO:0030682	evasion or tolerance of host defense response	GO:0003723//GO:0043176	RNA binding//amine binding	--	--
Cluster-242496.77030	--	--	--	--	--	--	--	--	--	--	--	--	--	--	--	--
Cluster-242496.104358	--	--	--	--	Q9LVA0	290	2.20E-24	BAG family molecular chaperone regulator 7 OS=Arabidopsis thaliana GN=BAG7 PE=1 SV=1	PF00612//PF08675	IQ calmodulin-binding motif//RNA binding domain	GO:0006402//GO:0051252	mRNA catabolic process//regulation of RNA metabolic process	GO:0003723//GO:0005515//GO:0046872//GO:0004535	RNA binding//protein binding//metal ion binding//poly(A)-specific ribonuclease activity	GO:0005737//GO:0005634	cytoplasm//nucleus
Cluster-242496.100089	--	--	--	--	--	--	--	--	PF04140//PF01222//PF02088	Isoprenylcysteine carboxyl methyltransferase (ICMT) family//Ergosterol biosynthesis ERG4/ERG24 family//Ornatin	GO:0006481//GO:0007155//GO:0030193//GO:0006479	C-terminal protein methylation//cell adhesion//regulation of blood coagulation//protein methylation	GO:0004671	protein C-terminal S-isoprenylcysteine carboxyl O-methyltransferase activity	GO:0005576//GO:0016021//GO:0016020	extracellular region//integral component of membrane//membrane
Cluster-242496.80800	--	--	--	--	--	--	--	--	--	--	--	--	--	--	--	--
Cluster-242496.70545	--	--	--	--	Q689D6	303	3.70E-26	Protein ROOT PRIMORDIUM DEFECTIVE 1 OS=Arabidopsis thaliana GN=RPD1 PE=1 SV=1	--	--	--	--	--	--	--	--
Cluster-242496.98290	--	--	--	--	Q9H6S0	1561	1.40E-171	Probable ATP-dependent RNA helicase YTHDC2 OS=Homo sapiens GN=YTHDC2 PE=1 SV=2	PF00158//PF02562//PF00437//PF00005//PF04408//PF00270//PF03896//PF14532//PF01424	Sigma-54 interaction domain//PhoH-like protein//Type II/IV secretion system protein//ABC transporter//Helicase associated domain (HA2)//DEAD/DEAH box helicase//Translocon-associated protein (TRAP), alpha subunit//Sigma-54 interaction domain//R3H domain	GO:0006355//GO:0006810	regulation of transcription, DNA-templated//transport	GO:0008134//GO:0016887//GO:0004386//GO:0003676//GO:0005524	transcription factor binding//ATPase activity//helicase activity//nucleic acid binding//ATP binding	GO:0005789//GO:0005667	endoplasmic reticulum membrane//transcription factor complex
Cluster-242496.107436	--	--	--	--	F4I8B9	714	1.70E-73	Putative WEB family protein At1g65010, chloroplastic OS=Arabidopsis thaliana GN=At1g65010 PE=1 SV=1	PF02653	Branched-chain amino acid transport system / permease component	GO:0006810	transport	GO:0005215	transporter activity	GO:0016020	membrane
Cluster-242496.120601	--	--	--	--	--	--	--	--	PF03839//PF05933	Translocation protein Sec62//Fungal ATP synthase protein 8 (A6L)	GO:0015031//GO:0015992//GO:0015986	protein transport//proton transport//ATP synthesis coupled proton transport	GO:0015078//GO:0008565	hydrogen ion transmembrane transporter activity//protein transporter activity	GO:0000276//GO:0016021	mitochondrial proton-transporting ATP synthase complex, coupling factor F(o)//integral component of membrane
Cluster-242496.98192	--	--	--	--	Q9SAH3	737	5.80E-76	Putative receptor-like protein kinase At1g80870 OS=Arabidopsis thaliana GN=At1g80870 PE=3 SV=1	PF00069//PF07714	Protein kinase domain//Protein tyrosine kinase	GO:0006468	protein phosphorylation	GO:0005524//GO:0004672	ATP binding//protein kinase activity	--	--
Cluster-242496.61865	--	--	--	--	--	--	--	--	--	--	--	--	--	--	--	--
Cluster-242496.116799	--	--	--	--	P9WMV8	263	3.80E-21	Cholesterol oxidase OS=Mycobacterium tuberculosis (strain CDC 1551 / Oshkosh) GN=choD PE=3 SV=1	PF12831//PF05199//PF00732//PF02668//PF09026//PF07992//PF01134//PF00070//PF01494//PF01266	FAD dependent oxidoreductase//GMC oxidoreductase//GMC oxidoreductase//Taurine catabolism dioxygenase TauD, TfdA family//Centromere protein B dimerisation domain//Pyridine nucleotide-disulphide oxidoreductase//Glucose inhibited division protein A//Pyridine nucleotide-disulphide oxidoreductase//FAD binding domain//FAD dependent oxidoreductase	GO:0055114//GO:0008033//GO:0006355	oxidation-reduction process//tRNA processing//regulation of transcription, DNA-templated	GO:0050660//GO:0071949//GO:0016491//GO:0003682//GO:0016614//GO:0003677	flavin adenine dinucleotide binding//FAD binding//oxidoreductase activity//chromatin binding//oxidoreductase activity, acting on CH-OH group of donors//DNA binding	GO:0005634//GO:0000775//GO:0000785	nucleus//chromosome, centromeric region//chromatin
Cluster-242496.117504	--	--	--	--	--	--	--	--	--	--	--	--	--	--	--	--
Cluster-242496.104434	K01897	ACSL, fadD	long-chain acyl-CoA synthetase	http://www.genome.jp/dbget-bin/www_bget?ko:K01897	Q9T0A0	1469	6.50E-161	Long chain acyl-CoA synthetase 4 OS=Arabidopsis thaliana GN=LACS4 PE=2 SV=1	PF00501	AMP-binding enzyme	GO:0008152	metabolic process	GO:0003824	catalytic activity	--	--
Cluster-242496.104737	--	--	--	--	Q9FFZ1	157	5.30E-09	Pheophytinase, chloroplastic OS=Arabidopsis thaliana GN=PPH PE=1 SV=1	PF01764//PF01265//PF03283	Lipase (class 3)//Cytochrome c/c1 heme lyase//Pectinacetylesterase	GO:0015994//GO:0006629	chlorophyll metabolic process//lipid metabolic process	GO:0004408//GO:0016787	holocytochrome-c synthase activity//hydrolase activity	GO:0005739	mitochondrion
Cluster-242496.109416	--	--	--	--	Q9SLF3	2115	8.90E-236	Translocase of chloroplast 132, chloroplastic OS=Arabidopsis thaliana GN=TOC132 PE=1 SV=1	PF00005//PF01926//PF00004//PF02421//PF04548//PF03193//PF00437	ABC transporter//50S ribosome-binding GTPase//ATPase family associated with various cellular activities (AAA)//Ferrous iron transport protein B//AIG1 family//Protein of unknown function, DUF258//Type II/IV secretion system protein	GO:0015684//GO:0006810	ferrous iron transport//transport	GO:0016887//GO:0003924//GO:0005525//GO:0005524//GO:0015093	ATPase activity//GTPase activity//GTP binding//ATP binding//ferrous iron transmembrane transporter activity	GO:0016021	integral component of membrane
Cluster-242496.107089	K15363	FAN1, MTMR15	fanconi-associated nuclease 1	http://www.genome.jp/dbget-bin/www_bget?ko:K15363	Q5SNL7	1298	3.50E-141	Fanconi-associated nuclease 1 homolog OS=Oryza sativa subsp. japonica GN=Os06g0171800 PE=3 SV=1	PF08797//PF08774	HIRAN domain//VRR-NUC domain	--	--	GO:0003676//GO:0016818//GO:0016788//GO:0008270	nucleic acid binding//hydrolase activity, acting on acid anhydrides, in phosphorus-containing anhydrides//hydrolase activity, acting on ester bonds//zinc ion binding	--	--
Cluster-242496.93900	K10532	HGSNAT	heparan-alpha-glucosaminide N-acetyltransferase	http://www.genome.jp/dbget-bin/www_bget?ko:K10532	Q3UDW8	312	4.60E-27	Heparan-alpha-glucosaminide N-acetyltransferase OS=Mus musculus GN=Hgsnat PE=1 SV=2	--	--	--	--	--	--	--	--
Cluster-242496.94974	--	--	--	--	Q9ZPS9	3172	0.00E+00	Serine/threonine-protein kinase BRI1-like 2 OS=Arabidopsis thaliana GN=BRL2 PE=1 SV=1	PF00711//PF13855//PF00069//PF06072//PF07714//PF00560	Beta defensin//Leucine rich repeat//Protein kinase domain//Alphaherpesvirus tegument protein US9//Protein tyrosine kinase//Leucine Rich Repeat	GO:0006468//GO:0006952	protein phosphorylation//defense response	GO:0005515//GO:0004672//GO:0005524	protein binding//protein kinase activity//ATP binding	GO:0005576//GO:0019033	extracellular region//viral tegument
Cluster-242496.73722	K03129	TAF4	transcription initiation factor TFIID subunit 4	http://www.genome.jp/dbget-bin/www_bget?ko:K03129	F4K4L7	534	1.00E-52	Transcription initiation factor TFIID subunit 4b OS=Arabidopsis thaliana GN=TAF4B PE=1 SV=1	PF05236	Transcription initiation factor TFIID component TAF4 family	GO:0006352	DNA-templated transcription, initiation	--	--	GO:0005669	transcription factor TFIID complex
Cluster-242496.115348	--	--	--	--	Q8RWR1	189	9.40E-13	Putative lysine-specific demethylase JMJD5 OS=Arabidopsis thaliana GN=JMJD5 PE=2 SV=1	--	--	--	--	--	--	--	--
Cluster-242496.102962	K09533	DNAJC13	DnaJ homolog subfamily C member 13	http://www.genome.jp/dbget-bin/www_bget?ko:K09533	F4IVL6	6173	0.00E+00	DnaJ homolog subfamily C GRV2 OS=Arabidopsis thaliana GN=GRV2 PE=1 SV=1	PF02145	Rap/ran-GAP	GO:0051056	regulation of small GTPase mediated signal transduction	GO:0005096	GTPase activator activity	--	--
Cluster-242496.109892	--	--	--	--	--	--	--	--	PF01304//PF02046	Gas vesicles protein GVPc repeated domain//Cytochrome c oxidase subunit VIa	GO:0015992//GO:0006123//GO:0031412	proton transport//mitochondrial electron transport, cytochrome c to oxygen//gas vesicle organization	GO:0004129	cytochrome-c oxidase activity	GO:0005743//GO:0031411//GO:0045277//GO:0005751	mitochondrial inner membrane//gas vesicle//respiratory chain complex IV//mitochondrial respiratory chain complex IV
Cluster-242496.114351	K02541	MCM3	DNA replication licensing factor MCM3	http://www.genome.jp/dbget-bin/www_bget?ko:K02541	Q9SX03	2552	7.40E-287	DNA replication licensing factor MCM3 homolog 3 OS=Zea mays GN=ROA3 PE=2 SV=1	PF04889//PF07728//PF00158//PF00493//PF07726	Cwf15/Cwc15 cell cycle control protein//AAA domain (dynein-related subfamily)//Sigma-54 interaction domain//MCM2/3/5 family//ATPase family associated with various cellular activities (AAA)	GO:0006355//GO:0000398//GO:0006260	regulation of transcription, DNA-templated//mRNA splicing, via spliceosome//DNA replication	GO:0016887//GO:0008134//GO:0003677//GO:0005524	ATPase activity//transcription factor binding//DNA binding//ATP binding	GO:0005667//GO:0005681	transcription factor complex//spliceosomal complex
Cluster-242496.89332	--	--	--	--	--	--	--	--	--	--	--	--	--	--	--	--
Cluster-242496.35784	--	--	--	--	--	--	--	--	--	--	--	--	--	--	--	--
Cluster-242496.87295	--	--	--	--	--	--	--	--	--	--	--	--	--	--	--	--
Cluster-242496.105567	--	--	--	--	Q9M9V8	472	1.80E-45	Calcium-dependent protein kinase 10 OS=Arabidopsis thaliana GN=CPK10 PE=1 SV=1	PF06293//PF02174//PF05393//PF00069//PF07714	Lipopolysaccharide kinase (Kdo/WaaP) family//PTB domain (IRS-1 type)//Human adenovirus early E3A glycoprotein//Protein kinase domain//Protein tyrosine kinase	GO:0007165//GO:0006468	signal transduction//protein phosphorylation	GO:0005524//GO:0016773//GO:0004672//GO:0005158	ATP binding//phosphotransferase activity, alcohol group as acceptor//protein kinase activity//insulin receptor binding	GO:0016020//GO:0005899//GO:0016021	membrane//insulin receptor complex//integral component of membrane
Cluster-242496.85298	K04713	SUR2	sphinganine C4-monooxygenase	http://www.genome.jp/dbget-bin/www_bget?ko:K04713	Q8VYI1	357	1.40E-32	Sphinganine C(4)-monooxygenase 1 OS=Arabidopsis thaliana GN=SBH1 PE=1 SV=1	PF04265//PF04116	Thiamin pyrophosphokinase, vitamin B1 binding domain//Fatty acid hydroxylase superfamily	GO:0009229//GO:0055114//GO:0006633	thiamine diphosphate biosynthetic process//oxidation-reduction process//fatty acid biosynthetic process	GO:0016491//GO:0005506//GO:0030975	oxidoreductase activity//iron ion binding//thiamine binding	--	--
Cluster-242496.118388	--	--	--	--	P14381	205	1.70E-14	Transposon TX1 uncharacterized 149 kDa protein OS=Xenopus laevis PE=3 SV=1	PF01165	Ribosomal protein S21	GO:0042254//GO:0006412	ribosome biogenesis//translation	GO:0003735	structural constituent of ribosome	GO:0005840	ribosome
Cluster-242496.107897	--	--	--	--	Q0IWF3	134	1.50E-06	Aquaporin NIP3-1 OS=Oryza sativa subsp. japonica GN=NIP3-1 PE=2 SV=2	PF12464	Maltose acetyltransferase	GO:0042967	acyl-carrier-protein biosynthetic process	GO:0016407	acetyltransferase activity	--	--
Cluster-242496.83612	--	--	--	--	Q9ZQR5	1326	1.60E-144	Protein trichome birefringence-like 13 OS=Arabidopsis thaliana GN=TBL13 PE=2 SV=1	PF04690	YABBY protein	GO:0007275	multicellular organismal development	--	--	--	--
Cluster-242496.59692	--	--	--	--	Q6DR24	156	5.50E-09	Uncharacterized protein At3g17950 OS=Arabidopsis thaliana GN=Y-3 PE=1 SV=1	PF12297	Ellis van Creveld protein 2 like protein	GO:0007224	smoothened signaling pathway	--	--	--	--
Cluster-242496.110022	--	--	--	--	O15050	592	5.80E-59	TPR and ankyrin repeat-containing protein 1 OS=Homo sapiens GN=TRANK1 PE=2 SV=4	PF13361//PF07652//PF00004//PF00580//PF01443//PF05970//PF04851//PF00515//PF13414//PF00437//PF07827//PF07728	UvrD-like helicase C-terminal domain//Flavivirus DEAD domain//ATPase family associated with various cellular activities (AAA)//UvrD/REP helicase N-terminal domain//Viral (Superfamily 1) RNA helicase//PIF1-like helicase//Type III restriction enzyme, res subunit//Tetratricopeptide repeat//TPR repeat//Type II/IV secretion system protein//KNTase C-terminal domain//AAA domain (dynein-related subfamily)	GO:0000723//GO:0006810//GO:0046677//GO:0019079//GO:0006281	telomere maintenance//transport//response to antibiotic//viral genome replication//DNA repair	GO:0008026//GO:0005515//GO:0005524//GO:0003677//GO:0016787//GO:0003678//GO:0016779//GO:0016887	ATP-dependent helicase activity//protein binding//ATP binding//DNA binding//hydrolase activity//DNA helicase activity//nucleotidyltransferase activity//ATPase activity	GO:0005657	replication fork
Cluster-242496.51051	--	--	--	--	--	--	--	--	--	--	--	--	--	--	--	--
Cluster-242496.100182	--	--	--	--	Q67XL4	476	4.40E-46	Uncharacterized CRM domain-containing protein At3g25440, chloroplastic OS=Arabidopsis thaliana GN=At3g25440 PE=2 SV=1	PF01985	CRS1 / YhbY (CRM) domain	--	--	GO:0003723	RNA binding	--	--
Cluster-242496.120378	--	--	--	--	Q03091	284	7.40E-24	Extracellular ribonuclease OS=Bacillus amyloliquefaciens GN=bsn PE=1 SV=1	PF08328//PF04231	Adenylosuccinate lyase C-terminal//Endonuclease I	GO:0006188//GO:0006144//GO:0006522//GO:0009152//GO:0006531	IMP biosynthetic process//purine nucleobase metabolic process//alanine metabolic process//purine ribonucleotide biosynthetic process//aspartate metabolic process	GO:0004518//GO:0004018	nuclease activity//N6-(1,2-dicarboxyethyl)AMP AMP-lyase (fumarate-forming) activity	--	--
Cluster-242496.83696	--	--	--	--	--	--	--	--	PF07578	Lipid A Biosynthesis N-terminal domain	GO:0009245	lipid A biosynthetic process	GO:0008915	lipid-A-disaccharide synthase activity	--	--
Cluster-242496.108845	--	--	--	--	--	--	--	--	PF05324	Sperm antigen HE2	--	--	--	--	GO:0005576	extracellular region
Cluster-242496.81962	K00924	E2.7.1.-	--	http://www.genome.jp/dbget-bin/www_bget?ko:K00924	Q9SGP2	1685	4.70E-186	Receptor-like protein kinase HSL1 OS=Arabidopsis thaliana GN=HSL1 PE=2 SV=1	PF07714//PF00069//PF00560//PF13855	Protein tyrosine kinase//Protein kinase domain//Leucine Rich Repeat//Leucine rich repeat	GO:0006468	protein phosphorylation	GO:0005524//GO:0004672//GO:0005515	ATP binding//protein kinase activity//protein binding	--	--
Cluster-242496.85724	--	--	--	--	Q9CAR3	834	2.00E-87	SNF1-related protein kinase regulatory subunit gamma-1-like OS=Arabidopsis thaliana GN=CBSCBS2 PE=1 SV=1	--	--	--	--	--	--	--	--
Cluster-242496.109120	K00419	QCR9, UCRC	ubiquinol-cytochrome c reductase subunit 9	http://www.genome.jp/dbget-bin/www_bget?ko:K00419	P46270	240	7.50E-19	Cytochrome b-c1 complex subunit 9 OS=Solanum tuberosum PE=1 SV=1	PF05365	Ubiquinol-cytochrome C reductase, UQCRX/QCR9 like	GO:0006122	mitochondrial electron transport, ubiquinol to cytochrome c	--	--	GO:0005750//GO:0005743	mitochondrial respiratory chain complex III//mitochondrial inner membrane
Cluster-242496.108897	--	--	--	--	Q9LQ54	136	2.10E-06	Probable disease resistance protein At1g59620 OS=Arabidopsis thaliana GN=At1g59620 PE=2 SV=3	PF00931//PF07728//PF07297//PF01335//PF01637//PF00004	NB-ARC domain//AAA domain (dynein-related subfamily)//Dolichol phosphate-mannose biosynthesis regulatory protein (DPM2)//Death effector domain//Archaeal ATPase//ATPase family associated with various cellular activities (AAA)	GO:0009059//GO:0042981	macromolecule biosynthetic process//regulation of apoptotic process	GO:0043531//GO:0016887//GO:0005524//GO:0005515	ADP binding//ATPase activity//ATP binding//protein binding	GO:0030176	integral component of endoplasmic reticulum membrane
Cluster-242496.102388	--	--	--	--	Q40392	766	2.20E-79	TMV resistance protein N OS=Nicotiana glutinosa GN=N PE=1 SV=1	PF13855//PF06988//PF13676//PF00931//PF00005//PF01637//PF01582	Leucine rich repeat//NifT/FixU protein//TIR domain//NB-ARC domain//ABC transporter//Archaeal ATPase//TIR domain	GO:0009399//GO:0007165	nitrogen fixation//signal transduction	GO:0043531//GO:0016887//GO:0005524//GO:0005515	ADP binding//ATPase activity//ATP binding//protein binding	--	--
Cluster-242496.77081	K00083	E1.1.1.195	cinnamyl-alcohol dehydrogenase	http://www.genome.jp/dbget-bin/www_bget?ko:K00083	O82515	273	1.60E-22	Probable mannitol dehydrogenase OS=Medicago sativa GN=CAD1 PE=1 SV=1	PF02826//PF00107//PF04434	D-isomer specific 2-hydroxyacid dehydrogenase, NAD binding domain//Zinc-binding dehydrogenase//SWIM zinc finger	GO:0055114	oxidation-reduction process	GO:0051287//GO:0008270	NAD binding//zinc ion binding	--	--
Cluster-242496.87436	--	--	--	--	P25698	134	3.50E-07	Elongation factor 1-alpha OS=Glycine max GN=TEFS1 PE=3 SV=2	--	--	--	--	--	--	--	--
Cluster-242496.91927	K09561	STUB1, CHIP	STIP1 homology and U-box containing protein 1	http://www.genome.jp/dbget-bin/www_bget?ko:K09561	Q9SRS9	257	2.10E-20	E3 ubiquitin-protein ligase CHIP OS=Arabidopsis thaliana GN=CHIP PE=1 SV=1	PF06416//PF13414//PF02883//PF13181//PF00515//PF11789//PF02687//PF13371//PF13374//PF13176//PF13174//PF04564//PF01649	Protein of unknown function (DUF1076)//TPR repeat//Adaptin C-terminal domain//Tetratricopeptide repeat//Tetratricopeptide repeat//Zinc-finger of the MIZ type in Nse subunit//FtsX-like permease family//Tetratricopeptide repeat//Tetratricopeptide repeat//Tetratricopeptide repeat//Tetratricopeptide repeat//U-box domain//Ribosomal protein S20	GO:0006412//GO:0072519//GO:0016567//GO:0016192//GO:0042254//GO:0006886	translation//parasitism//protein ubiquitination//vesicle-mediated transport//ribosome biogenesis//intracellular protein transport	GO:0004842//GO:0005515//GO:0003723//GO:0003735//GO:0008270	ubiquitin-protein transferase activity//protein binding//RNA binding//structural constituent of ribosome//zinc ion binding	GO:0016020//GO:0030131//GO:0005840//GO:0005622	membrane//clathrin adaptor complex//ribosome//intracellular
Cluster-242496.86316	--	--	--	--	--	--	--	--	--	--	--	--	--	--	--	--
Cluster-242496.97783	--	--	--	--	P73625	672	9.70E-69	Endonuclease MutS2 OS=Synechocystis sp. (strain PCC 6803 / Kazusa) GN=mutS2 PE=3 SV=1	PF08053//PF06839//PF00488	Tryptophanase operon leader peptide//GRF zinc finger//MutS domain V	GO:0006298//GO:0031554//GO:0031556	mismatch repair//regulation of DNA-templated transcription, termination//transcriptional attenuation by ribosome	GO:0030983//GO:0005524//GO:0008270	mismatched DNA binding//ATP binding//zinc ion binding	--	--
Cluster-242496.94629	--	--	--	--	--	--	--	--	--	--	--	--	--	--	--	--
Cluster-242496.95685	K03514	PAPD5_7, TRF4	non-canonical poly(A) RNA polymerase PAPD5/7	http://www.genome.jp/dbget-bin/www_bget?ko:K03514	Q8NDF8	566	1.70E-56	Non-canonical poly(A) RNA polymerase PAPD5 OS=Homo sapiens GN=PAPD5 PE=1 SV=2	PF01909	Nucleotidyltransferase domain	--	--	GO:0016779	nucleotidyltransferase activity	--	--
Cluster-242496.83679	--	--	--	--	--	--	--	--	--	--	--	--	--	--	--	--
Cluster-242496.116898	--	--	--	--	--	--	--	--	PF06941//PF02079	5' nucleotidase, deoxy (Pyrimidine), cytosolic type C protein (NT5C)//Nuclear transition protein 1	GO:0009264//GO:0007283	deoxyribonucleotide catabolic process//spermatogenesis	GO:0008253//GO:0003677	5'-nucleotidase activity//DNA binding	GO:0000786//GO:0005634	nucleosome//nucleus
Cluster-242496.128873	--	--	--	--	--	--	--	--	PF01250	Ribosomal protein S6	GO:0042254//GO:0006412	ribosome biogenesis//translation	GO:0003735//GO:0019843	structural constituent of ribosome//rRNA binding	GO:0005840	ribosome
Cluster-242496.103575	--	--	--	--	--	--	--	--	PF03626	Prokaryotic Cytochrome C oxidase subunit IV	--	--	--	--	GO:0016021	integral component of membrane
Cluster-242496.83060	K10406	KIFC2_3	kinesin family member C2/C3	http://www.genome.jp/dbget-bin/www_bget?ko:K10406	Q8W1Y3	300	9.10E-26	Kinesin KP1 OS=Arabidopsis thaliana GN=KP1 PE=1 SV=2	PF00225	Kinesin motor domain	GO:0007017//GO:0007018	microtubule-based process//microtubule-based movement	GO:0008017//GO:0003777//GO:0005524	microtubule binding//microtubule motor activity//ATP binding	GO:0005874//GO:0045298	microtubule//tubulin complex
Cluster-242496.69003	--	--	--	--	Q9LFV5	1682	7.80E-186	F-box/kelch-repeat protein At5g15710 OS=Arabidopsis thaliana GN=At5g15710 PE=2 SV=1	PF01344//PF00646//PF01621//PF12937	Kelch motif//F-box domain//Cell fusion glycoprotein K//F-box-like	--	--	GO:0005515	protein binding	GO:0016020	membrane
Cluster-242496.95885	--	--	--	--	--	--	--	--	PF05191//PF07649//PF00643	Adenylate kinase, active site lid//C1-like domain//B-box zinc finger	GO:0046034//GO:0055114//GO:0006144	ATP metabolic process//oxidation-reduction process//purine nucleobase metabolic process	GO:0004017//GO:0008270//GO:0047134	adenylate kinase activity//zinc ion binding//protein-disulfide reductase activity	GO:0005622	intracellular
Cluster-242496.104220	--	--	--	--	--	--	--	--	PF08711	TFIIS helical bundle-like domain	GO:0006351	transcription, DNA-templated	GO:0003677	DNA binding	GO:0005634	nucleus
Cluster-242496.89724	--	--	--	--	--	--	--	--	PF12906	RING-variant domain	--	--	GO:0008270	zinc ion binding	--	--
Cluster-242496.107645	--	--	--	--	Q6ZHJ5	1493	5.80E-164	Pentatricopeptide repeat-containing protein OTP51, chloroplastic OS=Oryza sativa subsp. japonica GN=OTP51 PE=3 SV=1	PF03161	LAGLIDADG DNA endonuclease family	--	--	GO:0004519	endonuclease activity	--	--
Cluster-242496.109645	K18998	CPL1_2	RNA polymerase II C-terminal domain phosphatase-like 1/2	http://www.genome.jp/dbget-bin/www_bget?ko:K18998	Q5YDB6	1516	1.80E-166	RNA polymerase II C-terminal domain phosphatase-like 1 OS=Arabidopsis thaliana GN=CPL1 PE=1 SV=1	--	--	--	--	--	--	--	--
Cluster-242496.74074	--	--	--	--	--	--	--	--	PF06337//PF00168//PF07684	DUSP domain//C2 domain//NOTCH protein	GO:0007219//GO:0030154//GO:0006508//GO:0016579//GO:0007275	Notch signaling pathway//cell differentiation//proteolysis//protein deubiquitination//multicellular organismal development	GO:0005515//GO:0004843	protein binding//ubiquitin-specific protease activity	GO:0016021	integral component of membrane
Cluster-242496.104821	--	--	--	--	Q9LXA5	1093	2.40E-117	L-type lectin-domain containing receptor kinase IX.1 OS=Arabidopsis thaliana GN=LECRK91 PE=2 SV=1	PF00139//PF03388//PF00069//PF07714	Legume lectin domain//Legume-like lectin family//Protein kinase domain//Protein tyrosine kinase	GO:0006468	protein phosphorylation	GO:0004672//GO:0005524//GO:0030246	protein kinase activity//ATP binding//carbohydrate binding	GO:0016020	membrane
Cluster-242496.118841	--	--	--	--	P0C899	976	5.20E-104	Putative pentatricopeptide repeat-containing protein At3g49142 OS=Arabidopsis thaliana GN=PCMP-H77 PE=3 SV=1	--	--	--	--	--	--	--	--
Cluster-242496.126572	--	--	--	--	Q8LPS6	758	1.20E-78	Pentatricopeptide repeat-containing protein At1g02150 OS=Arabidopsis thaliana GN=At1g02150 PE=2 SV=2	PF17097//PF13181//PF00637	Spindle pole body component//Tetratricopeptide repeat//Region in Clathrin and VPS	GO:0016192//GO:0006886	vesicle-mediated transport//intracellular protein transport	GO:0005515	protein binding	GO:0000775	chromosome, centromeric region
Cluster-242496.122718	--	--	--	--	--	--	--	--	PF13947//PF09268	Wall-associated receptor kinase galacturonan-binding//Clathrin, heavy-chain linker	GO:0016192//GO:0006886	vesicle-mediated transport//intracellular protein transport	GO:0005198//GO:0030247	structural molecule activity//polysaccharide binding	GO:0030132//GO:0030130	clathrin coat of coated pit//clathrin coat of trans-Golgi network vesicle
Cluster-242496.79517	--	--	--	--	Q9LD83	241	6.00E-19	Guard cell S-type anion channel SLAC1 OS=Arabidopsis thaliana GN=SLAC1 PE=1 SV=1	--	--	--	--	--	--	--	--
Cluster-242496.114750	--	--	--	--	C0LGS2	424	2.40E-40	Probable LRR receptor-like serine/threonine-protein kinase At4g36180 OS=Arabidopsis thaliana GN=At4g36180 PE=2 SV=1	PF00560//PF13855	Leucine Rich Repeat//Leucine rich repeat	--	--	GO:0005515	protein binding	--	--
Cluster-242496.93163	--	--	--	--	--	--	--	--	--	--	--	--	--	--	--	--
Cluster-242496.87110	--	--	--	--	Q94JX6	1141	3.30E-123	Pentatricopeptide repeat-containing protein At5g18390, mitochondrial OS=Arabidopsis thaliana GN=At5g18390 PE=2 SV=2	PF08785//PF17049//PF01335	Ku C terminal domain like//ATPase expression protein 1//Death effector domain	GO:0042981//GO:0006417	regulation of apoptotic process//regulation of translation	GO:0005515//GO:0045182//GO:0016817	protein binding//translation regulator activity//hydrolase activity, acting on acid anhydrides	--	--
Cluster-242496.73323	--	--	--	--	Q8GYX9	275	1.20E-22	Protein WVD2-like 1 OS=Arabidopsis thaliana GN=WDL1 PE=1 SV=1	--	--	--	--	--	--	--	--
Cluster-242496.82965	--	--	--	--	--	--	--	--	PF02926	THUMP domain	--	--	GO:0003723	RNA binding	--	--
Cluster-242496.113906	--	--	--	--	Q9SYQ0	325	2.80E-28	Increased DNA methylation 3 OS=Arabidopsis thaliana GN=IDM3 PE=1 SV=1	PF05309//PF02053	TraE protein//Gene 66 (IR5) protein	GO:0000746	conjugation	GO:0008270	zinc ion binding	--	--
Cluster-242496.109159	K05542	DUS1	tRNA-dihydrouridine synthase 1	http://www.genome.jp/dbget-bin/www_bget?ko:K05542	Q6P1R4	670	1.60E-68	tRNA-dihydrouridine(16/17) synthase [NAD(P)(+)]-like OS=Homo sapiens GN=DUS1L PE=1 SV=1	PF01680//PF00977//PF03060//PF01207//PF04309	SOR/SNZ family//Histidine biosynthesis protein//Nitronate monooxygenase//Dihydrouridine synthase (Dus)//Glycerol-3-phosphate responsive antiterminator	GO:0042823//GO:0006355//GO:0009607//GO:0055114//GO:0006807//GO:0042819//GO:0008033//GO:0000105	pyridoxal phosphate biosynthetic process//regulation of transcription, DNA-templated//response to biotic stimulus//oxidation-reduction process//nitrogen compound metabolic process//vitamin B6 biosynthetic process//tRNA processing//histidine biosynthetic process	GO:0018580//GO:0050660//GO:0017150	nitronate monooxygenase activity//flavin adenine dinucleotide binding//tRNA dihydrouridine synthase activity	--	--
Cluster-242496.90145	K14291	PHAX	phosphorylated adapter RNA export protein	http://www.genome.jp/dbget-bin/www_bget?ko:K14291	--	--	--	--	--	--	--	--	--	--	--	--
Cluster-242496.117203	--	--	--	--	--	--	--	--	--	--	--	--	--	--	--	--
Cluster-242496.100374	--	--	--	--	--	--	--	--	--	--	--	--	--	--	--	--
Cluster-242496.91513	K14555	UTP13, TBL3	U3 small nucleolar RNA-associated protein 13	http://www.genome.jp/dbget-bin/www_bget?ko:K14555	Q12788	330	3.90E-29	Transducin beta-like protein 3 OS=Homo sapiens GN=TBL3 PE=1 SV=2	PF15499//PF00091//PF00400//PF04115	Ubiquitin-specific peptidase-like, SUMO isopeptidase//Tubulin/FtsZ family, GTPase domain//WD domain, G-beta repeat//Ureidoglycolate hydrolase	GO:0006144//GO:0000256	purine nucleobase metabolic process//allantoin catabolic process	GO:0005515//GO:0050385//GO:0003924//GO:0032183//GO:0070140	protein binding//ureidoglycolate lyase activity//GTPase activity//SUMO binding//SUMO-specific isopeptidase activity	--	--
Cluster-242496.93967	--	--	--	--	--	--	--	--	--	--	--	--	--	--	--	--
Cluster-242496.117460	--	--	--	--	Q9ZUW3	1713	2.40E-189	Pentatricopeptide repeat-containing protein At2g27610 OS=Arabidopsis thaliana GN=PCMP-H60 PE=2 SV=1	PF17049	ATPase expression protein 1	GO:0006417	regulation of translation	GO:0045182	translation regulator activity	--	--
Cluster-242496.112353	--	--	--	--	--	--	--	--	--	--	--	--	--	--	--	--
Cluster-242496.72663	--	--	--	--	Q9SY02	1705	1.70E-188	Pentatricopeptide repeat-containing protein At4g02750 OS=Arabidopsis thaliana GN=PCMP-H24 PE=3 SV=1	PF13374//PF04121//PF12833//PF00515//PF01093//PF00637	Tetratricopeptide repeat//Nuclear pore protein 84 / 107//Helix-turn-helix domain//Tetratricopeptide repeat//Clusterin//Region in Clathrin and VPS	GO:0006810//GO:0006355//GO:0016192//GO:0008219//GO:0006886	transport//regulation of transcription, DNA-templated//vesicle-mediated transport//cell death//intracellular protein transport	GO:0005515//GO:0043565//GO:0003700	protein binding//sequence-specific DNA binding//transcription factor activity, sequence-specific DNA binding	GO:0005667//GO:0005643	transcription factor complex//nuclear pore
Cluster-242496.89389	--	--	--	--	--	--	--	--	PF01799	[2Fe-2S] binding domain	GO:0055114	oxidation-reduction process	GO:0016491//GO:0046872	oxidoreductase activity//metal ion binding	--	--
Cluster-242496.83546	K07407	E3.2.1.22B, galA, rafA	alpha-galactosidase	http://www.genome.jp/dbget-bin/www_bget?ko:K07407	Q9FT97	844	1.20E-88	Alpha-galactosidase 1 OS=Arabidopsis thaliana GN=AGAL1 PE=2 SV=1	PF02065//PF16499	Melibiase//Alpha galactosidase A	GO:0046486//GO:0001575//GO:0005975//GO:0006012	glycerolipid metabolic process//globoside metabolic process//carbohydrate metabolic process//galactose metabolic process	GO:0004557//GO:0004553	alpha-galactosidase activity//hydrolase activity, hydrolyzing O-glycosyl compounds	--	--
Cluster-242496.74966	--	--	--	--	Q9LTV8	1499	2.50E-164	Pentatricopeptide repeat-containing protein At3g12770 OS=Arabidopsis thaliana GN=PCMP-H43 PE=2 SV=1	PF02404//PF00637	Stem cell factor//Region in Clathrin and VPS	GO:0007165//GO:0016192//GO:0007155//GO:0006886	signal transduction//vesicle-mediated transport//cell adhesion//intracellular protein transport	GO:0005173	stem cell factor receptor binding	GO:0016020	membrane
Cluster-242496.55130	--	--	--	--	--	--	--	--	--	--	--	--	--	--	--	--
Cluster-242496.75242	--	--	--	--	P16128	172	1.30E-10	Uncharacterized protein At4g18490 OS=Arabidopsis thaliana GN=At4g18490 PE=2 SV=3	PF06083//PF12437//PF15202	Interleukin-17//Glutamine synthetase type III N terminal//Adipogenin	GO:0006954//GO:0009252//GO:0007165//GO:0006807//GO:0045444	inflammatory response//peptidoglycan biosynthetic process//signal transduction//nitrogen compound metabolic process//fat cell differentiation	GO:0005125//GO:0004356	cytokine activity//glutamate-ammonia ligase activity	GO:0005576	extracellular region
Cluster-242496.109594	--	--	--	--	Q9LRV9	848	2.20E-89	Pentatricopeptide repeat-containing protein At3g13880 OS=Arabidopsis thaliana GN=PCMP-E89 PE=2 SV=1	PF09477//PF13762//PF00515//PF13374//PF00637//PF17049//PF13414	Bacterial type II secretion system chaperone protein (type_III_yscG)//Mitochondrial splicing apparatus component//Tetratricopeptide repeat//Tetratricopeptide repeat//Region in Clathrin and VPS//ATPase expression protein 1//TPR repeat	GO:0009405//GO:0006886//GO:0006417//GO:0016192//GO:0000372	pathogenesis//intracellular protein transport//regulation of translation//vesicle-mediated transport//Group I intron splicing	GO:0045182//GO:0005515	translation regulator activity//protein binding	GO:0030529	intracellular ribonucleoprotein complex
Cluster-242496.89506	--	--	--	--	Q9XI60	724	7.50E-75	Lipid phosphate phosphatase 2 OS=Arabidopsis thaliana GN=LPP2 PE=2 SV=1	PF02780	Transketolase, C-terminal domain	GO:0008152	metabolic process	GO:0003824	catalytic activity	--	--
Cluster-242496.80576	--	--	--	--	--	--	--	--	--	--	--	--	--	--	--	--
Cluster-242496.136290	--	--	--	--	--	--	--	--	--	--	--	--	--	--	--	--
Cluster-242496.90437	--	--	--	--	P0C899	1595	8.10E-176	Putative pentatricopeptide repeat-containing protein At3g49142 OS=Arabidopsis thaliana GN=PCMP-H77 PE=3 SV=1	PF13176	Tetratricopeptide repeat	--	--	GO:0005515	protein binding	--	--
Cluster-242496.103613	--	--	--	--	Q9SCV4	1866	2.40E-207	Beta-galactosidase 8 OS=Arabidopsis thaliana GN=BGAL8 PE=2 SV=2	PF02449	Beta-galactosidase	GO:0006687//GO:0046486//GO:0006012//GO:0005975//GO:0006027	glycosphingolipid metabolic process//glycerolipid metabolic process//galactose metabolic process//carbohydrate metabolic process//glycosaminoglycan catabolic process	GO:0004565	beta-galactosidase activity	GO:0009341	beta-galactosidase complex
Cluster-242496.114280	K14321	NUPL2, CG1	nucleoporin-like protein 2	http://www.genome.jp/dbget-bin/www_bget?ko:K14321	Q9FWS3	575	1.30E-57	Zinc finger CCCH domain-containing protein 16 OS=Arabidopsis thaliana GN=CG1 PE=1 SV=2	PF00642	Zinc finger C-x8-C-x5-C-x3-H type (and similar)	--	--	GO:0046872	metal ion binding	--	--
Cluster-242496.105412	--	--	--	--	--	--	--	--	PF03547	Membrane transport protein	GO:0055085	transmembrane transport	--	--	GO:0016021	integral component of membrane
Cluster-242496.128901	--	--	--	--	Q52QU1	131	1.50E-06	Ethylene-responsive transcription factor ERF042 OS=Arabidopsis thaliana GN=ERF042 PE=2 SV=1	--	--	--	--	--	--	--	--
Cluster-242496.63217	--	--	--	--	--	--	--	--	PF00214//PF17070//PF15510	Calcitonin / CGRP / IAPP family//30S ribosomal protein Thx//Centromere kinetochore component W	GO:0007067//GO:0051382//GO:0007165	mitotic nuclear division//kinetochore assembly//signal transduction	GO:0003677//GO:0005179	DNA binding//hormone activity	GO:0005840//GO:0005576	ribosome//extracellular region
Cluster-242496.81185	--	--	--	--	--	--	--	--	--	--	--	--	--	--	--	--
Cluster-242496.88951	--	--	--	--	Q40392	227	7.10E-18	TMV resistance protein N OS=Nicotiana glutinosa GN=N PE=1 SV=1	PF00005//PF01582//PF04194//PF01443//PF13676//PF03205//PF00931	ABC transporter//TIR domain//Programmed cell death protein 2, C-terminal putative domain//Viral (Superfamily 1) RNA helicase//TIR domain//Molybdopterin guanine dinucleotide synthesis protein B//NB-ARC domain	GO:0007165//GO:0006777	signal transduction//Mo-molybdopterin cofactor biosynthetic process	GO:0016887//GO:0005525//GO:0043531//GO:0005524//GO:0005515	ATPase activity//GTP binding//ADP binding//ATP binding//protein binding	GO:0005737	cytoplasm
Cluster-242496.115316	--	--	--	--	--	--	--	--	--	--	--	--	--	--	--	--
Cluster-242496.102162	K14396	PABPN1, PABP2	polyadenylate-binding protein 2	http://www.genome.jp/dbget-bin/www_bget?ko:K14396	Q28165	193	5.00E-13	Polyadenylate-binding protein 2 OS=Bos taurus GN=PABPN1 PE=1 SV=3	PF00076	RNA recognition motif. (a.k.a. RRM, RBD, or RNP domain)	--	--	GO:0003676	nucleic acid binding	--	--
Cluster-242496.81738	--	--	--	--	Q9ZUU9	1747	2.40E-193	ABC transporter G family member 3 OS=Arabidopsis thaliana GN=ABCG3 PE=1 SV=2	PF07580//PF01926//PF00005//PF01061//PF01637//PF13304	M26 IgA1-specific Metallo-endopeptidase C-terminal region//50S ribosome-binding GTPase//ABC transporter//ABC-2 type transporter//Archaeal ATPase//AAA domain, putative AbiEii toxin, Type IV TA system	--	--	GO:0005525//GO:0004222//GO:0016887//GO:0008270//GO:0005524	GTP binding//metalloendopeptidase activity//ATPase activity//zinc ion binding//ATP binding	GO:0005618//GO:0005576//GO:0016020	cell wall//extracellular region//membrane
Cluster-242496.107640	--	--	--	--	A2ASS6	334	2.80E-29	Titin OS=Mus musculus GN=Ttn PE=1 SV=1	PF05923//PF05297	APC cysteine-rich region//Herpesvirus latent membrane protein 1 (LMP1)	GO:0016055//GO:0019087	Wnt signaling pathway//transformation of host cell by virus	--	--	GO:0016021	integral component of membrane
Cluster-242496.105990	K09533	DNAJC13	DnaJ homolog subfamily C member 13	http://www.genome.jp/dbget-bin/www_bget?ko:K09533	O75165	233	2.10E-17	DnaJ homolog subfamily C member 13 OS=Homo sapiens GN=DNAJC13 PE=1 SV=5	PF06303//PF01269//PF08094//PF08108	Organiser of macrodomain of Terminus of chromosome//Fibrillarin//Conotoxin TVIIA/GS family//Halocidin family	GO:0006810//GO:0009405//GO:0042742//GO:0008033//GO:0006364	transport//pathogenesis//defense response to bacterium//tRNA processing//rRNA processing	GO:0043565//GO:0008168//GO:0003723//GO:0019871	sequence-specific DNA binding//methyltransferase activity//RNA binding//sodium channel inhibitor activity	GO:0005576	extracellular region
Cluster-242496.54161	--	--	--	--	--	--	--	--	--	--	--	--	--	--	--	--
Cluster-242496.113032	--	--	--	--	P04323	134	1.40E-06	Retrovirus-related Pol polyprotein from transposon 17.6 OS=Drosophila melanogaster GN=pol PE=3 SV=1	--	--	--	--	--	--	--	--
Cluster-242496.87782	--	--	--	--	--	--	--	--	PF00072	Response regulator receiver domain	GO:0000160	phosphorelay signal transduction system	--	--	--	--
Cluster-242496.138679	--	--	--	--	--	--	--	--	PF02536	mTERF	GO:0006355	regulation of transcription, DNA-templated	GO:0003690	double-stranded DNA binding	GO:0005739	mitochondrion
Cluster-242496.106746	--	--	--	--	--	--	--	--	PF00397	WW domain	--	--	GO:0005515	protein binding	--	--
Cluster-242496.109739	--	--	--	--	O49607	281	8.30E-24	Subtilisin-like protease SBT1.6 OS=Arabidopsis thaliana GN=SBT1.6 PE=2 SV=1	PF00082	Subtilase family	GO:0006508	proteolysis	GO:0004252	serine-type endopeptidase activity	--	--
Cluster-242496.89634	K13510	LPCAT1_2	lysophosphatidylcholine acyltransferase / lyso-PAF acetyltransferase	http://www.genome.jp/dbget-bin/www_bget?ko:K13510	Q8S8S2	1452	2.70E-159	Lysophospholipid acyltransferase LPEAT2 OS=Arabidopsis thaliana GN=LPEAT2 PE=1 SV=1	PF13833//PF12763//PF00036//PF13499//PF01553//PF13405	EF-hand domain pair//Cytoskeletal-regulatory complex EF hand//EF hand//EF-hand domain pair//Acyltransferase//EF-hand domain	GO:0008152	metabolic process	GO:0016746//GO:0005509//GO:0005515	transferase activity, transferring acyl groups//calcium ion binding//protein binding	--	--
Cluster-242496.103167	K01728	pel	pectate lyase	http://www.genome.jp/dbget-bin/www_bget?ko:K01728	Q9C5M8	1605	4.70E-177	Probable pectate lyase 18 OS=Arabidopsis thaliana GN=At4g24780 PE=2 SV=2	--	--	--	--	--	--	--	--
Cluster-242496.92837	--	--	--	--	Q944N1	142	1.60E-07	Chromo domain protein LHP1 OS=Solanum lycopersicum GN=LHP1 PE=1 SV=2	--	--	--	--	--	--	--	--
Cluster-242496.108233	--	--	--	--	--	--	--	--	PF08057	Erythromycin resistance leader peptide	GO:0046677	response to antibiotic	--	--	--	--
Cluster-242496.95340	--	--	--	--	--	--	--	--	PF08302	Fungal tRNA ligase phosphodiesterase domain	GO:0006388	tRNA splicing, via endonucleolytic cleavage and ligation	GO:0003972//GO:0005524	RNA ligase (ATP) activity//ATP binding	--	--
Cluster-242496.122986	--	--	--	--	Q9SLP4	983	3.90E-105	Chitinase 1 OS=Tulipa bakeri PE=1 SV=1	PF00704	Glycosyl hydrolases family 18	GO:0005975	carbohydrate metabolic process	GO:0004553	hydrolase activity, hydrolyzing O-glycosyl compounds	--	--
Cluster-242496.88304	--	--	--	--	Q8RVL2	6831	0.00E+00	Calpain-type cysteine protease DEK1 OS=Arabidopsis thaliana GN=DEK1 PE=1 SV=1	PF11770//PF00648	GRB2-binding adapter (GAPT)//Calpain family cysteine protease	GO:0006508	proteolysis	GO:0004198	calcium-dependent cysteine-type endopeptidase activity	GO:0016021//GO:0005622	integral component of membrane//intracellular
Cluster-242496.93328	--	--	--	--	Q0WRY5	911	2.40E-96	Serine/threonine-protein kinase CDL1 OS=Arabidopsis thaliana GN=CDL1 PE=1 SV=1	PF00069//PF07714//PF01312	Protein kinase domain//Protein tyrosine kinase//FlhB HrpN YscU SpaS Family	GO:0006468//GO:0009306	protein phosphorylation//protein secretion	GO:0005524//GO:0004672	ATP binding//protein kinase activity	GO:0016020	membrane
Cluster-242496.91061	--	--	--	--	Q9ZV53	217	5.30E-16	Putative RING-H2 finger protein ATL49 OS=Arabidopsis thaliana GN=ATL49 PE=3 SV=1	PF12678//PF14634//PF17123//PF00628//PF13639//PF12861//PF02306//PF00097//PF12906	RING-H2 zinc finger//zinc-RING finger domain//RING-like zinc finger//PHD-finger//Ring finger domain//Anaphase-promoting complex subunit 11 RING-H2 finger//Major spike protein (G protein)//Zinc finger, C3HC4 type (RING finger)//RING-variant domain	GO:0016567//GO:0019048	protein ubiquitination//modulation by virus of host morphology or physiology	GO:0046872//GO:0004842//GO:0008270//GO:0005515	metal ion binding//ubiquitin-protein transferase activity//zinc ion binding//protein binding	GO:0005680	anaphase-promoting complex
Cluster-342228.0	--	--	--	--	--	--	--	--	--	--	--	--	--	--	--	--
Cluster-242496.109439	--	--	--	--	Q84WW5	371	2.70E-33	Vesicle-associated protein 1-3 OS=Arabidopsis thaliana GN=PVA13 PE=2 SV=1	PF01801	Cytomegalovirus glycoprotein L	GO:0016032	viral process	--	--	GO:0019031	viral envelope
Cluster-242496.89784	--	--	--	--	--	--	--	--	--	--	--	--	--	--	--	--
Cluster-242496.106639	--	--	--	--	--	--	--	--	--	--	--	--	--	--	--	--
Cluster-242496.97394	K09843	E1.14.13.93	(+)-abscisic acid 8'-hydroxylase	http://www.genome.jp/dbget-bin/www_bget?ko:K09843	Q949P1	833	1.50E-87	Abscisic acid 8'-hydroxylase 1 OS=Arabidopsis thaliana GN=CYP707A1 PE=2 SV=1	PF00067	Cytochrome P450	GO:0055114	oxidation-reduction process	GO:0016705//GO:0005506//GO:0020037	oxidoreductase activity, acting on paired donors, with incorporation or reduction of molecular oxygen//iron ion binding//heme binding	--	--
Cluster-242496.90655	--	--	--	--	--	--	--	--	--	--	--	--	--	--	--	--
Cluster-242496.82443	K17925	SNX13	sorting nexin-13	http://www.genome.jp/dbget-bin/www_bget?ko:K17925	--	--	--	--	PF00787//PF09334	PX domain//tRNA synthetases class I (M)	GO:0006418	tRNA aminoacylation for protein translation	GO:0035091//GO:0004812//GO:0000166//GO:0005524	phosphatidylinositol binding//aminoacyl-tRNA ligase activity//nucleotide binding//ATP binding	--	--
Cluster-242496.89946	--	--	--	--	Q9FN11	309	2.70E-26	LOB domain-containing protein 37 OS=Arabidopsis thaliana GN=LBD37 PE=2 SV=1	PF00843//PF12470	Arenavirus nucleocapsid protein//Suppressor of Fused Gli/Ci N terminal binding domain	--	--	GO:0005515	protein binding	GO:0019013	viral nucleocapsid
Cluster-242496.91265	--	--	--	--	Q68DN1	160	4.50E-09	Uncharacterized protein C2orf16 OS=Homo sapiens GN=C2orf16 PE=2 SV=3	PF00076	RNA recognition motif. (a.k.a. RRM, RBD, or RNP domain)	--	--	GO:0003676	nucleic acid binding	--	--
Cluster-242496.84760	--	--	--	--	P59326	517	1.20E-50	YTH domain-containing family protein 1 OS=Mus musculus GN=Ythdf1 PE=2 SV=1	PF06305//PF14943	Protein of unknown function (DUF1049)//Mitochondrial ribosome subunit S26	--	--	--	--	GO:0005763//GO:0005887	mitochondrial small ribosomal subunit//integral component of plasma membrane
Cluster-242496.75238	--	--	--	--	--	--	--	--	PF02935	Cytochrome c oxidase subunit VIIc	GO:0015992//GO:0006123	proton transport//mitochondrial electron transport, cytochrome c to oxygen	GO:0004129	cytochrome-c oxidase activity	GO:0045277	respiratory chain complex IV
Cluster-242496.114453	--	--	--	--	Q93Z75	588	5.70E-59	Ureide permease 5 OS=Arabidopsis thaliana GN=UPS5 PE=1 SV=1	PF05038//PF07168	Cytochrome Cytochrome b558 alpha-subunit//Ureide permease	GO:0071705	nitrogen compound transport	GO:0020037	heme binding	--	--
Cluster-242496.91869	--	--	--	--	P49592	141	4.40E-07	Protein Dr1 homolog OS=Arabidopsis thaliana GN=DR1 PE=2 SV=1	PF02988	Phospholipase A2 inhibitor	--	--	GO:0004859	phospholipase inhibitor activity	GO:0005576	extracellular region
Cluster-242496.94790	--	--	--	--	--	--	--	--	--	--	--	--	--	--	--	--
Cluster-242496.116959	--	--	--	--	Q40392	353	1.50E-31	TMV resistance protein N OS=Nicotiana glutinosa GN=N PE=1 SV=1	PF13676//PF00931//PF06951//PF00004//PF01061//PF01582//PF01637	TIR domain//NB-ARC domain//Group XII secretory phospholipase A2 precursor (PLA2G12)//ATPase family associated with various cellular activities (AAA)//ABC-2 type transporter//TIR domain//Archaeal ATPase	GO:0007165//GO:0009395//GO:0016042	signal transduction//phospholipid catabolic process//lipid catabolic process	GO:0043531//GO:0004623//GO:0005509//GO:0005524//GO:0005515	ADP binding//phospholipase A2 activity//calcium ion binding//ATP binding//protein binding	GO:0005576//GO:0016020	extracellular region//membrane
Cluster-242496.108099	K18422	MOV10	helicase MOV-10	http://www.genome.jp/dbget-bin/www_bget?ko:K18422	Q8GYD9	1646	1.90E-181	Probable RNA helicase SDE3 OS=Arabidopsis thaliana GN=SDE3 PE=1 SV=1	PF00004//PF01637//PF04851//PF13361//PF05970//PF00580//PF02562	ATPase family associated with various cellular activities (AAA)//Archaeal ATPase//Type III restriction enzyme, res subunit//UvrD-like helicase C-terminal domain//PIF1-like helicase//UvrD/REP helicase N-terminal domain//PhoH-like protein	GO:0000723//GO:0006281	telomere maintenance//DNA repair	GO:0016787//GO:0003678//GO:0003677//GO:0005524	hydrolase activity//DNA helicase activity//DNA binding//ATP binding	GO:0005657	replication fork
Cluster-242496.91803	--	--	--	--	--	--	--	--	PF00403//PF00804	Heavy-metal-associated domain//Syntaxin	GO:0030001	metal ion transport	GO:0046872	metal ion binding	GO:0016020	membrane
Cluster-242496.121750	--	--	--	--	--	--	--	--	PF02984	Cyclin, C-terminal domain	--	--	--	--	GO:0005634	nucleus
Cluster-242496.116701	K01164	POP1	ribonuclease P/MRP protein subunit POP1	http://www.genome.jp/dbget-bin/www_bget?ko:K01164	Q99575	183	6.00E-12	Ribonucleases P/MRP protein subunit POP1 OS=Homo sapiens GN=POP1 PE=1 SV=2	PF08513//PF06978//PF08170	LisH//Ribonucleases P/MRP protein subunit POP1//POPLD (NUC188) domain	GO:0051252//GO:0001682//GO:0008033//GO:0006396	regulation of RNA metabolic process//tRNA 5'-leader removal//tRNA processing//RNA processing	GO:0005515//GO:0004526	protein binding//ribonuclease P activity	GO:0030677	ribonuclease P complex
Cluster-242496.109780	--	--	--	--	--	--	--	--	--	--	--	--	--	--	--	--
Cluster-242496.84524	--	--	--	--	Q3T9Z9	223	1.10E-16	Zinc finger with UFM1-specific peptidase domain protein OS=Mus musculus GN=Zufsp PE=2 SV=2	PF00569//PF02198	Zinc finger, ZZ type//Sterile alpha motif (SAM)/Pointed domain	--	--	GO:0008270//GO:0043565	zinc ion binding//sequence-specific DNA binding	GO:0005634	nucleus
Cluster-242496.109442	--	--	--	--	--	--	--	--	--	--	--	--	--	--	--	--
Cluster-242496.103381	--	--	--	--	--	--	--	--	--	--	--	--	--	--	--	--
Cluster-242496.117691	--	--	--	--	Q9LS25	1435	3.00E-157	Pentatricopeptide repeat-containing protein At5g46580, chloroplastic OS=Arabidopsis thaliana GN=At5g46580 PE=2 SV=1	PF13374//PF13414//PF08030	Tetratricopeptide repeat//TPR repeat//Ferric reductase NAD binding domain	GO:0055114	oxidation-reduction process	GO:0005515//GO:0016491	protein binding//oxidoreductase activity	--	--
Cluster-242496.126932	--	--	--	--	--	--	--	--	--	--	--	--	--	--	--	--
Cluster-242496.89319	K07198	PRKAA, AMPK	5'-AMP-activated protein kinase, catalytic alpha subunit	http://www.genome.jp/dbget-bin/www_bget?ko:K07198	Q6ZLP5	1056	4.40E-113	CBL-interacting protein kinase 23 OS=Oryza sativa subsp. japonica GN=CIPK23 PE=2 SV=1	PF06293//PF03822//PF07714//PF02298//PF00322//PF00069	Lipopolysaccharide kinase (Kdo/WaaP) family//NAF domain//Protein tyrosine kinase//Plastocyanin-like domain//Endothelin family//Protein kinase domain	GO:0006118//GO:0019229//GO:0006468//GO:0007165	obsolete electron transport//regulation of vasoconstriction//protein phosphorylation//signal transduction	GO:0005524//GO:0009055//GO:0016773//GO:0004672	ATP binding//electron carrier activity//phosphotransferase activity, alcohol group as acceptor//protein kinase activity	GO:0016020//GO:0005576	membrane//extracellular region
Cluster-242496.107506	K11864	BRCC3	BRCA1/BRCA2-containing complex subunit 3	http://www.genome.jp/dbget-bin/www_bget?ko:K11864	B5X8M4	412	1.10E-38	Lys-63-specific deubiquitinase BRCC36 OS=Salmo salar GN=brcc3 PE=2 SV=1	PF01398	JAB1/Mov34/MPN/PAD-1 ubiquitin protease	--	--	GO:0005515	protein binding	--	--
Cluster-242496.108650	--	--	--	--	Q5BQN5	331	9.00E-29	WPP domain-associated protein (Fragment) OS=Solanum lycopersicum GN=WAP PE=1 SV=1	PF13520//PF01350//PF02517//PF15894//PF10723	Amino acid permease//Flavivirus non-structural protein NS4A//CAAX protease self-immunity//Inhibitor of glucose uptake transporter SgrT//Replication regulatory protein RepB	GO:0006865//GO:0006276//GO:0016070//GO:0016032//GO:0003333//GO:0046325	amino acid transport//plasmid maintenance//RNA metabolic process//viral process//amino acid transmembrane transport//negative regulation of glucose import	GO:0015171	amino acid transmembrane transporter activity	GO:0016020//GO:0019012	membrane//virion
Cluster-242496.85819	--	--	--	--	--	--	--	--	PF03894//PF06414	D-xylulose 5-phosphate/D-fructose 6-phosphate phosphoketolase//Zeta toxin	GO:0005975	carbohydrate metabolic process	GO:0016832//GO:0016301//GO:0005524	aldehyde-lyase activity//kinase activity//ATP binding	--	--
Cluster-242496.94400	--	--	--	--	Q9CXF7	1221	2.50E-132	Chromodomain-helicase-DNA-binding protein 1-like OS=Mus musculus GN=Chd1l PE=2 SV=1	PF04851//PF00176	Type III restriction enzyme, res subunit//SNF2 family N-terminal domain	--	--	GO:0003677//GO:0005524//GO:0016787	DNA binding//ATP binding//hydrolase activity	--	--
Cluster-242496.88468	--	--	--	--	Q9FZF1	590	2.20E-59	Peroxisomal membrane protein 11A OS=Arabidopsis thaliana GN=PEX11A PE=1 SV=1	PF05797//PF05648	Yeast trans-acting factor (REP1/REP2)//Peroxisomal biogenesis factor 11 (PEX11)	GO:0030541//GO:0016559	plasmid partitioning//peroxisome fission	--	--	GO:0005779	integral component of peroxisomal membrane
Cluster-242496.91016	--	--	--	--	--	--	--	--	--	--	--	--	--	--	--	--
Cluster-242496.82934	--	--	--	--	P0C2F6	136	2.20E-06	Putative ribonuclease H protein At1g65750 OS=Arabidopsis thaliana GN=At1g65750 PE=3 SV=1	--	--	--	--	--	--	--	--
Cluster-242496.103334	--	--	--	--	--	--	--	--	--	--	--	--	--	--	--	--
Cluster-242496.66649	--	--	--	--	--	--	--	--	PF08558	Telomere repeat binding factor (TRF)	--	--	GO:0042162//GO:0042803	telomeric DNA binding//protein homodimerization activity	--	--
Cluster-242496.90389	--	--	--	--	Q766C3	397	6.50E-37	Aspartic proteinase nepenthesin-1 OS=Nepenthes gracilis GN=nep1 PE=1 SV=1	PF00026	Eukaryotic aspartyl protease	GO:0006508	proteolysis	GO:0004190	aspartic-type endopeptidase activity	--	--
Cluster-242496.86683	K00432	E1.11.1.9	glutathione peroxidase	http://www.genome.jp/dbget-bin/www_bget?ko:K00432	P52032	242	2.10E-19	Phospholipid hydroperoxide glutathione peroxidase 1, chloroplastic OS=Arabidopsis thaliana GN=GPX1 PE=2 SV=2	PF00578//PF08534//PF00255	AhpC/TSA family//Redoxin//Glutathione peroxidase	GO:0006804//GO:0006749//GO:0055114//GO:0006979	obsolete peroxidase reaction//glutathione metabolic process//oxidation-reduction process//response to oxidative stress	GO:0016491//GO:0004602//GO:0016209	oxidoreductase activity//glutathione peroxidase activity//antioxidant activity	--	--
Cluster-242496.103321	--	--	--	--	Q8LBL5	195	3.50E-13	E3 ubiquitin-protein ligase PRT1 OS=Arabidopsis thaliana GN=PRT1 PE=2 SV=2	--	--	--	--	--	--	--	--
Cluster-242496.85348	--	--	--	--	--	--	--	--	--	--	--	--	--	--	--	--
Cluster-242496.102497	K12133	LHY	MYB-related transcription factor LHY	http://www.genome.jp/dbget-bin/www_bget?ko:K12133	Q6R0H1	357	8.60E-32	Protein LHY OS=Arabidopsis thaliana GN=LHY PE=1 SV=2	PF07859//PF02932	alpha/beta hydrolase fold//Neurotransmitter-gated ion-channel transmembrane region	GO:0006811//GO:0008152	ion transport//metabolic process	GO:0016787	hydrolase activity	GO:0016020	membrane
Cluster-242496.113904	--	--	--	--	--	--	--	--	--	--	--	--	--	--	--	--
Cluster-242496.92687	--	--	--	--	Q96FB5	200	3.90E-14	Protein RRNAD1 OS=Homo sapiens GN=RRNAD1 PE=2 SV=2	--	--	--	--	--	--	--	--
Cluster-242496.107652	--	--	--	--	Q9FJX6	940	1.00E-99	Formin-like protein 6 OS=Arabidopsis thaliana GN=FH6 PE=2 SV=1	--	--	--	--	--	--	--	--
Cluster-242496.75863	--	--	--	--	--	--	--	--	PF01494//PF05834//PF01266//PF07992//PF12831//PF01134//PF01593	FAD binding domain//Lycopene cyclase protein//FAD dependent oxidoreductase//Pyridine nucleotide-disulphide oxidoreductase//FAD dependent oxidoreductase//Glucose inhibited division protein A//Flavin containing amine oxidoreductase	GO:0016117//GO:0008033//GO:0055114	carotenoid biosynthetic process//tRNA processing//oxidation-reduction process	GO:0071949//GO:0016491//GO:0016705//GO:0050660	FAD binding//oxidoreductase activity//oxidoreductase activity, acting on paired donors, with incorporation or reduction of molecular oxygen//flavin adenine dinucleotide binding	--	--
Cluster-242496.98505	K02634	petA	apocytochrome f	http://www.genome.jp/dbget-bin/www_bget?ko:K02634	B1VKB7	1555	3.90E-171	Cytochrome f OS=Cryptomeria japonica GN=petA PE=3 SV=1	PF03040//PF01333//PF02392	CemA family//Apocytochrome F, C-terminal//Ycf4	GO:0006118//GO:0015979	obsolete electron transport//photosynthesis	GO:0009055//GO:0005506//GO:0020037	electron carrier activity//iron ion binding//heme binding	GO:0009522//GO:0016021//GO:0009579//GO:0031361	photosystem I//integral component of membrane//thylakoid//integral component of thylakoid membrane
Cluster-242496.115332	--	--	--	--	Q9SA60	954	2.40E-101	Pentatricopeptide repeat-containing protein At1g03100, mitochondrial OS=Arabidopsis thaliana GN=At1g03100 PE=2 SV=1	PF03786	D-mannonate dehydratase (UxuA)	GO:0006064	glucuronate catabolic process	GO:0008927	mannonate dehydratase activity	--	--
Cluster-242496.104852	--	--	--	--	Q9STF3	606	1.70E-61	Pentatricopeptide repeat-containing protein At3g46790, chloroplastic OS=Arabidopsis thaliana GN=CRR2 PE=2 SV=1	PF17049//PF04983//PF00637	ATPase expression protein 1//RNA polymerase Rpb1, domain 3//Region in Clathrin and VPS	GO:0006144//GO:0016192//GO:0006351//GO:0006417//GO:0006206//GO:0006886	purine nucleobase metabolic process//vesicle-mediated transport//transcription, DNA-templated//regulation of translation//pyrimidine nucleobase metabolic process//intracellular protein transport	GO:0003677//GO:0003899//GO:0045182	DNA binding//DNA-directed RNA polymerase activity//translation regulator activity	GO:0005730	nucleolus
Cluster-242496.87207	--	--	--	--	--	--	--	--	--	--	--	--	--	--	--	--
Cluster-242496.78298	K10884	XRCC6, KU70, G22P1	ATP-dependent DNA helicase 2 subunit 1	http://www.genome.jp/dbget-bin/www_bget?ko:K10884	Q9FQ08	1592	2.10E-175	ATP-dependent DNA helicase 2 subunit KU70 OS=Arabidopsis thaliana GN=KU70 PE=1 SV=1	PF02735//PF03730	Ku70/Ku80 beta-barrel domain//Ku70/Ku80 C-terminal arm	GO:0006303	double-strand break repair via nonhomologous end joining	GO:0003677//GO:0004003	DNA binding//ATP-dependent DNA helicase activity	GO:0005657	replication fork
Cluster-242496.10247	--	--	--	--	--	--	--	--	--	--	--	--	--	--	--	--
Cluster-242496.112134	--	--	--	--	Q9SMT7	1730	1.70E-191	Oxalate--CoA ligase OS=Arabidopsis thaliana GN=AAE3 PE=1 SV=1	PF00501//PF06596	AMP-binding enzyme//Photosystem II reaction centre X protein (PsbX)	GO:0015979//GO:0008152	photosynthesis//metabolic process	GO:0003824	catalytic activity	GO:0016020//GO:0009523	membrane//photosystem II
Cluster-242496.123744	--	--	--	--	--	--	--	--	PF02536//PF02909	mTERF//Tetracyclin repressor, C-terminal all-alpha domain	GO:0006355//GO:0045892	regulation of transcription, DNA-templated//negative regulation of transcription, DNA-templated	GO:0003690	double-stranded DNA binding	GO:0005739	mitochondrion
Cluster-242496.121093	K08145	SLC2A8, GLUT8	MFS transporter, SP family, solute carrier family 2 (facilitated glucose transporter), member 8	http://www.genome.jp/dbget-bin/www_bget?ko:K08145	Q9FRL3	531	2.10E-52	Sugar transporter ERD6-like 6 OS=Arabidopsis thaliana GN=At1g75220 PE=1 SV=1	PF07690//PF01184//PF00083	Major Facilitator Superfamily//GPR1/FUN34/yaaH family//Sugar (and other) transporter	GO:0055085	transmembrane transport	GO:0022857	transmembrane transporter activity	GO:0016021	integral component of membrane
Cluster-242496.89549	--	--	--	--	--	--	--	--	--	--	--	--	--	--	--	--
Cluster-242496.93255	K08737	MSH6	DNA mismatch repair protein MSH6	http://www.genome.jp/dbget-bin/www_bget?ko:K08737	Q9SMV7	2504	4.80E-281	DNA mismatch repair protein MSH7 OS=Arabidopsis thaliana GN=MSH7 PE=1 SV=1	PF05192//PF00488//PF05180//PF04879//PF01624//PF05188	MutS domain III//MutS domain V//DNL zinc finger//Molybdopterin oxidoreductase Fe4S4 domain//MutS domain I//MutS domain II	GO:0055114//GO:0006298	oxidation-reduction process//mismatch repair	GO:0030983//GO:0008270//GO:0016491//GO:0005524	mismatched DNA binding//zinc ion binding//oxidoreductase activity//ATP binding	--	--
Cluster-242496.93388	K15718	LOX1_5	linoleate 9S-lipoxygenase	http://www.genome.jp/dbget-bin/www_bget?ko:K15718	Q43191	2739	0.00E+00	Probable linoleate 9S-lipoxygenase 5 OS=Solanum tuberosum GN=LOX1.5 PE=2 SV=1	PF00305//PF01477	Lipoxygenase//PLAT/LH2 domain	GO:0055114	oxidation-reduction process	GO:0016702//GO:0046872//GO:0005515	oxidoreductase activity, acting on single donors with incorporation of molecular oxygen, incorporation of two atoms of oxygen//metal ion binding//protein binding	--	--
Cluster-242496.115765	--	--	--	--	O04086	1420	2.10E-155	Probable receptor-like protein kinase At1g11050 OS=Arabidopsis thaliana GN=At1g11050 PE=2 SV=1	PF00069//PF07714	Protein kinase domain//Protein tyrosine kinase	GO:0006468	protein phosphorylation	GO:0004672//GO:0005524	protein kinase activity//ATP binding	--	--
Cluster-242496.116941	K10896	FANCM	fanconi anemia group M protein	http://www.genome.jp/dbget-bin/www_bget?ko:K10896	Q8IYD8	1098	8.10E-118	Fanconi anemia group M protein OS=Homo sapiens GN=FANCM PE=1 SV=2	PF04851//PF01288//PF00270	Type III restriction enzyme, res subunit//7,8-dihydro-6-hydroxymethylpterin-pyrophosphokinase (HPPK)//DEAD/DEAH box helicase	GO:0009396//GO:0046656	folic acid-containing compound biosynthetic process//folic acid biosynthetic process	GO:0003676//GO:0016787//GO:0005524//GO:0003677//GO:0003848	nucleic acid binding//hydrolase activity//ATP binding//DNA binding//2-amino-4-hydroxy-6-hydroxymethyldihydropteridine diphosphokinase activity	--	--
Cluster-242496.114721	--	--	--	--	--	--	--	--	--	--	--	--	--	--	--	--
Cluster-242496.78206	--	--	--	--	Q2R3F5	1210	5.80E-131	Auxin response factor 23 OS=Oryza sativa subsp. japonica GN=ARF23 PE=1 SV=2	PF02362//PF02309//PF03408//PF00643//PF06507	B3 DNA binding domain//AUX/IAA family//Foamy virus envelope protein//B-box zinc finger//Auxin response factor	GO:0009725//GO:0006355	response to hormone//regulation of transcription, DNA-templated	GO:0003677//GO:0008270	DNA binding//zinc ion binding	GO:0005634//GO:0005622//GO:0019031	nucleus//intracellular//viral envelope
Cluster-242496.93922	--	--	--	--	--	--	--	--	--	--	--	--	--	--	--	--
Cluster-242496.107799	--	--	--	--	Q9LK35	416	2.10E-39	Receptor-like protein kinase THESEUS 1 OS=Arabidopsis thaliana GN=THE1 PE=1 SV=1	PF07714//PF00069	Protein tyrosine kinase//Protein kinase domain	GO:0006468	protein phosphorylation	GO:0005524//GO:0004672	ATP binding//protein kinase activity	--	--
Cluster-242496.89504	--	--	--	--	--	--	--	--	PF00560//PF13855	Leucine Rich Repeat//Leucine rich repeat	--	--	GO:0005515	protein binding	--	--
Cluster-242496.48623	--	--	--	--	--	--	--	--	--	--	--	--	--	--	--	--
Cluster-242496.119585	--	--	--	--	Q9XIQ7	1077	8.10E-116	Probable folate-biopterin transporter 7 OS=Arabidopsis thaliana GN=At1g64890 PE=2 SV=1	PF11023//PF03092//PF07690	Zinc-ribbon containing domain//BT1 family//Major Facilitator Superfamily	GO:0006810//GO:0055085	transport//transmembrane transport	--	--	GO:0016021//GO:0005887	integral component of membrane//integral component of plasma membrane
Cluster-242496.49257	--	--	--	--	--	--	--	--	--	--	--	--	--	--	--	--
Cluster-242496.66434	--	--	--	--	--	--	--	--	--	--	--	--	--	--	--	--
Cluster-242496.91151	--	--	--	--	--	--	--	--	--	--	--	--	--	--	--	--
Cluster-242496.124284	--	--	--	--	Q84LH3	516	7.80E-51	Werner Syndrome-like exonuclease OS=Arabidopsis thaliana GN=WEX PE=1 SV=1	PF01612	3'-5' exonuclease	GO:0006139	nucleobase-containing compound metabolic process	GO:0003676//GO:0008408	nucleic acid binding//3'-5' exonuclease activity	--	--
Cluster-242496.86572	K11138	RIF1	telomere-associated protein RIF1	http://www.genome.jp/dbget-bin/www_bget?ko:K11138	Q6PR54	138	1.20E-06	Telomere-associated protein RIF1 OS=Mus musculus GN=Rif1 PE=1 SV=2	PF00895	ATP synthase protein 8	GO:0015986//GO:0015992	ATP synthesis coupled proton transport//proton transport	GO:0015078	hydrogen ion transmembrane transporter activity	GO:0000276	mitochondrial proton-transporting ATP synthase complex, coupling factor F(o)
Cluster-242496.96982	K08873	SMG1	PI-3-kinase-related kinase SMG-1	http://www.genome.jp/dbget-bin/www_bget?ko:K08873	Q8BKX6	1191	2.80E-128	Serine/threonine-protein kinase SMG1 OS=Mus musculus GN=Smg1 PE=1 SV=3	PF02260//PF00454//PF08771//PF13414//PF15785	FATC domain//Phosphatidylinositol 3- and 4-kinase//Rapamycin binding domain//TPR repeat//Serine/threonine-protein kinase smg-1	GO:0000184//GO:0009069//GO:0016310	nuclear-transcribed mRNA catabolic process, nonsense-mediated decay//serine family amino acid metabolic process//phosphorylation	GO:0016773//GO:0004674//GO:0008144//GO:0005515	phosphotransferase activity, alcohol group as acceptor//protein serine/threonine kinase activity//drug binding//protein binding	--	--
Cluster-242496.113455	--	--	--	--	Q9MAP5	715	1.30E-73	Subtilisin-like protease SBT3.3 OS=Arabidopsis thaliana GN=SBT3.3 PE=2 SV=1	PF00082//PF17112	Subtilase family//Mitochondrial import receptor subunit Tom6, fungal	GO:0006508//GO:0030150	proteolysis//protein import into mitochondrial matrix	GO:0004252	serine-type endopeptidase activity	GO:0005742	mitochondrial outer membrane translocase complex
Cluster-242496.92340	--	--	--	--	Q9SV09	284	7.60E-24	Zinc finger CCCH domain-containing protein 46 OS=Arabidopsis thaliana GN=At3g51950 PE=1 SV=1	PF06072//PF00076//PF01956	Alphaherpesvirus tegument protein US9//RNA recognition motif. (a.k.a. RRM, RBD, or RNP domain)//Integral membrane protein DUF106	--	--	GO:0003676	nucleic acid binding	GO:0019033//GO:0016020	viral tegument//membrane
Cluster-242496.105755	--	--	--	--	P0DI71	556	2.30E-55	CASP-like protein 5B1 OS=Ginkgo biloba GN=gba_locus_13664 PE=3 SV=1	PF01284//PF02796	Membrane-associating domain//Helix-turn-helix domain of resolvase	GO:0006310	DNA recombination	GO:0003677//GO:0000150	DNA binding//recombinase activity	GO:0016020	membrane
Cluster-242496.75261	--	--	--	--	--	--	--	--	--	--	--	--	--	--	--	--
Cluster-242496.95019	--	--	--	--	Q4FZQ0	314	2.00E-27	Protein YIF1B-B OS=Xenopus laevis GN=yif1b-b PE=2 SV=1	--	--	--	--	--	--	--	--
Cluster-242496.76566	K09422	MYBP	myb proto-oncogene protein, plant	http://www.genome.jp/dbget-bin/www_bget?ko:K09422	Q8LPH6	418	2.30E-39	Transcription factor MYB86 OS=Arabidopsis thaliana GN=MYB86 PE=2 SV=1	PF09111	SLIDE	GO:0006338	chromatin remodeling	GO:0016818//GO:0005524//GO:0003676	hydrolase activity, acting on acid anhydrides, in phosphorus-containing anhydrides//ATP binding//nucleic acid binding	GO:0005634	nucleus
Cluster-242496.90778	--	--	--	--	--	--	--	--	--	--	--	--	--	--	--	--
Cluster-242496.68585	--	--	--	--	--	--	--	--	--	--	--	--	--	--	--	--
Cluster-242496.111172	--	--	--	--	Q9MAH1	1367	3.40E-149	TPR repeat-containing thioredoxin TTL1 OS=Arabidopsis thaliana GN=TTL1 PE=1 SV=1	PF13176//PF00085//PF13414//PF00515//PF13181//PF13371	Tetratricopeptide repeat//Thioredoxin//TPR repeat//Tetratricopeptide repeat//Tetratricopeptide repeat//Tetratricopeptide repeat	GO:0045454	cell redox homeostasis	GO:0005515	protein binding	--	--
Cluster-242496.118256	--	--	--	--	Q9QXN3	316	1.20E-27	Activating signal cointegrator 1 OS=Mus musculus GN=Trip4 PE=1 SV=2	--	--	--	--	--	--	--	--
Cluster-242496.105869	--	--	--	--	--	--	--	--	--	--	--	--	--	--	--	--
Cluster-242496.103591	--	--	--	--	--	--	--	--	PF01708	Geminivirus putative movement protein	GO:0046740	transport of virus in host, cell to cell	--	--	GO:0016021	integral component of membrane
Cluster-242496.93274	--	--	--	--	Q8LK56	1574	5.20E-173	Transcriptional activator DEMETER OS=Arabidopsis thaliana GN=DME PE=1 SV=2	PF05366//PF02891//PF00444//PF10576//PF12356//PF00730	Sarcolipin//MIZ/SP-RING zinc finger//Ribosomal protein L36//Iron-sulfur binding domain of endonuclease III//Protein of unknown function (DUF3643)//HhH-GPD superfamily base excision DNA repair protein	GO:0006412//GO:0016567//GO:0032465//GO:0042254//GO:0006915//GO:0006284	translation//protein ubiquitination//regulation of cytokinesis//ribosome biogenesis//apoptotic process//base-excision repair	GO:0004842//GO:0003735//GO:0008270//GO:0051539//GO:0030234	ubiquitin-protein transferase activity//structural constituent of ribosome//zinc ion binding//4 iron, 4 sulfur cluster binding//enzyme regulator activity	GO:0016020//GO:0005840//GO:0005622	membrane//ribosome//intracellular
Cluster-242496.83422	--	--	--	--	--	--	--	--	--	--	--	--	--	--	--	--
Cluster-242496.108001	--	--	--	--	--	--	--	--	PF05933	Fungal ATP synthase protein 8 (A6L)	GO:0015986//GO:0015992	ATP synthesis coupled proton transport//proton transport	GO:0015078	hydrogen ion transmembrane transporter activity	GO:0000276	mitochondrial proton-transporting ATP synthase complex, coupling factor F(o)
Cluster-242496.83162	--	--	--	--	Q6BDA0	1387	2.70E-151	Probable lysine-specific demethylase ELF6 OS=Arabidopsis thaliana GN=ELF6 PE=1 SV=1	PF00096//PF02822//PF13465	Zinc finger, C2H2 type//Antistasin family//Zinc-finger double domain	--	--	GO:0046872//GO:0004867	metal ion binding//serine-type endopeptidase inhibitor activity	--	--
Cluster-242496.104333	--	--	--	--	B8XCH5	2442	7.40E-274	Protein QUIRKY OS=Arabidopsis thaliana GN=QKY PE=2 SV=1	PF00168	C2 domain	--	--	GO:0005515	protein binding	--	--
Cluster-242496.93599	--	--	--	--	--	--	--	--	--	--	--	--	--	--	--	--
Cluster-242496.79670	--	--	--	--	--	--	--	--	--	--	--	--	--	--	--	--
Cluster-242496.106365	K13447	RBOH	respiratory burst oxidase	http://www.genome.jp/dbget-bin/www_bget?ko:K13447	Q948U0	2736	7.90E-308	Respiratory burst oxidase homolog protein A OS=Solanum tuberosum GN=RBOHA PE=1 SV=1	PF13405//PF13499//PF08030//PF13202//PF08414//PF00033//PF08022//PF00036//PF13833	EF-hand domain//EF-hand domain pair//Ferric reductase NAD binding domain//EF hand//Respiratory burst NADPH oxidase//Cytochrome b/b6/petB//FAD-binding domain//EF hand//EF-hand domain pair	GO:0006979//GO:0022904//GO:0055114//GO:0006804	response to oxidative stress//respiratory electron transport chain//oxidation-reduction process//obsolete peroxidase reaction	GO:0005509//GO:0004601//GO:0050664//GO:0016491	calcium ion binding//peroxidase activity//oxidoreductase activity, acting on NAD(P)H, oxygen as acceptor//oxidoreductase activity	GO:0016020	membrane
Cluster-242496.106600	K14314	NUP210, GP210	nuclear pore complex protein Nup210	http://www.genome.jp/dbget-bin/www_bget?ko:K14314	F4KHD8	4019	0.00E+00	Nuclear pore complex protein GP210 OS=Arabidopsis thaliana GN=GB210 PE=1 SV=1	PF15494//PF00831	Scavenger receptor cysteine-rich domain//Ribosomal L29 protein	GO:0042254//GO:0006412	ribosome biogenesis//translation	GO:0003735	structural constituent of ribosome	GO:0005840//GO:0016020//GO:0005622	ribosome//membrane//intracellular
Cluster-242496.117032	K12309	GLB1, ELNR1	beta-galactosidase	http://www.genome.jp/dbget-bin/www_bget?ko:K12309	Q93Z24	1604	8.50E-177	Beta-galactosidase 17 OS=Arabidopsis thaliana GN=BGAL17 PE=2 SV=1	PF02449//PF13185	Beta-galactosidase//GAF domain	GO:0006027//GO:0006687//GO:0046486//GO:0006012//GO:0005975	glycosaminoglycan catabolic process//glycosphingolipid metabolic process//glycerolipid metabolic process//galactose metabolic process//carbohydrate metabolic process	GO:0004565//GO:0005515	beta-galactosidase activity//protein binding	GO:0009341	beta-galactosidase complex
Cluster-242496.112196	--	--	--	--	--	--	--	--	PF00240	Ubiquitin family	--	--	GO:0005515	protein binding	--	--
Cluster-242496.103431	K16547	NEDD1	protein NEDD1	http://www.genome.jp/dbget-bin/www_bget?ko:K16547	B3H5K9	1364	9.50E-149	Protein NEDD1 OS=Arabidopsis thaliana GN=NEDD1 PE=2 SV=1	PF06105//PF00400	Aph-1 protein//WD domain, G-beta repeat	GO:0016485//GO:0043085	protein processing//positive regulation of catalytic activity	GO:0005515	protein binding	GO:0016021	integral component of membrane
Cluster-242496.112665	--	--	--	--	--	--	--	--	PF00013//PF13014	KH domain//KH domain	--	--	GO:0003723	RNA binding	--	--
Cluster-242496.91743	--	--	--	--	--	--	--	--	--	--	--	--	--	--	--	--
Cluster-242496.124072	--	--	--	--	Q9LXA5	1040	1.20E-111	L-type lectin-domain containing receptor kinase IX.1 OS=Arabidopsis thaliana GN=LECRK91 PE=2 SV=1	PF11421//PF06624//PF07714//PF00069//PF00139	ATP synthase F1 beta subunit//Ribosome associated membrane protein RAMP4//Protein tyrosine kinase//Protein kinase domain//Legume lectin domain	GO:0006754//GO:0006468	ATP biosynthetic process//protein phosphorylation	GO:0030246//GO:0005524//GO:0004672//GO:0016887	carbohydrate binding//ATP binding//protein kinase activity//ATPase activity	GO:0000275//GO:0005783	mitochondrial proton-transporting ATP synthase complex, catalytic core F(1)//endoplasmic reticulum
Cluster-242496.90323	K10393	KIF2_24, MCAK	kinesin family member 2/24	http://www.genome.jp/dbget-bin/www_bget?ko:K10393	Q940B8	2217	7.40E-248	Kinesin-13A OS=Arabidopsis thaliana GN=KINESIN-13A PE=1 SV=1	PF00225	Kinesin motor domain	GO:0007017//GO:0007018	microtubule-based process//microtubule-based movement	GO:0005524//GO:0003777//GO:0008017	ATP binding//microtubule motor activity//microtubule binding	GO:0045298//GO:0005874	tubulin complex//microtubule
Cluster-242496.79819	--	--	--	--	Q9CAC1	1640	3.30E-181	Endoglucanase 8 OS=Arabidopsis thaliana GN=CEL1 PE=2 SV=1	PF00759	Glycosyl hydrolase family 9	GO:0005975	carbohydrate metabolic process	GO:0004553	hydrolase activity, hydrolyzing O-glycosyl compounds	--	--
Cluster-242496.76847	--	--	--	--	Q9LFD5	146	4.30E-08	Binding partner of ACD11 1 OS=Arabidopsis thaliana GN=BPA1 PE=1 SV=1	PF16320	Ribosomal protein L7/L12 dimerisation domain	GO:0042254//GO:0006412	ribosome biogenesis//translation	GO:0003735	structural constituent of ribosome	GO:0005622//GO:0005840	intracellular//ribosome
Cluster-242496.79271	K11271	DSCC1, DCC1	sister chromatid cohesion protein DCC1	http://www.genome.jp/dbget-bin/www_bget?ko:K11271	Q66I84	392	1.50E-36	Sister chromatid cohesion protein DCC1 OS=Danio rerio GN=dscc1 PE=2 SV=1	PF07109	Magnesium-protoporphyrin IX methyltransferase C-terminus	GO:0015995//GO:0015994	chlorophyll biosynthetic process//chlorophyll metabolic process	GO:0046406	magnesium protoporphyrin IX methyltransferase activity	--	--
Cluster-242496.107135	K00784	rnz	ribonuclease Z	http://www.genome.jp/dbget-bin/www_bget?ko:K00784	B1XN66	211	1.50E-15	Ribonuclease Z OS=Synechococcus sp. (strain ATCC 27264 / PCC 7002 / PR-6) GN=rnz PE=3 SV=1	PF13691	tRNase Z endonuclease	GO:0008033	tRNA processing	--	--	--	--
Cluster-242496.89391	--	--	--	--	O82500	362	2.20E-33	Putative disease resistance protein At4g11170 OS=Arabidopsis thaliana GN=At4g11170 PE=2 SV=1	PF00931//PF08477//PF00005//PF00004//PF01637	NB-ARC domain//Ras of Complex, Roc, domain of DAPkinase//ABC transporter//ATPase family associated with various cellular activities (AAA)//Archaeal ATPase	GO:0007264	small GTPase mediated signal transduction	GO:0005524//GO:0016887//GO:0043531//GO:0005525	ATP binding//ATPase activity//ADP binding//GTP binding	--	--
Cluster-242496.88268	K11855	USP36_42	ubiquitin carboxyl-terminal hydrolase 36/42	http://www.genome.jp/dbget-bin/www_bget?ko:K11855	Q9FPS9	1141	4.80E-123	Ubiquitin carboxyl-terminal hydrolase 15 OS=Arabidopsis thaliana GN=UBP15 PE=2 SV=2	PF00443	Ubiquitin carboxyl-terminal hydrolase	GO:0016579	protein deubiquitination	GO:0036459	ubiquitinyl hydrolase activity	--	--
Cluster-242496.89067	K13216	PPP1R8, NIPP1	nuclear inhibitor of protein phosphatase 1	http://www.genome.jp/dbget-bin/www_bget?ko:K13216	Q12972	234	6.70E-18	Nuclear inhibitor of protein phosphatase 1 OS=Homo sapiens GN=PPP1R8 PE=1 SV=2	PF00498	FHA domain	--	--	GO:0005515	protein binding	--	--
Cluster-242496.122296	K11270	CTF8	chromosome transmission fidelity protein 8	http://www.genome.jp/dbget-bin/www_bget?ko:K11270	--	--	--	--	--	--	--	--	--	--	--	--
Cluster-242496.103698	--	--	--	--	Q8L6Y4	815	3.60E-85	Polycomb group protein EMBRYONIC FLOWER 2 OS=Arabidopsis thaliana GN=EMF2 PE=1 SV=2	--	--	--	--	--	--	--	--
Cluster-242496.103358	--	--	--	--	O04249	1593	1.40E-175	Sugar transport protein 7 OS=Arabidopsis thaliana GN=STP7 PE=2 SV=1	PF00083//PF07690	Sugar (and other) transporter//Major Facilitator Superfamily	GO:0055085	transmembrane transport	GO:0022857	transmembrane transporter activity	GO:0016021	integral component of membrane
Cluster-242496.51327	--	--	--	--	--	--	--	--	--	--	--	--	--	--	--	--
Cluster-242496.55764	--	--	--	--	--	--	--	--	--	--	--	--	--	--	--	--
Cluster-242496.81293	--	--	--	--	--	--	--	--	--	--	--	--	--	--	--	--
Cluster-242496.94332	K03671	trxA	thioredoxin 1	http://www.genome.jp/dbget-bin/www_bget?ko:K03671	O65049	195	9.80E-14	Thioredoxin H-type OS=Picea mariana GN=SB09 PE=2 SV=1	--	--	--	--	--	--	--	--
Cluster-242496.114622	--	--	--	--	--	--	--	--	--	--	--	--	--	--	--	--
Cluster-242496.85592	--	--	--	--	P0AD13	174	3.40E-11	Protein YeeZ OS=Escherichia coli O157:H7 GN=yeeZ PE=3 SV=1	PF03446//PF01370//PF02254//PF14641//PF00107//PF02826	NAD binding domain of 6-phosphogluconate dehydrogenase//NAD dependent epimerase/dehydratase family//TrkA-N domain//Helix-turn-helix DNA-binding domain of SPT6//Zinc-binding dehydrogenase//D-isomer specific 2-hydroxyacid dehydrogenase, NAD binding domain	GO:0019521//GO:0006098//GO:0006813//GO:0055114	D-gluconate metabolic process//pentose-phosphate shunt//potassium ion transport//oxidation-reduction process	GO:0051287//GO:0003677//GO:0050662//GO:0004616//GO:0003824	NAD binding//DNA binding//coenzyme binding//phosphogluconate dehydrogenase (decarboxylating) activity//catalytic activity	--	--
Cluster-242496.101834	K00434	E1.11.1.11	L-ascorbate peroxidase	http://www.genome.jp/dbget-bin/www_bget?ko:K00434	Q1PER6	973	2.80E-103	L-ascorbate peroxidase 2, cytosolic OS=Arabidopsis thaliana GN=APX2 PE=2 SV=3	PF01277//PF00141	Oleosin//Peroxidase	GO:0055114//GO:0006979//GO:0006804	oxidation-reduction process//response to oxidative stress//obsolete peroxidase reaction	GO:0004601//GO:0020037	peroxidase activity//heme binding	GO:0016021//GO:0012511	integral component of membrane//monolayer-surrounded lipid storage body
Cluster-242496.111157	K14664	ILR1	IAA-amino acid hydrolase	http://www.genome.jp/dbget-bin/www_bget?ko:K14664	Q8H3C8	1155	7.10E-125	IAA-amino acid hydrolase ILR1-like 8 OS=Oryza sativa subsp. japonica GN=ILL8 PE=2 SV=1	PF01546	Peptidase family M20/M25/M40	GO:0008152	metabolic process	GO:0016787	hydrolase activity	--	--
Cluster-242496.130996	--	--	--	--	Q94AI1	474	9.80E-46	QWRF motif-containing protein 2 OS=Arabidopsis thaliana GN=QWRF2 PE=2 SV=1	PF04272	Phospholamban	GO:0006816//GO:0006810	calcium ion transport//transport	GO:0005246//GO:0042030	calcium channel regulator activity//ATPase inhibitor activity	GO:0016020	membrane
Cluster-242496.108939	K00940	ndk, NME	nucleoside-diphosphate kinase	http://www.genome.jp/dbget-bin/www_bget?ko:K00940	O49203	254	2.80E-20	Nucleoside diphosphate kinase III, chloroplastic/mitochondrial OS=Arabidopsis thaliana GN=NDPK3 PE=1 SV=1	PF01701//PF13103//PF00334	Photosystem I reaction centre subunit IX / PsaJ//TonB C terminal//Nucleoside diphosphate kinase	GO:0006241//GO:0006810//GO:0015979//GO:0006206//GO:0006183//GO:0006228//GO:0006144//GO:0006165	CTP biosynthetic process//transport//photosynthesis//pyrimidine nucleobase metabolic process//GTP biosynthetic process//UTP biosynthetic process//purine nucleobase metabolic process//nucleoside diphosphate phosphorylation	GO:0004550	nucleoside diphosphate kinase activity	GO:0009522	photosystem I
Cluster-242496.78849	--	--	--	--	--	--	--	--	PF06371	Diaphanous GTPase-binding Domain	GO:0030036	actin cytoskeleton organization	GO:0003779//GO:0017048	actin binding//Rho GTPase binding	--	--
Cluster-242496.117393	--	--	--	--	Q8GUN5	388	5.50E-36	Protein PHR1-LIKE 1 OS=Arabidopsis thaliana GN=PHL1 PE=1 SV=1	--	--	--	--	--	--	--	--
Cluster-242496.109804	K01426	E3.5.1.4, amiE	amidase	http://www.genome.jp/dbget-bin/www_bget?ko:K01426	--	--	--	--	PF01282	Ribosomal protein S24e	GO:0042254//GO:0006412	ribosome biogenesis//translation	GO:0003735	structural constituent of ribosome	GO:0005622//GO:0005840	intracellular//ribosome
Cluster-242496.95561	--	--	--	--	--	--	--	--	--	--	--	--	--	--	--	--
Cluster-242496.125270	--	--	--	--	--	--	--	--	PF01764//PF00975	Lipase (class 3)//Thioesterase domain	GO:0009058//GO:0006629	biosynthetic process//lipid metabolic process	GO:0016788	hydrolase activity, acting on ester bonds	--	--
Cluster-242496.84580	--	--	--	--	O66878	139	4.60E-07	Chromosome partition protein Smc OS=Aquifex aeolicus (strain VF5) GN=smc PE=3 SV=1	PF03604	DNA directed RNA polymerase, 7 kDa subunit	GO:0006351//GO:0006144//GO:0006206	transcription, DNA-templated//purine nucleobase metabolic process//pyrimidine nucleobase metabolic process	GO:0003677//GO:0003899	DNA binding//DNA-directed RNA polymerase activity	GO:0005730	nucleolus
Cluster-242496.79130	K02258	COX11	cytochrome c oxidase assembly protein subunit 11	http://www.genome.jp/dbget-bin/www_bget?ko:K02258	Q8GWR0	562	4.80E-56	Cytochrome c oxidase assembly protein COX11, mitochondrial OS=Arabidopsis thaliana GN=COX11 PE=2 SV=1	PF01165//PF04442	Ribosomal protein S21//Cytochrome c oxidase assembly protein CtaG/Cox11	GO:0006412//GO:0042254	translation//ribosome biogenesis	GO:0005507//GO:0003735	copper ion binding//structural constituent of ribosome	GO:0005840	ribosome
Cluster-242496.88274	K14785	ESF2, ABT1	ESF2/ABP1 family protein	http://www.genome.jp/dbget-bin/www_bget?ko:K14785	Q7S8W7	198	7.40E-14	Pre-rRNA-processing protein esf-2 OS=Neurospora crassa (strain ATCC 24698 / 74-OR23-1A / CBS 708.71 / DSM 1257 / FGSC 987) GN=esf-2 PE=3 SV=1	--	--	--	--	--	--	--	--
Cluster-242496.83955	--	--	--	--	Q9SIT7	1123	5.40E-121	Pentatricopeptide repeat-containing protein At2g13600 OS=Arabidopsis thaliana GN=PCMP-E76 PE=3 SV=1	PF07284//PF08127//PF05853	2-vinyl bacteriochlorophyllide hydratase (BCHF)//Peptidase family C1 propeptide//3-keto-5-aminohexanoate cleavage enzyme	GO:0006508//GO:0050790//GO:0019685//GO:0019475//GO:0030494	proteolysis//regulation of catalytic activity//photosynthesis, dark reaction//L-lysine catabolic process to acetate//bacteriochlorophyll biosynthetic process	GO:0004197//GO:0016740//GO:0016836	cysteine-type endopeptidase activity//transferase activity//hydro-lyase activity	--	--
Cluster-242496.103088	--	--	--	--	O49607	1381	6.40E-151	Subtilisin-like protease SBT1.6 OS=Arabidopsis thaliana GN=SBT1.6 PE=2 SV=1	PF07578//PF00082	Lipid A Biosynthesis N-terminal domain//Subtilase family	GO:0006508//GO:0009245	proteolysis//lipid A biosynthetic process	GO:0004252//GO:0008915	serine-type endopeptidase activity//lipid-A-disaccharide synthase activity	--	--
Cluster-242496.100338	--	--	--	--	--	--	--	--	PF08073//PF00076	CHDNT (NUC034) domain//RNA recognition motif. (a.k.a. RRM, RBD, or RNP domain)	GO:0006355	regulation of transcription, DNA-templated	GO:0003676//GO:0016818//GO:0008270//GO:0003677//GO:0005524	nucleic acid binding//hydrolase activity, acting on acid anhydrides, in phosphorus-containing anhydrides//zinc ion binding//DNA binding//ATP binding	GO:0005634	nucleus
Cluster-242496.107687	K08991	MUS81	crossover junction endonuclease MUS81	http://www.genome.jp/dbget-bin/www_bget?ko:K08991	Q5W9E7	1308	1.70E-142	Crossover junction endonuclease MUS81 OS=Arabidopsis thaliana GN=MUS81 PE=1 SV=1	PF02732	ERCC4 domain	--	--	GO:0003677//GO:0004518	DNA binding//nuclease activity	--	--
Cluster-242496.85734	--	--	--	--	--	--	--	--	PF00686	Starch binding domain	--	--	GO:2001070	starch binding	--	--
Cluster-242496.96430	K06962	K06962	uncharacterized protein	http://www.genome.jp/dbget-bin/www_bget?ko:K06962	--	--	--	--	--	--	--	--	--	--	--	--
Cluster-242496.98862	K01728	pel	pectate lyase	http://www.genome.jp/dbget-bin/www_bget?ko:K01728	Q93WF1	842	3.50E-88	Probable pectate lyase 20 OS=Arabidopsis thaliana GN=At5g48900 PE=2 SV=1	PF10798	Biofilm development protein YmgB/AriR	GO:0042710//GO:0071229	biofilm formation//cellular response to acid chemical	--	--	--	--
Cluster-242496.82212	--	--	--	--	--	--	--	--	--	--	--	--	--	--	--	--
Cluster-242496.88546	--	--	--	--	O76329	187	1.50E-12	Interaptin OS=Dictyostelium discoideum GN=abpD PE=1 SV=1	PF06156//PF04977//PF00170//PF11266//PF06005//PF00038//PF09177	Protein of unknown function (DUF972)//Septum formation initiator//bZIP transcription factor//Protein of unknown function (DUF3066)//Protein of unknown function (DUF904)//Intermediate filament protein//Syntaxin 6, N-terminal	GO:0048193//GO:0043093//GO:0006355//GO:0006260//GO:0000917//GO:0007049	Golgi vesicle transport//FtsZ-dependent cytokinesis//regulation of transcription, DNA-templated//DNA replication//barrier septum assembly//cell cycle	GO:0003700//GO:0071771//GO:0005198//GO:0043565	transcription factor activity, sequence-specific DNA binding//aldehyde decarbonylase activity//structural molecule activity//sequence-specific DNA binding	GO:0005667//GO:0016020//GO:0005882//GO:0005737	transcription factor complex//membrane//intermediate filament//cytoplasm
Cluster-242496.81046	K01551	arsA, ASNA1	arsenite-transporting ATPase	http://www.genome.jp/dbget-bin/www_bget?ko:K01551	Q6DYE4	414	7.50E-39	Uncharacterized protein At1g26090, chloroplastic OS=Arabidopsis thaliana GN=At1g26090 PE=2 SV=1	PF04636	PA26 p53-induced protein (sestrin)	GO:1901031	regulation of response to reactive oxygen species	--	--	GO:0005634	nucleus
Cluster-242496.117743	K00850	pfkA, PFK	6-phosphofructokinase 1	http://www.genome.jp/dbget-bin/www_bget?ko:K00850	Q8VYN6	1199	1.00E-129	ATP-dependent 6-phosphofructokinase 5, chloroplastic OS=Arabidopsis thaliana GN=PFK5 PE=1 SV=1	PF00365//PF08107//PF03688	Phosphofructokinase//Pleurocidin family//Nepovirus coat protein, C-terminal domain	GO:0006094//GO:0006000//GO:0006012//GO:0006096//GO:0006098//GO:0006013//GO:0042742	gluconeogenesis//fructose metabolic process//galactose metabolic process//glycolytic process//pentose-phosphate shunt//mannose metabolic process//defense response to bacterium	GO:0003872	6-phosphofructokinase activity	GO:0019028//GO:0005945	viral capsid//6-phosphofructokinase complex
Cluster-242496.108532	--	--	--	--	Q7Y211	139	2.20E-07	Pentatricopeptide repeat-containing protein At3g57430, chloroplastic OS=Arabidopsis thaliana GN=PCMP-H81 PE=2 SV=2	--	--	--	--	--	--	--	--
Cluster-242496.92666	--	--	--	--	B2RXC1	471	3.70E-45	Trafficking protein particle complex subunit 11 OS=Mus musculus GN=Trappc11 PE=2 SV=1	PF13374//PF03099//PF03842	Tetratricopeptide repeat//Biotin/lipoate A/B protein ligase family//Silicon transporter	GO:0006464//GO:0015708	cellular protein modification process//silicate transport	GO:0005515	protein binding	--	--
Cluster-242496.104565	--	--	--	--	Q9FJH0	126	9.10E-06	Ras-related protein RABA1f OS=Arabidopsis thaliana GN=RABA1F PE=2 SV=1	--	--	--	--	--	--	--	--
Cluster-242496.111880	--	--	--	--	--	--	--	--	--	--	--	--	--	--	--	--
Cluster-242496.93522	--	--	--	--	Q8W4G3	1230	1.70E-133	MATE efflux family protein 4, chloroplastic OS=Arabidopsis thaliana GN=DTX46 PE=2 SV=1	PF01554	MatE	GO:0006855//GO:0055085//GO:0015893//GO:0006810	drug transmembrane transport//transmembrane transport//drug transport//transport	GO:0015297//GO:0015238	antiporter activity//drug transmembrane transporter activity	GO:0016020	membrane
Cluster-242496.93052	K02259	COX15	cytochrome c oxidase assembly protein subunit 15	http://www.genome.jp/dbget-bin/www_bget?ko:K02259	Q9FKT8	1441	5.00E-158	Cytochrome c oxidase assembly protein COX15 OS=Arabidopsis thaliana GN=COX15 PE=2 SV=1	PF02628	Cytochrome oxidase assembly protein	GO:0006784//GO:0055114	heme a biosynthetic process//oxidation-reduction process	GO:0016627	oxidoreductase activity, acting on the CH-CH group of donors	GO:0016021	integral component of membrane
Cluster-242496.87122	--	--	--	--	Q9LYN8	3102	0.00E+00	Leucine-rich repeat receptor protein kinase EMS1 OS=Arabidopsis thaliana GN=EMS1 PE=1 SV=1	PF13855//PF00069//PF07714//PF00560	Leucine rich repeat//Protein kinase domain//Protein tyrosine kinase//Leucine Rich Repeat	GO:0006468	protein phosphorylation	GO:0005515//GO:0004672//GO:0005524	protein binding//protein kinase activity//ATP binding	--	--
Cluster-242496.109668	--	--	--	--	--	--	--	--	PF03279//PF03811//PF07578	Bacterial lipid A biosynthesis acyltransferase//InsA N-terminal domain//Lipid A Biosynthesis N-terminal domain	GO:0009245//GO:0006313	lipid A biosynthetic process//transposition, DNA-mediated	GO:0016740//GO:0008915	transferase activity//lipid-A-disaccharide synthase activity	GO:0016021	integral component of membrane
Cluster-242496.86298	--	--	--	--	--	--	--	--	PF00287	Sodium / potassium ATPase beta chain	GO:0006814//GO:0006813	sodium ion transport//potassium ion transport	--	--	GO:0005890	sodium:potassium-exchanging ATPase complex
Cluster-242496.56457	--	--	--	--	--	--	--	--	--	--	--	--	--	--	--	--
Cluster-242496.86922	--	--	--	--	--	--	--	--	--	--	--	--	--	--	--	--
Cluster-242496.86686	--	--	--	--	--	--	--	--	PF16692	Folliculin C-terminal domain	GO:0043087	regulation of GTPase activity	GO:0005085	guanyl-nucleotide exchange factor activity	--	--
Cluster-242496.105672	--	--	--	--	Q66GS2	1052	7.20E-113	Probable beta-1,3-galactosyltransferase 12 OS=Arabidopsis thaliana GN=B3GALT12 PE=2 SV=1	PF02434//PF01762	Fringe-like//Galactosyltransferase	GO:0006486	protein glycosylation	GO:0016757//GO:0008378	transferase activity, transferring glycosyl groups//galactosyltransferase activity	GO:0016020	membrane
Cluster-242496.87781	--	--	--	--	--	--	--	--	--	--	--	--	--	--	--	--
Cluster-242496.86832	K03678	RRP45, EXOSC9	exosome complex component RRP45	http://www.genome.jp/dbget-bin/www_bget?ko:K03678	Q9M209	1005	2.20E-107	Protein ECERIFERUM 7 OS=Arabidopsis thaliana GN=CER7 PE=2 SV=1	PF00301//PF00734	Rubredoxin//Fungal cellulose binding domain	GO:0005975	carbohydrate metabolic process	GO:0005506//GO:0004553//GO:0030248	iron ion binding//hydrolase activity, hydrolyzing O-glycosyl compounds//cellulose binding	GO:0005576	extracellular region
Cluster-242496.61875	K02321	POLA2	DNA polymerase alpha subunit B	http://www.genome.jp/dbget-bin/www_bget?ko:K02321	Q14181	563	4.40E-56	DNA polymerase alpha subunit B OS=Homo sapiens GN=POLA2 PE=1 SV=2	PF04042	DNA polymerase alpha/epsilon subunit B	GO:0006260	DNA replication	GO:0003677//GO:0003887	DNA binding//DNA-directed DNA polymerase activity	GO:0042575	DNA polymerase complex
Cluster-242496.116363	--	--	--	--	Q40392	462	3.20E-44	TMV resistance protein N OS=Nicotiana glutinosa GN=N PE=1 SV=1	PF05184//PF13676//PF01637//PF01443//PF00006//PF08477//PF00931//PF00004//PF01926//PF00005//PF01582	Saposin-like type B, region 1//TIR domain//Archaeal ATPase//Viral (Superfamily 1) RNA helicase//ATP synthase alpha/beta family, nucleotide-binding domain//Ras of Complex, Roc, domain of DAPkinase//NB-ARC domain//ATPase family associated with various cellular activities (AAA)//50S ribosome-binding GTPase//ABC transporter//TIR domain	GO:0007165//GO:0007264//GO:0006629	signal transduction//small GTPase mediated signal transduction//lipid metabolic process	GO:0005525//GO:0043531//GO:0016887//GO:0005524//GO:0005515	GTP binding//ADP binding//ATPase activity//ATP binding//protein binding	--	--
Cluster-242496.92176	--	--	--	--	--	--	--	--	--	--	--	--	--	--	--	--
Cluster-242496.110972	--	--	--	--	Q6DBG8	1222	1.40E-132	Probable arabinosyltransferase ARAD1 OS=Arabidopsis thaliana GN=ARAD1 PE=1 SV=1	PF05923	APC cysteine-rich region	GO:0016055	Wnt signaling pathway	--	--	--	--
Cluster-242496.109469	--	--	--	--	--	--	--	--	--	--	--	--	--	--	--	--
Cluster-242496.111721	--	--	--	--	Q8BHT6	139	6.30E-07	Beta-1,3-glucosyltransferase OS=Mus musculus GN=B3galtl PE=2 SV=3	PF02118//PF02434	Srg family chemoreceptor//Fringe-like	GO:0007165//GO:0007606	signal transduction//sensory perception of chemical stimulus	GO:0004888//GO:0016757	transmembrane signaling receptor activity//transferase activity, transferring glycosyl groups	GO:0016020	membrane
Cluster-242496.113509	K01069	E3.1.2.6, gloB	hydroxyacylglutathione hydrolase	http://www.genome.jp/dbget-bin/www_bget?ko:K01069	O24496	421	9.30E-40	Hydroxyacylglutathione hydrolase cytoplasmic OS=Arabidopsis thaliana GN=GLX2-2 PE=1 SV=2	--	--	--	--	--	--	--	--
Cluster-242496.103700	--	--	--	--	Q9SUK9	1054	8.10E-113	Probable protein phosphatase 2C 55 OS=Arabidopsis thaliana GN=At4g16580 PE=2 SV=2	PF10104//PF07228//PF00481	Di-sulfide bridge nucleocytoplasmic transport domain//Stage II sporulation protein E (SpoIIE)//Protein phosphatase 2C	GO:0006998//GO:0006406//GO:0006611	nuclear envelope organization//mRNA export from nucleus//protein export from nucleus	GO:0003824	catalytic activity	GO:0031965	nuclear membrane
Cluster-242496.104214	K19026	SPG11	spatacsin	http://www.genome.jp/dbget-bin/www_bget?ko:K19026	Q55GD2	296	1.50E-24	Protein DDB_G0268328 OS=Dictyostelium discoideum GN=DDB_G0268328 PE=4 SV=1	PF02236	Viral DNA-binding protein, all alpha domain	GO:0006260//GO:0006351	DNA replication//transcription, DNA-templated	GO:0003677	DNA binding	GO:0042025	host cell nucleus
Cluster-242496.120384	K01188	E3.2.1.21	beta-glucosidase	http://www.genome.jp/dbget-bin/www_bget?ko:K01188	Q9ZT64	569	8.00E-57	Coniferin beta-glucosidase OS=Pinus contorta PE=1 SV=1	PF00232	Glycosyl hydrolase family 1	GO:0005975	carbohydrate metabolic process	GO:0004553	hydrolase activity, hydrolyzing O-glycosyl compounds	--	--
Cluster-242496.101765	--	--	--	--	O95714	295	5.60E-25	E3 ubiquitin-protein ligase HERC2 OS=Homo sapiens GN=HERC2 PE=1 SV=2	PF12937//PF02267	F-box-like//ADP-ribosyl cyclase	GO:0006769//GO:0046497	nicotinamide metabolic process//nicotinate nucleotide metabolic process	GO:0005515//GO:0003953	protein binding//NAD+ nucleosidase activity	--	--
Cluster-242496.84378	K12900	FUSIP1	FUS-interacting serine-arginine-rich protein 1	http://www.genome.jp/dbget-bin/www_bget?ko:K12900	Q1PDV2	329	6.10E-29	Serine/arginine-rich SC35-like splicing factor SCL28 OS=Arabidopsis thaliana GN=SCL28 PE=1 SV=1	PF00711//PF00076	Beta defensin//RNA recognition motif. (a.k.a. RRM, RBD, or RNP domain)	GO:0006952	defense response	GO:0003676	nucleic acid binding	GO:0005576	extracellular region
Cluster-242496.110584	K03596	lepA	GTP-binding protein LepA	http://www.genome.jp/dbget-bin/www_bget?ko:K03596	B9RUN8	2536	7.70E-285	Translation factor GUF1 homolog, mitochondrial OS=Ricinus communis GN=RCOM_0855130 PE=3 SV=1	PF03144//PF00071//PF01926	Elongation factor Tu domain 2//Ras family//50S ribosome-binding GTPase	GO:0007264	small GTPase mediated signal transduction	GO:0005525	GTP binding	--	--
Cluster-242496.99926	--	--	--	--	A6H619	136	3.70E-06	PHD and RING finger domain-containing protein 1 OS=Mus musculus GN=Phrf1 PE=2 SV=2	PF00628//PF00220//PF02151//PF02742//PF03709//PF00098	PHD-finger//Neurohypophysial hormones, N-terminal Domain//UvrB/uvrC motif//Iron dependent repressor, metal binding and dimerisation domain//Orn/Lys/Arg decarboxylase, N-terminal domain//Zinc knuckle	GO:0007218	neuropeptide signaling pathway	GO:0016831//GO:0003676//GO:0046914//GO:0008270//GO:0046983//GO:0005185//GO:0005515	carboxy-lyase activity//nucleic acid binding//transition metal ion binding//zinc ion binding//protein dimerization activity//neurohypophyseal hormone activity//protein binding	GO:0005576	extracellular region
Cluster-242496.88880	--	--	--	--	--	--	--	--	PF01699	Sodium/calcium exchanger protein	GO:0055085	transmembrane transport	--	--	GO:0016021	integral component of membrane
Cluster-242496.85941	--	--	--	--	Q9LYZ9	329	6.70E-29	Pentatricopeptide repeat-containing protein At5g02860 OS=Arabidopsis thaliana GN=At5g02860 PE=2 SV=1	PF00637//PF08069	Region in Clathrin and VPS//Ribosomal S13/S15 N-terminal domain	GO:0042254//GO:0006412//GO:0006886//GO:0016192	ribosome biogenesis//translation//intracellular protein transport//vesicle-mediated transport	GO:0003735	structural constituent of ribosome	GO:0005840	ribosome
Cluster-242496.126657	K10277	KDM8, JMJD5	lysine-specific demethylase 8	http://www.genome.jp/dbget-bin/www_bget?ko:K10277	Q8RWR1	925	3.40E-98	Putative lysine-specific demethylase JMJD5 OS=Arabidopsis thaliana GN=JMJD5 PE=2 SV=1	--	--	--	--	--	--	--	--
Cluster-242496.85828	--	--	--	--	--	--	--	--	PF01266	FAD dependent oxidoreductase	GO:0055114	oxidation-reduction process	GO:0016491	oxidoreductase activity	--	--
Cluster-242496.124079	--	--	--	--	O49545	2681	1.30E-301	Leucine-rich repeat receptor-like serine/threonine-protein kinase BAM1 OS=Arabidopsis thaliana GN=BAM1 PE=1 SV=1	PF07714//PF00069//PF00560//PF13855	Protein tyrosine kinase//Protein kinase domain//Leucine Rich Repeat//Leucine rich repeat	GO:0006468	protein phosphorylation	GO:0005515//GO:0004672//GO:0005524	protein binding//protein kinase activity//ATP binding	--	--
Cluster-242496.80401	--	--	--	--	--	--	--	--	--	--	--	--	--	--	--	--
Cluster-242496.93661	--	--	--	--	--	--	--	--	--	--	--	--	--	--	--	--
Cluster-242496.118071	K15271	HFM1, MER3	ATP-dependent DNA helicase HFM1/MER3	http://www.genome.jp/dbget-bin/www_bget?ko:K15271	Q9SHZ8	1424	5.20E-156	Pentatricopeptide repeat-containing protein At2g22070 OS=Arabidopsis thaliana GN=PCMP-H41 PE=3 SV=1	PF00445	Ribonuclease T2 family	--	--	GO:0003723//GO:0033897	RNA binding//ribonuclease T2 activity	--	--
Cluster-242496.107721	--	--	--	--	O81908	1326	2.00E-144	Pentatricopeptide repeat-containing protein At1g02060, chloroplastic OS=Arabidopsis thaliana GN=At1g02060 PE=2 SV=2	PF00637	Region in Clathrin and VPS	GO:0016192//GO:0006886	vesicle-mediated transport//intracellular protein transport	--	--	--	--
Cluster-242496.77637	--	--	--	--	--	--	--	--	--	--	--	--	--	--	--	--
Cluster-242496.93615	--	--	--	--	Q16P87	208	7.60E-15	Molybdenum cofactor sulfurase 2 OS=Aedes aegypti GN=mal2 PE=3 SV=1	--	--	--	--	--	--	--	--
Cluster-242496.132667	--	--	--	--	G5E8K5	328	1.20E-28	Ankyrin-3 OS=Mus musculus GN=Ank3 PE=1 SV=1	PF00023//PF13606	Ankyrin repeat//Ankyrin repeat	--	--	GO:0005515	protein binding	--	--
Cluster-242496.93470	--	--	--	--	A1Y2B7	190	8.30E-13	Protein SUPPRESSOR OF GENE SILENCING 3 homolog OS=Zea mays GN=SGS3 PE=1 SV=1	PF13639//PF14634//PF03468//PF06736//PF00097	Ring finger domain//zinc-RING finger domain//XS domain//Protein of unknown function (DUF1211)//Zinc finger, C3HC4 type (RING finger)	GO:0006813//GO:0031047	potassium ion transport//gene silencing by RNA	GO:0046872//GO:0008270//GO:0005515//GO:0005267	metal ion binding//zinc ion binding//protein binding//potassium channel activity	--	--
Cluster-242496.92665	--	--	--	--	Q336N8	856	1.10E-89	Lysine-specific demethylase JMJ706 OS=Oryza sativa subsp. japonica GN=JMJ706 PE=2 SV=1	--	--	--	--	--	--	--	--
Cluster-242496.111881	--	--	--	--	--	--	--	--	PF00514//PF07825//PF00646	Armadillo/beta-catenin-like repeat//Excisionase-like protein//F-box domain	GO:0006310	DNA recombination	GO:0003677//GO:0005515	DNA binding//protein binding	--	--
Cluster-242496.91280	--	--	--	--	--	--	--	--	--	--	--	--	--	--	--	--
Cluster-242496.88146	K08176	PHO84	MFS transporter, PHS family, inorganic phosphate transporter	http://www.genome.jp/dbget-bin/www_bget?ko:K08176	O48639	287	7.60E-25	Probable inorganic phosphate transporter 1-3 OS=Arabidopsis thaliana GN=PHT1-3 PE=2 SV=1	--	--	--	--	--	--	--	--
Cluster-242496.103993	K05863	SLC25A4S, ANT	solute carrier family 25 (mitochondrial adenine nucleotide translocator), member 4/5/6/31	http://www.genome.jp/dbget-bin/www_bget?ko:K05863	Q9FM86	769	5.30E-80	Probable ADP,ATP carrier protein At5g56450 OS=Arabidopsis thaliana GN=At5g56450 PE=2 SV=1	PF05409//PF08802	Coronavirus endopeptidase C30//Cytochrome B6-F complex Fe-S subunit	GO:0006118//GO:0055114//GO:0019082	obsolete electron transport//oxidation-reduction process//viral protein processing	GO:0009496//GO:0051537	plastoquinol--plastocyanin reductase activity//2 iron, 2 sulfur cluster binding	GO:0042651//GO:0009512	thylakoid membrane//cytochrome b6f complex
Cluster-242496.103204	--	--	--	--	--	--	--	--	--	--	--	--	--	--	--	--
Cluster-242496.104820	K00142	AASDH	acyl-CoA synthetase	http://www.genome.jp/dbget-bin/www_bget?ko:K00142	F4K1G2	960	6.80E-102	Putative acyl-activating enzyme 19 OS=Arabidopsis thaliana GN=At5g35930 PE=2 SV=1	PF01349//PF00501//PF00367//PF01445	Flavivirus non-structural protein NS4B//AMP-binding enzyme//phosphotransferase system, EIIB//Viral small hydrophobic protein	GO:0009451//GO:0006370//GO:0008152//GO:0006396//GO:0006144//GO:0008643	RNA modification//7-methylguanosine mRNA capping//metabolic process//RNA processing//purine nucleobase metabolic process//carbohydrate transport	GO:0003824//GO:0003968//GO:0004252//GO:0017111//GO:0004482//GO:0016817//GO:0008982//GO:0004483//GO:0070008	catalytic activity//RNA-directed RNA polymerase activity//serine-type endopeptidase activity//nucleoside-triphosphatase activity//mRNA (guanine-N7-)-methyltransferase activity//hydrolase activity, acting on acid anhydrides//protein-N(PI)-phosphohistidine-sugar phosphotransferase activity//mRNA (nucleoside-2'-O-)-methyltransferase activity//serine-type exopeptidase activity	GO:0009357//GO:0031379//GO:0016020	protein-N(PI)-phosphohistidine-sugar phosphotransferase complex//RNA-directed RNA polymerase complex//membrane
Cluster-242496.96625	--	--	--	--	--	--	--	--	--	--	--	--	--	--	--	--
Cluster-242496.92219	--	--	--	--	Q9HSF6	141	4.20E-07	Ribonuclease HI OS=Halobacterium salinarum (strain ATCC 700922 / JCM 11081 / NRC-1) GN=rnhA PE=1 SV=1	--	--	--	--	--	--	--	--
Cluster-242496.102645	K11450	KDM1A, AOF2, LSD1	lysine-specific histone demethylase 1A	http://www.genome.jp/dbget-bin/www_bget?ko:K11450	Q01H90	2153	3.40E-240	Lysine-specific histone demethylase 1 homolog 3 OS=Oryza sativa subsp. indica GN=B0103C08-B0602B01.13 PE=3 SV=1	PF01623//PF07992//PF01134//PF00070//PF01266//PF01494//PF12831//PF01593//PF04433//PF05834//PF02826	Carlavirus putative nucleic acid binding protein//Pyridine nucleotide-disulphide oxidoreductase//Glucose inhibited division protein A//Pyridine nucleotide-disulphide oxidoreductase//FAD dependent oxidoreductase//FAD binding domain//FAD dependent oxidoreductase//Flavin containing amine oxidoreductase//SWIRM domain//Lycopene cyclase protein//D-isomer specific 2-hydroxyacid dehydrogenase, NAD bindin…	GO:0006355//GO:0055114//GO:0016117//GO:0008033	regulation of transcription, DNA-templated//oxidation-reduction process//carotenoid biosynthetic process//tRNA processing	GO:0005515//GO:0051287//GO:0003676//GO:0016705//GO:0050660//GO:0071949//GO:0016491	protein binding//NAD binding//nucleic acid binding//oxidoreductase activity, acting on paired donors, with incorporation or reduction of molecular oxygen//flavin adenine dinucleotide binding//FAD binding//oxidoreductase activity	--	--
Cluster-242496.90080	--	--	--	--	--	--	--	--	--	--	--	--	--	--	--	--
Cluster-242496.107190	--	--	--	--	--	--	--	--	PF00257	Dehydrin	GO:0006950//GO:0009415	response to stress//response to water	--	--	--	--
Cluster-242496.119843	--	--	--	--	--	--	--	--	--	--	--	--	--	--	--	--
Cluster-242496.117383	--	--	--	--	--	--	--	--	--	--	--	--	--	--	--	--
Cluster-242496.72295	--	--	--	--	--	--	--	--	PF04514	Bluetongue virus non-structural protein NS2	--	--	GO:0003723	RNA binding	--	--
Cluster-242496.90372	--	--	--	--	--	--	--	--	PF09360//PF02434	Iron-binding zinc finger CDGSH type//Fringe-like	--	--	GO:0051537//GO:0016757	2 iron, 2 sulfur cluster binding//transferase activity, transferring glycosyl groups	GO:0016020//GO:0043231	membrane//intracellular membrane-bounded organelle
Cluster-242496.78903	K04733	IRAK4	interleukin-1 receptor-associated kinase 4	http://www.genome.jp/dbget-bin/www_bget?ko:K04733	Q8GXZ3	444	5.60E-42	Serine/threonine-protein kinase At5g01020 OS=Arabidopsis thaliana GN=At5g01020 PE=1 SV=1	PF00796//PF05830//PF00069//PF07714	Photosystem I reaction centre subunit VIII//Nodulation protein Z (NodZ)//Protein kinase domain//Protein tyrosine kinase	GO:0009877//GO:0006468//GO:0015979//GO:0009312	nodulation//protein phosphorylation//photosynthesis//oligosaccharide biosynthetic process	GO:0004672//GO:0016758//GO:0005524	protein kinase activity//transferase activity, transferring hexosyl groups//ATP binding	GO:0009522	photosystem I
Cluster-242496.120102	--	--	--	--	Q8HXL3	645	2.50E-65	WD repeat-containing protein 62 OS=Sus scrofa GN=WDR62 PE=3 SV=1	PF00400//PF07569	WD domain, G-beta repeat//TUP1-like enhancer of split	GO:0006355	regulation of transcription, DNA-templated	GO:0005515	protein binding	GO:0005634	nucleus
Cluster-242496.82955	--	--	--	--	F4JS25	1758	1.80E-194	Suppressor of RPS4-RLD 1 OS=Arabidopsis thaliana GN=SRFR1 PE=1 SV=1	PF13176//PF13174//PF13414//PF00515//PF13181//PF13371//PF13374	Tetratricopeptide repeat//Tetratricopeptide repeat//TPR repeat//Tetratricopeptide repeat//Tetratricopeptide repeat//Tetratricopeptide repeat//Tetratricopeptide repeat	--	--	GO:0005515	protein binding	--	--
Cluster-242496.105249	--	--	--	--	P23799	180	9.10E-12	Putative adenylate cyclase regulatory protein OS=Trypanosoma brucei brucei GN=ESAG8 PE=2 SV=1	PF13855//PF01179	Leucine rich repeat//Copper amine oxidase, enzyme domain	GO:0055114//GO:0009308	oxidation-reduction process//amine metabolic process	GO:0048038//GO:0005507//GO:0008131//GO:0005515	quinone binding//copper ion binding//primary amine oxidase activity//protein binding	--	--
Cluster-242496.114506	K01206	FUCA	alpha-L-fucosidase	http://www.genome.jp/dbget-bin/www_bget?ko:K01206	Q8GW72	1242	7.40E-135	Alpha-L-fucosidase 1 OS=Arabidopsis thaliana GN=FUC1 PE=1 SV=2	PF01120//PF13855//PF00734	Alpha-L-fucosidase//Leucine rich repeat//Fungal cellulose binding domain	GO:0005975	carbohydrate metabolic process	GO:0005515//GO:0004560//GO:0004553//GO:0030248	protein binding//alpha-L-fucosidase activity//hydrolase activity, hydrolyzing O-glycosyl compounds//cellulose binding	GO:0005576	extracellular region
Cluster-242496.89691	--	--	--	--	--	--	--	--	--	--	--	--	--	--	--	--
Cluster-242496.130812	--	--	--	--	Q9M9C5	481	4.80E-47	Probable leucine-rich repeat receptor-like protein kinase At1g68400 OS=Arabidopsis thaliana GN=At1g68400 PE=2 SV=1	PF00069//PF07714	Protein kinase domain//Protein tyrosine kinase	GO:0006468	protein phosphorylation	GO:0005524//GO:0004672	ATP binding//protein kinase activity	--	--
Cluster-242496.77376	--	--	--	--	--	--	--	--	PF08082	PRO8NT (NUC069), PrP8 N-terminal domain	GO:0000398	mRNA splicing, via spliceosome	--	--	--	--
Cluster-242496.111498	--	--	--	--	--	--	--	--	PF05680	ATP synthase E chain	GO:0015992//GO:0015986	proton transport//ATP synthesis coupled proton transport	GO:0015078	hydrogen ion transmembrane transporter activity	GO:0000276	mitochondrial proton-transporting ATP synthase complex, coupling factor F(o)
Cluster-242496.103454	--	--	--	--	Q0WKY2	563	4.10E-56	Carbon catabolite repressor protein 4 homolog 5 OS=Arabidopsis thaliana GN=CCR4-5 PE=2 SV=2	PF08032//PF00366	RNA 2'-O ribose methyltransferase substrate binding//Ribosomal protein S17	GO:0042254//GO:0006412	ribosome biogenesis//translation	GO:0003735//GO:0008168	structural constituent of ribosome//methyltransferase activity	GO:0005622//GO:0005840	intracellular//ribosome
Cluster-242496.109523	K06642	PRKDC	DNA-dependent protein kinase catalytic subunit	http://www.genome.jp/dbget-bin/www_bget?ko:K06642	P78527	3401	0.00E+00	DNA-dependent protein kinase catalytic subunit OS=Homo sapiens GN=PRKDC PE=1 SV=3	PF08163//PF04124//PF00454//PF02260//PF02259	NUC194 domain//Dor1-like family//Phosphatidylinositol 3- and 4-kinase//FATC domain//FAT domain	GO:0009069//GO:0016310//GO:0006303	serine family amino acid metabolic process//phosphorylation//double-strand break repair via nonhomologous end joining	GO:0004677//GO:0005515//GO:0003677//GO:0005524//GO:0016773	DNA-dependent protein kinase activity//protein binding//DNA binding//ATP binding//phosphotransferase activity, alcohol group as acceptor	GO:0005958//GO:0017119//GO:0005634	DNA-dependent protein kinase-DNA ligase 4 complex//Golgi transport complex//nucleus
Cluster-242496.100300	--	--	--	--	Q9FE06	267	1.10E-21	Protein EXORDIUM-like 2 OS=Arabidopsis thaliana GN=EXL2 PE=2 SV=1	PF02179//PF00612	BAG domain//IQ calmodulin-binding motif	--	--	GO:0051087//GO:0005515	chaperone binding//protein binding	--	--
Cluster-242496.71764	--	--	--	--	O81973	1237	1.80E-134	Cytochrome P450 93A3 OS=Glycine max GN=CYP93A3 PE=2 SV=1	PF01445//PF00397//PF00067	Viral small hydrophobic protein//WW domain//Cytochrome P450	GO:0055114	oxidation-reduction process	GO:0005515//GO:0005506//GO:0020037//GO:0016705	protein binding//iron ion binding//heme binding//oxidoreductase activity, acting on paired donors, with incorporation or reduction of molecular oxygen	GO:0016020	membrane
Cluster-242496.94128	--	--	--	--	Q9LW63	388	1.30E-36	Putative pentatricopeptide repeat-containing protein At3g23330 OS=Arabidopsis thaliana GN=PCMP-H32 PE=3 SV=1	PF17049	ATPase expression protein 1	GO:0006417	regulation of translation	GO:0045182	translation regulator activity	--	--
Cluster-242496.106536	K16281	RHA1	RING-H2 zinc finger protein RHA1	http://www.genome.jp/dbget-bin/www_bget?ko:K16281	Q9SUS4	187	8.50E-13	RING-H2 zinc finger protein RHA1a OS=Arabidopsis thaliana GN=RHA1A PE=2 SV=1	PF04564//PF13639//PF12861//PF00097//PF12906//PF12678//PF14634//PF17123	U-box domain//Ring finger domain//Anaphase-promoting complex subunit 11 RING-H2 finger//Zinc finger, C3HC4 type (RING finger)//RING-variant domain//RING-H2 zinc finger//zinc-RING finger domain//RING-like zinc finger	GO:0016567	protein ubiquitination	GO:0005515//GO:0046872//GO:0004842//GO:0008270	protein binding//metal ion binding//ubiquitin-protein transferase activity//zinc ion binding	GO:0005680	anaphase-promoting complex
Cluster-242496.108429	--	--	--	--	Q54P70	250	5.70E-20	OTU domain-containing protein DDB_G0284757 OS=Dictyostelium discoideum GN=DDB_G0284757 PE=3 SV=2	PF04685	Protein of unknown function, DUF608	GO:0006687//GO:0006665//GO:0006807//GO:0005975	glycosphingolipid metabolic process//sphingolipid metabolic process//nitrogen compound metabolic process//carbohydrate metabolic process	GO:0004348	glucosylceramidase activity	GO:0016021	integral component of membrane
Cluster-242496.93647	--	--	--	--	Q9FE06	404	2.90E-38	Protein EXORDIUM-like 2 OS=Arabidopsis thaliana GN=EXL2 PE=2 SV=1	--	--	--	--	--	--	--	--
Cluster-242496.106248	--	--	--	--	--	--	--	--	PF00026	Eukaryotic aspartyl protease	GO:0006508	proteolysis	GO:0004190	aspartic-type endopeptidase activity	--	--
Cluster-242496.75469	--	--	--	--	Q9SIT6	1226	4.10E-133	ABC transporter G family member 5 OS=Arabidopsis thaliana GN=ABCG5 PE=2 SV=1	PF06414//PF13304//PF00005//PF02224//PF00910//PF00770//PF01061//PF03193	Zeta toxin//AAA domain, putative AbiEii toxin, Type IV TA system//ABC transporter//Cytidylate kinase//RNA helicase//Adenovirus endoprotease//ABC-2 type transporter//Protein of unknown function, DUF258	GO:0006139//GO:0006206//GO:0006508	nucleobase-containing compound metabolic process//pyrimidine nucleobase metabolic process//proteolysis	GO:0016887//GO:0003924//GO:0005525//GO:0003723//GO:0005524//GO:0016301//GO:0003724//GO:0004197//GO:0004127	ATPase activity//GTPase activity//GTP binding//RNA binding//ATP binding//kinase activity//RNA helicase activity//cysteine-type endopeptidase activity//cytidylate kinase activity	GO:0016020	membrane
Cluster-242496.74689	K03352	APC5	anaphase-promoting complex subunit 5	http://www.genome.jp/dbget-bin/www_bget?ko:K03352	Q8H1U4	1733	9.50E-192	Anaphase-promoting complex subunit 5 OS=Arabidopsis thaliana GN=APC5 PE=1 SV=1	--	--	--	--	--	--	--	--
Cluster-242496.89117	--	--	--	--	Q9SHZ8	226	2.50E-17	Pentatricopeptide repeat-containing protein At2g22070 OS=Arabidopsis thaliana GN=PCMP-H41 PE=3 SV=1	--	--	--	--	--	--	--	--
Cluster-242496.102614	--	--	--	--	Q3E6Q1	1854	1.20E-205	Pentatricopeptide repeat-containing protein At1g11290, chloroplastic OS=Arabidopsis thaliana GN=PCMP-H40 PE=2 SV=1	PF17049	ATPase expression protein 1	GO:0006417	regulation of translation	GO:0045182	translation regulator activity	--	--
Cluster-242496.108413	K01148	PARN	poly(A)-specific ribonuclease	http://www.genome.jp/dbget-bin/www_bget?ko:K01148	Q8W4C3	587	9.30E-59	Poly(A)-specific ribonuclease PARN-like OS=Arabidopsis thaliana GN=At3g25430 PE=2 SV=1	PF04857	CAF1 family ribonuclease	--	--	--	--	GO:0005634	nucleus
Cluster-242496.79771	K14803	PTC2_3	protein phosphatase 2C homolog 2/3	http://www.genome.jp/dbget-bin/www_bget?ko:K14803	Q69VD9	996	2.80E-106	Probable protein phosphatase 2C 57 OS=Oryza sativa subsp. japonica GN=Os06g0597200 PE=2 SV=1	PF06574//PF00481//PF01554//PF02570	FAD synthetase//Protein phosphatase 2C//MatE//Precorrin-8X methylmutase	GO:0055085//GO:0009231//GO:0015893//GO:0006855//GO:0009236//GO:0015994//GO:0006771//GO:0006810	transmembrane transport//riboflavin biosynthetic process//drug transport//drug transmembrane transport//cobalamin biosynthetic process//chlorophyll metabolic process//riboflavin metabolic process//transport	GO:0003824//GO:0015238//GO:0016993//GO:0003919//GO:0015297	catalytic activity//drug transmembrane transporter activity//precorrin-8X methylmutase activity//FMN adenylyltransferase activity//antiporter activity	GO:0016020	membrane
Cluster-242496.121328	--	--	--	--	F4JJL0	331	3.90E-29	Endonuclease 4 OS=Arabidopsis thaliana GN=ENDO4 PE=3 SV=1	PF02265	S1/P1 Nuclease	GO:0006308	DNA catabolic process	GO:0004519//GO:0003676	endonuclease activity//nucleic acid binding	--	--
Cluster-242496.91732	--	--	--	--	--	--	--	--	--	--	--	--	--	--	--	--
Cluster-242496.92123	--	--	--	--	--	--	--	--	--	--	--	--	--	--	--	--
Cluster-242496.78346	--	--	--	--	P37707	167	5.20E-10	B2 protein OS=Daucus carota PE=2 SV=1	--	--	--	--	--	--	--	--
Cluster-242496.92859	--	--	--	--	Q9LJG8	185	3.40E-12	Trihelix transcription factor ASIL2 OS=Arabidopsis thaliana GN=ASIL2 PE=2 SV=1	PF10232	Mediator of RNA polymerase II transcription complex subunit 8	GO:0006357	regulation of transcription from RNA polymerase II promoter	GO:0001104	RNA polymerase II transcription cofactor activity	GO:0016592	mediator complex
Cluster-242496.81345	--	--	--	--	--	--	--	--	PF06156//PF00435	Protein of unknown function (DUF972)//Spectrin repeat	GO:0006260	DNA replication	GO:0005515	protein binding	--	--
Cluster-242496.100007	K13024	PPIP5K, VIP	inositol-hexakisphosphate/diphosphoinositol-pentakisphosphate 1-kinase	http://www.genome.jp/dbget-bin/www_bget?ko:K13024	O43314	1343	2.80E-146	Inositol hexakisphosphate and diphosphoinositol-pentakisphosphate kinase 2 OS=Homo sapiens GN=PPIP5K2 PE=1 SV=3	PF03367//PF10405//PF00328	ZPR1 zinc-finger domain//Rad4 beta-hairpin domain 3//Histidine phosphatase superfamily (branch 2)	GO:0019497//GO:0006771	hexachlorocyclohexane metabolic process//riboflavin metabolic process	GO:0003993//GO:0008270//GO:0003677	acid phosphatase activity//zinc ion binding//DNA binding	--	--
Cluster-242496.82979	--	--	--	--	Q9M1D8	1193	5.10E-129	Pentatricopeptide repeat-containing protein At3g60050 OS=Arabidopsis thaliana GN=At3g60050 PE=2 SV=1	PF00224	Pyruvate kinase, barrel domain	GO:0006144//GO:0006096//GO:0006094//GO:0015976	purine nucleobase metabolic process//glycolytic process//gluconeogenesis//carbon utilization	GO:0000287//GO:0030955//GO:0004743	magnesium ion binding//potassium ion binding//pyruvate kinase activity	--	--
Cluster-242496.89475	K12397	AP3B	AP-3 complex subunit beta	http://www.genome.jp/dbget-bin/www_bget?ko:K12397	Q9M2T1	974	1.70E-103	AP3-complex subunit beta-A OS=Arabidopsis thaliana GN=AP3BA PE=2 SV=2	PF02985//PF01602//PF05361	HEAT repeat//Adaptin N terminal region//PKC-activated protein phosphatase-1 inhibitor	GO:0042325//GO:0016192//GO:0006886	regulation of phosphorylation//vesicle-mediated transport//intracellular protein transport	GO:0005515	protein binding	GO:0005737//GO:0030117	cytoplasm//membrane coat
Cluster-242496.103614	--	--	--	--	Q9SCV4	733	3.40E-76	Beta-galactosidase 8 OS=Arabidopsis thaliana GN=BGAL8 PE=2 SV=2	--	--	--	--	--	--	--	--
Cluster-242496.109000	K10782	FATA	fatty acyl-ACP thioesterase A	http://www.genome.jp/dbget-bin/www_bget?ko:K10782	Q42561	629	1.30E-63	Oleoyl-acyl carrier protein thioesterase 1, chloroplastic OS=Arabidopsis thaliana GN=FATA PE=1 SV=1	PF14993//PF01643//PF00539	Neuropeptide S precursor protein//Acyl-ACP thioesterase//Transactivating regulatory protein (Tat)	GO:0007218//GO:0006355//GO:0006633	neuropeptide signaling pathway//regulation of transcription, DNA-templated//fatty acid biosynthetic process	GO:0003700//GO:0016790	transcription factor activity, sequence-specific DNA binding//thiolester hydrolase activity	GO:0005667//GO:0005576//GO:0042025	transcription factor complex//extracellular region//host cell nucleus
Cluster-242496.96838	--	--	--	--	Q9M345	380	3.70E-35	L-type lectin-domain containing receptor kinase IV.2 OS=Arabidopsis thaliana GN=LECRK42 PE=2 SV=1	PF00069//PF00139//PF07714	Protein kinase domain//Legume lectin domain//Protein tyrosine kinase	GO:0006468	protein phosphorylation	GO:0004672//GO:0005524//GO:0030246	protein kinase activity//ATP binding//carbohydrate binding	--	--
Cluster-242496.102469	--	--	--	--	A7SNN5	149	5.20E-08	Serine/threonine-protein kinase PLK4 OS=Nematostella vectensis GN=v1g246408 PE=3 SV=1	PF00069//PF07714	Protein kinase domain//Protein tyrosine kinase	GO:0006468	protein phosphorylation	GO:0005524//GO:0004672	ATP binding//protein kinase activity	--	--
Cluster-242496.93221	--	--	--	--	--	--	--	--	PF01704	UTP--glucose-1-phosphate uridylyltransferase	GO:0008152	metabolic process	GO:0070569	uridylyltransferase activity	--	--
Cluster-242496.74946	K07466	RFA1, RPA1, rpa	replication factor A1	http://www.genome.jp/dbget-bin/www_bget?ko:K07466	F4JSG3	1820	7.90E-202	Replication protein A 70 kDa DNA-binding subunit E OS=Arabidopsis thaliana GN=RPA1E PE=2 SV=1	PF00098//PF04057//PF01336	Zinc knuckle//Replication factor-A protein 1, N-terminal domain//OB-fold nucleic acid binding domain	GO:0006260	DNA replication	GO:0003676//GO:0003677//GO:0008270	nucleic acid binding//DNA binding//zinc ion binding	GO:0005634	nucleus
Cluster-242496.91828	--	--	--	--	--	--	--	--	--	--	--	--	--	--	--	--
Cluster-242496.108669	--	--	--	--	--	--	--	--	--	--	--	--	--	--	--	--
Cluster-242496.82554	--	--	--	--	Q9ZVT9	1173	9.80E-127	C2 and GRAM domain-containing protein At1g03370 OS=Arabidopsis thaliana GN=At1g03370 PE=2 SV=4	PF00168	C2 domain	--	--	GO:0005515	protein binding	--	--
Cluster-242496.80846	--	--	--	--	Q7LHG5	135	2.80E-06	Transposon Ty3-I Gag-Pol polyprotein OS=Saccharomyces cerevisiae (strain ATCC 204508 / S288c) GN=TY3B-I PE=3 SV=2	PF04061	ORMDL family	--	--	--	--	GO:0016021//GO:0005789	integral component of membrane//endoplasmic reticulum membrane
Cluster-242496.105887	--	--	--	--	--	--	--	--	--	--	--	--	--	--	--	--
Cluster-242496.70397	--	--	--	--	--	--	--	--	--	--	--	--	--	--	--	--
Cluster-242496.105571	--	--	--	--	Q9LTV8	802	4.50E-84	Pentatricopeptide repeat-containing protein At3g12770 OS=Arabidopsis thaliana GN=PCMP-H43 PE=2 SV=1	PF17049	ATPase expression protein 1	GO:0006417	regulation of translation	GO:0045182	translation regulator activity	--	--
Cluster-242496.112391	--	--	--	--	--	--	--	--	PF01494//PF01266//PF07992//PF01593//PF00070	FAD binding domain//FAD dependent oxidoreductase//Pyridine nucleotide-disulphide oxidoreductase//Flavin containing amine oxidoreductase//Pyridine nucleotide-disulphide oxidoreductase	GO:0055114	oxidation-reduction process	GO:0071949//GO:0016491	FAD binding//oxidoreductase activity	--	--
Cluster-242496.89479	--	--	--	--	--	--	--	--	PF07525	SOCS box	GO:0035556	intracellular signal transduction	--	--	--	--
Cluster-242496.112085	--	--	--	--	--	--	--	--	--	--	--	--	--	--	--	--
Cluster-242496.117637	--	--	--	--	--	--	--	--	PF07647	SAM domain (Sterile alpha motif)	--	--	GO:0005515	protein binding	--	--
Cluster-242496.102159	--	--	--	--	--	--	--	--	PF06423	GWT1	GO:0006506	GPI anchor biosynthetic process	GO:0016746	transferase activity, transferring acyl groups	GO:0005789//GO:0016021	endoplasmic reticulum membrane//integral component of membrane
Cluster-242496.120362	K08245	E3.4.23.40	phytepsin	http://www.genome.jp/dbget-bin/www_bget?ko:K08245	Q9XFX4	178	4.10E-12	Procardosin-B OS=Cynara cardunculus GN=cardB PE=1 SV=1	PF02209	Villin headpiece domain	GO:0007010	cytoskeleton organization	GO:0003779	actin binding	--	--
Cluster-242496.108403	--	--	--	--	--	--	--	--	PF08329//PF15202	Chitinase A, N-terminal domain//Adipogenin	GO:0016998//GO:0006032//GO:0045444	cell wall macromolecule catabolic process//chitin catabolic process//fat cell differentiation	GO:0004568	chitinase activity	--	--
Cluster-242496.112497	--	--	--	--	--	--	--	--	--	--	--	--	--	--	--	--
Cluster-242496.102661	--	--	--	--	--	--	--	--	--	--	--	--	--	--	--	--
Cluster-242496.110902	--	--	--	--	--	--	--	--	--	--	--	--	--	--	--	--
Cluster-242496.119563	--	--	--	--	Q7ZWG9	164	6.20E-10	Sigma non-opioid intracellular receptor 1 OS=Danio rerio GN=sigmar1 PE=2 SV=1	PF00804	Syntaxin	--	--	--	--	GO:0016020	membrane
Cluster-242496.125760	--	--	--	--	--	--	--	--	PF00098	Zinc knuckle	--	--	GO:0008270//GO:0003676	zinc ion binding//nucleic acid binding	--	--
Cluster-242496.114749	--	--	--	--	Q9LVP0	167	1.20E-10	Probable leucine-rich repeat receptor-like protein kinase At5g63930 OS=Arabidopsis thaliana GN=At5g63930 PE=2 SV=1	PF13516//PF00560//PF13855	Leucine Rich repeat//Leucine Rich Repeat//Leucine rich repeat	--	--	GO:0005515	protein binding	--	--
Cluster-242496.124273	--	--	--	--	--	--	--	--	--	--	--	--	--	--	--	--
Cluster-242496.81745	--	--	--	--	--	--	--	--	PF10473//PF08052//PF03194//PF04210//PF07432//PF01335//PF02895	Leucine-rich repeats of kinetochore protein Cenp-F/LEK1//PyrBI operon leader peptide//LUC7 N_terminus//Tetrahydromethanopterin S-methyltransferase, subunit G//Histone H1-like protein Hc1//Death effector domain//Signal transducing histidine kinase, homodimeric domain	GO:0006935//GO:0016310//GO:0046656//GO:0006376//GO:0042981//GO:0019856//GO:0015948//GO:0000160	chemotaxis//phosphorylation//folic acid biosynthetic process//mRNA splice site selection//regulation of apoptotic process//pyrimidine nucleobase biosynthetic process//methanogenesis//phosphorelay signal transduction system	GO:0008134//GO:0003729//GO:0042803//GO:0045502//GO:0030269//GO:0003677//GO:0000155//GO:0005515//GO:0004673	transcription factor binding//mRNA binding//protein homodimerization activity//dynein binding//tetrahydromethanopterin S-methyltransferase activity//DNA binding//phosphorelay sensor kinase activity//protein binding//protein histidine kinase activity	GO:0005667//GO:0005737//GO:0016021//GO:0005685//GO:0030286//GO:0009365	transcription factor complex//cytoplasm//integral component of membrane//U1 snRNP//dynein complex//protein histidine kinase complex
Cluster-242496.118024	K08099	E3.1.1.14	chlorophyllase	http://www.genome.jp/dbget-bin/www_bget?ko:K08099	O22527	312	2.30E-27	Chlorophyllase-1 OS=Arabidopsis thaliana GN=CLH1 PE=1 SV=1	PF12740//PF07224	Chlorophyllase enzyme//Chlorophyllase	GO:0015996//GO:0015994	chlorophyll catabolic process//chlorophyll metabolic process	GO:0047746	chlorophyllase activity	--	--
Cluster-242496.102320	--	--	--	--	--	--	--	--	--	--	--	--	--	--	--	--
Cluster-242496.102039	K12829	SF3B2, SAP145, CUS1	splicing factor 3B subunit 2	http://www.genome.jp/dbget-bin/www_bget?ko:K12829	--	--	--	--	--	--	--	--	--	--	--	--
Cluster-242496.113270	--	--	--	--	Q54KA7	196	2.60E-13	Ankyrin repeat, PH and SEC7 domain containing protein secG OS=Dictyostelium discoideum GN=secG PE=2 SV=1	PF07731//PF16367//PF00076//PF00023//PF13606//PF00642//PF00140//PF07473	Multicopper oxidase//RNA recognition motif//RNA recognition motif. (a.k.a. RRM, RBD, or RNP domain)//Ankyrin repeat//Ankyrin repeat//Zinc finger C-x8-C-x5-C-x3-H type (and similar)//Sigma-70 factor, region 1.2//Spasmodic peptide gm9a; conotoxin from Conus species	GO:0009405//GO:0055114//GO:0006352//GO:0006355	pathogenesis//oxidation-reduction process//DNA-templated transcription, initiation//regulation of transcription, DNA-templated	GO:0003676//GO:0016491//GO:0005507//GO:0003700//GO:0046872//GO:0016987//GO:0005515//GO:0003677	nucleic acid binding//oxidoreductase activity//copper ion binding//transcription factor activity, sequence-specific DNA binding//metal ion binding//sigma factor activity//protein binding//DNA binding	GO:0005576//GO:0005667	extracellular region//transcription factor complex
Cluster-242496.84595	--	--	--	--	--	--	--	--	--	--	--	--	--	--	--	--
Cluster-242496.86843	K09191	GTF3A	general transcription factor IIIA	http://www.genome.jp/dbget-bin/www_bget?ko:K09191	Q92618	145	3.30E-08	Zinc finger protein 516 OS=Homo sapiens GN=ZNF516 PE=1 SV=1	PF09044//PF01363//PF00096	Kp4//FYVE zinc finger//Zinc finger, C2H2 type	GO:0009405	pathogenesis	GO:0046872	metal ion binding	GO:0005576	extracellular region
Cluster-242496.87025	--	--	--	--	--	--	--	--	--	--	--	--	--	--	--	--
Cluster-242496.120646	K17279	REEP5_6	receptor expression-enhancing protein 5/6	http://www.genome.jp/dbget-bin/www_bget?ko:K17279	Q6NLY8	326	2.30E-28	HVA22-like protein k OS=Arabidopsis thaliana GN=HVA22K PE=2 SV=1	PF07749//PF11525	Endoplasmic reticulum protein ERp29, C-terminal domain//Copper resistance protein K	--	--	GO:0046872	metal ion binding	GO:0005783	endoplasmic reticulum
Cluster-242496.104743	--	--	--	--	--	--	--	--	PF06667	Phage shock protein B	GO:0006355//GO:0009271	regulation of transcription, DNA-templated//phage shock	--	--	--	--
Cluster-242496.90078	--	--	--	--	--	--	--	--	--	--	--	--	--	--	--	--
Cluster-242496.87472	--	--	--	--	Q0WPS0	1190	9.70E-129	Protein trichome birefringence-like 14 OS=Arabidopsis thaliana GN=TBL14 PE=2 SV=1	--	--	--	--	--	--	--	--
Cluster-242496.108666	--	--	--	--	--	--	--	--	--	--	--	--	--	--	--	--
Cluster-242496.111784	--	--	--	--	--	--	--	--	PF00097//PF17122//PF13639//PF12861//PF00628//PF17123//PF14634//PF12678	Zinc finger, C3HC4 type (RING finger)//Zinc-finger//Ring finger domain//Anaphase-promoting complex subunit 11 RING-H2 finger//PHD-finger//RING-like zinc finger//zinc-RING finger domain//RING-H2 zinc finger	GO:0016567	protein ubiquitination	GO:0005515//GO:0004842//GO:0008270//GO:0046872	protein binding//ubiquitin-protein transferase activity//zinc ion binding//metal ion binding	GO:0005680	anaphase-promoting complex
Cluster-242496.66045	--	--	--	--	Q700D9	164	3.50E-10	Putative Myb family transcription factor At1g14600 OS=Arabidopsis thaliana GN=At1g14600 PE=2 SV=2	--	--	--	--	--	--	--	--
Cluster-242496.159578	K14209	SLC36A, PAT	solute carrier family 36 (proton-coupled amino acid transporter)	http://www.genome.jp/dbget-bin/www_bget?ko:K14209	Q9SF09	967	3.90E-103	Amino acid transporter ANT1 OS=Arabidopsis thaliana GN=ANT1 PE=1 SV=1	PF08225	Pseudin antimicrobial peptide	GO:0006952	defense response	--	--	--	--
Cluster-242496.91379	--	--	--	--	--	--	--	--	PF01736	Polyomavirus agnoprotein	--	--	GO:0003677	DNA binding	--	--
Cluster-242496.73248	K14484	IAA	auxin-responsive protein IAA	http://www.genome.jp/dbget-bin/www_bget?ko:K14484	Q38831	382	4.40E-35	Auxin-responsive protein IAA13 OS=Arabidopsis thaliana GN=IAA13 PE=1 SV=2	PF02309	AUX/IAA family	GO:0006355	regulation of transcription, DNA-templated	--	--	GO:0005634	nucleus
Cluster-242496.91700	--	--	--	--	P0C899	584	3.50E-59	Putative pentatricopeptide repeat-containing protein At3g49142 OS=Arabidopsis thaliana GN=PCMP-H77 PE=3 SV=1	--	--	--	--	--	--	--	--
Cluster-242496.94002	K14412	FUT13, FucTC	alpha-1,4-fucosyltransferase	http://www.genome.jp/dbget-bin/www_bget?ko:K14412	Q9C8W3	744	4.20E-77	Alpha-(1,4)-fucosyltransferase OS=Arabidopsis thaliana GN=FUT13 PE=2 SV=2	PF05011//PF00852	Lariat debranching enzyme, C-terminal domain//Glycosyltransferase family 10 (fucosyltransferase) C-term	GO:0006397//GO:0006486	mRNA processing//protein glycosylation	GO:0016788//GO:0008417	hydrolase activity, acting on ester bonds//fucosyltransferase activity	GO:0016020	membrane
