# Supplementary material for: Population transcriptomic sequencing reveals allopatric divergence and local adaptation in Pseudotaxus chienii (Taxaceae)
Source: BMC Genomics. 2021 May 26;22:388. doi: 10.1186/s12864-021-07682-3 (PMC8157689; doi:10.1186/s12864-021-07682-3)
Supplement: Supplementary file 18 — Additional file 18. The annotation of the three candidate unigenes for habitat adaptation in the Hunan (HN) group. [file 12864_2021_7682_MOESM18_ESM.csv]

Additional file 18. The annotation of the three candidate unigenes for habitat adaptation in the Hunan (HN) group.
Unigenes	KEGG ID	KEGG Name	KEGG Description	Http Link	Swissprot ID	Swissprot Score	Swissprot Evalue	Swissprot Description	PFAM ID	PFAM description	Gene Ontology Biological Pathway	BP Description	Gene Ontology Molecular Function	MF Description	Gene Ontology Cellular Component	CC Description
Cluster-242496.115712	--	--	--	--	Q9LDD4	288	3.20E-24	AT-rich interactive domain-containing protein 2 OS=Arabidopsis thaliana GN=ARID2 PE=2 SV=1	PF01388	ARID/BRIGHT DNA binding domain	--	--	GO:0003677	DNA binding	--	--
Cluster-242496.90568	K12456	APC13	anaphase-promoting complex subunit 13	http://www.genome.jp/dbget-bin/www_bget?ko:K12456	--	--	--	--	--	--	--	--	--	--	--	--
Cluster-242496.95659	--	--	--	--	--	--	--	--	PF00178	Ets-domain	GO:0006355	regulation of transcription, DNA-templated	GO:0003700//GO:0043565	transcription factor activity, sequence-specific DNA binding//sequence-specific DNA binding	GO:0005667	transcription factor complex
